# Supplementary material
Source: HighWire-hosted journal article supplement (https://jitc.bmj.com/content/11/1/e005871)
Supplement: inline-supplementary-material-3 [file inline-supplementary-material-3.xlsx]

## Sheet: Supplementary Table 3
Supplementary Table 3. Epigenetic library.
Inhibitor	Research area	Target	Pharmacological description	Catalog number #
(+)-JQ1	Epigenetic Readers	BET	Potent, selective BET bromodomain inhibitor; cell permeable	4499
3-Aminobenzamide	Transcriptional Modulators	PARP	PARP inhibitor; demethylates DNA	0788
5-azacytidine	Epigenetic Writers	DNMT1	DNA methyltransferase inhibitor	3842
A 366	Epigenetic Writers	G9a/GLP	Potent and selective G9a/GLP histone lysine methyltransferase inhibitor	5163
AK 7	Epigenetic Erasers	SIRT2	Selective SIRT2 inhibitor; brain penetrant	4754
BIX 01294	Epigenetic Writers	G9a/GLP	G9a-like protein and G9a histone lysine methyltransferase inhibitor	3364
Bromosporine	Epigenetic Readers	pan-BRD	Broad spectrum bromodomain inhibitor	4758
C 646	Epigenetic Writers	p300/CBP	Selective p300/CBP HAT inhibitor	4200
CI-994	Epigenetic Erasers	HDAC1/3	Histone deacetylase inhibitor	2952
Daminozide	Epigenetic Erasers	KDM2/7	Selective histone demethylase KDM2/7 subfamily inhibitor	4684
Decitabine	Epigenetic Writers	DNMT	DNA methyltransferase inhibitor	2624
EGCG	Epigenetic Writers	DNMT1	DNMT1 inhibitor	4524
EX 527	Epigenetic Erasers	SIRT1	Selective SIRT1 inhibitor	2780
Fisetin	Epigenetic Writers	DNMT1	DNMT1 inhibitor	5016
Forskolin	Transcriptional Modulators	PKA	PKA activator; blocks nuclear export of HDAC5	1099
GSK J1	Epigenetic Erasers	JMJD3/UTX	Potent histone demethylase JMJD3/UTX inhibitor	4593
GSK J4	Epigenetic Erasers	JMJD3/UTX	Histone demethylase JMJD3/UTX inhibitor; cell permeable	4594
H 89 dihydrochloride	Epigenetic Writers	MSK1	Protein kinase A inhibitor	2910
I-BET 151 hydrochloride	Epigenetic Readers	BET	BET bromodomain inhibitor	4650
I-CBP 112	Epigenetic Readers	CREBBP/EP300	Selective CREBBP/EP300 bromodomain inhibitor	4891
IOX 1	Epigenetic Erasers	pan-JMJD	Histone demethylase inhibitor; cell permeable	4464
IOX 2	Transcriptional Modulators	PHD2	Potent, selective HIF-1α prolyl hydroxylase-2 (PHD2) inhibitor	4451
JIB 04	Epigenetic Erasers	pan-JMJD	Pan Jumonji histone demethylase inhibitor; active in vivo	4972
Kaempferol	Epigenetic Writers	RSK2	RSK2 inhibitor; blocks histone H3Ser10 phosphorylation	3603
KD 5170	Epigenetic Erasers	HDAC1/3/4/6	Histone deacetylase inhibitor	4001
KU 55933	Epigenetic Writers	ATM/ATR	Potent and selective ATM kinase inhibitor	3544
KU 60019	Epigenetic Writers	ATM/ATR	Potent ATM kinase inhibitor	4176
L002	Epigenetic Writers	p300	p300 inhibitor	5045
LMK 235	Epigenetic Erasers	HDAC4/5	Selective HDAC4/HDAC5 inhibitor	4830
Lomeguatrib	Epigenetic Writers	DNMT	O6-methylguanine-DNA methyltransferase (MGMT) inhibitor	4359
LY 303511	Epigenetic Readers	BET	BRD2, BRD3 and BRD4 inhibitor; also negative control of LY 294002 (Cat. No. 1130)	2418
M 344	Epigenetic Erasers	pan-HDAC	Histone deacetylase inhibitor	2771
MC 1568	Epigenetic Erasers	HDAC 4/5/7/9	Selectively inhibits HDAC class II (IIa)	4077
Mitoxantrone dihydrochloride	Epigenetic Writers	DNMT1	Topoisomerase II inhibitor; immunosuppressive and antineoplastic agent	4250
MS 436	Epigenetic Readers	BRD4	Potent and selective BRD4 bromodomain inhibitor	5173
NSC 3852	Epigenetic Erasers	pan-HDAC	Histone deacetylase inhibitor	2521
P 22077	Epigenetic Writers	USP7	USP7 inhibitor; blocks deubiquitination of Tip60 (KAT5) histone lysine acetyltransferase	4485
PCI 34051	Epigenetic Erasers	HDAC8	Potent and selective histone deacetylase 8 (HDAC8) inhibitor; induces apoptosis in T cell-derived cell lines	4643
PF 03814735	Epigenetic Writers	Aurora Kinase A/B	Aurora kinase A and B inhibitor	4821
PFI 1	Epigenetic Readers	BET	BET bromodomain inhibitor	4445
PFI 3	Epigenetic Readers	SMARCA4/2	Potent and selective SMARCA4 and polybromo 1 inhibitor; also inhibits SMARCA2	5072
PJ 34 hydrochloride	Transcriptional Modulators	PARP	Potent PARP inhibitor; alters epigenetic marks in thyroid cancer cells	3255
PRT 4165	Epigenetic Writers	E3 Ligase	Inhibitor of Bmi1/Ring1A; blocks histone H2A ubiquitination	5047
Pyroxamide	Epigenetic Erasers	HDAC1	Histone deacetylase inhibitor	4403
Resveratrol	Epigenetic Erasers	SIRT1	SIRT1 activator	1418
Retinoic acid	Transcriptional Modulators	HDAC	Endogenous retinoid; alters HDAC-mediated gene repression	0695
RG 108	Epigenetic Writers	DNMT	Non-nucleoside DNA methyltransferase inhibitor	3295
RN 1 dihydrochloride	Epigenetic Erasers	LSD1	LSD1 inhibitor	4977
SAHA	Epigenetic Erasers	pan-HDAC	Class I and II HDAC inhibitor	4652
Salermide	Epigenetic Erasers	SIRT1/2	SIRT1 and SIRT2 inhibitor	4127
SB 747651A dihydrochloride	Epigenetic Writers	MSK1	Potent MSK1 inhibitor; also inhibits other AGC group kinases	4630
SBHA	Epigenetic Erasers	HDAC1/3	Histone deacetylase inhibitor	3810
Scriptaid	Epigenetic Erasers	pan-HDAC	Histone deacetylase inhibitor	2421
SGC 0946	Epigenetic Writers	DOT1L	Highly potent and selective DOT1L inhibitor; cell permeable	4541
SGC-CBP 30	Epigenetic Readers	CREBBP/EP300	Potent CREBBP/EP300 bromodomain inhibitor	4889
SGI 1027	Epigenetic Writers	DNMT1	DNA methyltransferase inhibitor	5155
Sirtinol	Epigenetic Erasers	pan-SIRT	Selective sirtuin family deacetylase inhibitor	3521
SL 327	Epigenetic Writers	MEK	Selective inhibitor of MEK1 and MEK2; brain penetrant	1969
SNS 314 mesylate	Epigenetic Writers	pan-Aurora Kinase	Potent pan-Aurora kinase inhibitor	4584
Sodium 4-Phenylbutyrate	Epigenetic Erasers	pan-HDAC	Histone deacetylase inhibitor	2682
Splitomicin	Epigenetic Erasers	Sir2p	Sir2p inhibitor	1542
TC-E 5003	Epigenetic Writers	PRMT1	Selective PRMT1 arginine methyltransferase inhibitor	5099
TC-H 106	Epigenetic Erasers	HDAC 1/2/3/8	Class I histone deacetylase inhibitor	4270
TCS HDAC6 20b	Epigenetic Erasers	HDAC6	Selective HDAC6 inhibitor	4805
Temozolomide	Epigenetic Writers	DNA	DNA-methylating antitumor agent	2706
Tenovin-1	Epigenetic Erasers	SIRT1	SIRT1 and SIRT2 inhibitor; activates p53	3365
Tranylcypromine hydrochloride	Epigenetic Erasers	LSD1	Irreversible inhibitor of lysine-specific demethylase 1 (LSD1); also inhibits MAO	3852
Triptolide	Transcriptional Modulators	RNA Polymerase II	Inhibits RNAPII-mediated transcription	3253
U0126	Epigenetic Writers	MEK	Potent, selective inhibitor of MEK1 and 2	1144
UNC 0224	Epigenetic Writers	G9a	Potent G9a histone lysine methyltransferase inhibitor	3861
UNC 0638	Epigenetic Writers	G9a	Selective G9a and GLP histone lysine methyltransferase inhibitor	4343
UNC 0642	Epigenetic Writers	G9a/GLP	Potent and selective G9a and GLP histone lysine methyltransferase inhibitor	5132
UNC 0646	Epigenetic Writers	G9a/GLP	Potent and selective G9a/GLP inhibitor	4342
UNC 1215	Epigenetic Readers	L3MBTL3	Potent inhibitor of L3MBTL3 Kme reader domain; cell permeable	4666
UNC 926 hydrochloride	Epigenetic Readers	L3MBTL1	L3MBTL1 domain inhibitor	4516
Valproic acid, sodium salt	Epigenetic Erasers	pan-HDAC	Histone deacetylase inhibitor	2815
Zebularine	Epigenetic Writers	DNMT	DNA methyltransferase and cytidine deaminase inhibitor	2293
ZM 447439	Epigenetic Writers	Aurora Kinase B	Inhibits Aurora kinase B	2458

## Sheet: Supplementary Table 4
Supplementary Table 4. HDACi library.
Inhibitor	Isoform preference	HDACi classification	Catalog No.
Belinostat	Pan	Hydroxamic acid	S1085 (Selleckchem)
CI-994	Class I	Benzamide	5268 (Tocris)
Entinostat	Class I	Benzamide	S1053 (Selleckchem)
KD 5170	Pan	Mercaptoketone	5268 (Tocris)
LMK235	Class IIa	Hydroxamic acid	synthesized in-house
M 344	Pan	Hydroxamic acid	5268 (Tocris)
MC 1568	Class IIa	Hydroxamic acid	5268 (Tocris)
NSC 3852	Pan	Other	5268 (Tocris)
Panobinostat	Pan	Hydroxamic acid	S1030 (Selleckchem)
PCI 34051	HDAC8	Hydroxamic acid	5268 (Tocris)
Pyroxamide	Pan	Hydroxamic acid	5268 (Tocris)
Romidepsin	Class I	Depsipeptide	HY-15149 (medchemexpress)
SBHA	Pan	Hydroxamic acid	5268 (Tocris)
Scriptaid	Pan	Hydroxamic acid	5268 (Tocris)
Sodium 4-Phenylbutyrate	Pan	Aliphatic acid	5268 (Tocris)
TC-H 106	Class I	Benzamide	5268 (Tocris)
TCS HDAC6 20b	HDAC6	Other	5268 (Tocris)
Tubastatin A	HDAC6	Hydroxamic acid	S8049 (Selleckchem)
Valproic acid, sodium salt	Pan	Aliphatic acid	5268 (Tocris)
Vorinostat	Pan	Hydroxamic acid	S1047 (Selleckchem)

## Sheet: Supplementary Table 5
Supplementary Table 5. Clinical inhibitor library.
Inhibitor	Target	Catalog No.
3-Deazaneplanocin A hydrochloride	EZH2; HMTase;	HY-12186
5-Azacytidine	Nucleoside antimetabolite/analog;	HY-10586
5-Fluorouracil	Nucleoside antimetabolite/analog;	HY-90006
6-Mercaptopurine	Nucleoside antimetabolite/analog;	HY-13677
6-Thioguanine	Nucleoside antimetabolite/analog;	HY-13765
ABT-199	Bcl-2 Family;	HY-15531
Actinomycin D	DNA transcription	HY-17559
Afatinib dimaleate	EGFR;	HY-10261A
AICAR	AMPK;	HY-13417
Alisertib	Aurora Kinase;	HY-10971
Altretamine	DNA alkylator/crosslinker;	HY-B0181
Amonafide	Topoisomerase;	HY-10982
Anacetrapib	CETP;	HY-12090
API-2	DNA synthesis	HY-15457
Arctigenin	Others;	HY-N0035
Axitinib	VEGFR;	HY-10065
AZD-9291	EGFR;	HY-15772
AZD-9291 mesylate	EGFR;	HY-15772A
Bardoxolone methyl	IKK;	HY-13324
Baricitinib phosphate	JAK;	HY-15315A
BAY 80-6946	PI3K;	HY-15346
Belinostat	HDAC;	HY-10225
Bendamustine hydrochloride	Others;	HY-B0077
Betahistine dihydrochloride	Histamine Receptor;	HY-B0524A
Bexarotene	RAR/RXR;	HY-14171
BIBF 1120	FGFR; PDGFR; VEGFR;	HY-50904
Bleomycin sulfate	Others;	HY-17565
BML-286	PDZ domain of dishevelled	discontinued
BMN-673	PARP;	HY-16106A
Bortezomib	Proteasome;	HY-10227
Bosutinib	Bcr-Abl; Src;	HY-10158
Brivanib	VEGFR;	HY-10337
BSI-201	PARP;	HY-12015
Busulfan	DNA alkylator/crosslinker;	HY-B0245
Cabazitaxel	Microtubule/Tubulin;	HY-15459
Cabozantinib S-malate	VEGFR;	HY-12044
CAL-101	PI3K;	HY-13026
Canertinib	EGFR;	HY-10367
Capecitabine	Nucleoside antimetabolite/analog;	HY-B0016
Carboplatin	DNA alkylator/crosslinker;	HY-17393
Carfilzomib	Proteasome;	HY-10455
Carmustine	DNA alkylator/crosslinker;	HY-13585
Cediranib	VEGFR;	HY-10205
CEP-32496	Raf;	HY-15200
Chlorambucil	DNA alkylator/crosslinker;	HY-13593
Chlormethine hydrochloride	Others;	HY-B1253
CI-994	HDAC;	HY-50934
Cisplatin	DNA alkylator/crosslinker;	HY-17394
Cladribine	Adenosine Deaminase;	HY-13599
Clofarabine	Nucleoside antimetabolite/analog;	HY-A0005
Cobimetinib	MEK;	HY-13064
Crizotinib	ALK; c-Met/HGFR;	HY-50878
CYT387	JAK;	HY-17420
Cytarabine	Nucleoside antimetabolite/analog;	HY-13605
Dabrafenib mesylate	Raf;	HY-14660A
Dacarbazine	Nucleoside antimetabolite/analog;	HY-B0078
Dapagliflozin	SGLT;	HY-10450
Dasatinib	Bcr-Abl; Src;	HY-10181
Daunorubicin hydrochloride	Topoisomerase;	HY-13062
Decitabine	DNMT;	HY-A0004
Deforolimus	mTOR;	HY-50908
Dinaciclib	CDK;	HY-10492
Docetaxel	Microtubule/Tubulin;	HY-B0011
Dovitinib	c-Kit;	HY-50905
Doxorubicin hydrochloride	Topoisomerase;	HY-15142
Elesclomol	Apoptosis inducer;	HY-12040
Empagliflozin	SGLT;	HY-15409
Entinostat	HDAC;	HY-12163
Enzastaurin	PKC;	HY-10342
Epirubicin hydrochloride	Topoisomerase;	HY-13624A
EPZ-6438	EZH2; HMTase;	HY-13803
Erlotinib hydrochloride	EGFR;	HY-12008Y
Estramustine phosphate sodium	Microtubule/Tubulin;	HY-13627
Etoposide	Topoisomerase;	HY-13629
Everolimus	mTOR;	HY-10218
FG-4592	HIF;	HY-13426
Floxuridine	Nucleoside antimetabolite/analog;	HY-B0097
Fludarabine phosphate	Nucleoside antimetabolite/analog;	HY-B0028
Fosbretabulin disodium	Microtubule/Tubulin;	HY-17449
Ganetespib	HSP90;	HY-15205
GANT-61	GLI1	HY-13901
GDC-0994	ERK;	HY-15947
Gefitinib	EGFR;	HY-50895
Gemcitabine	Nucleoside antimetabolite/analog;	HY-17026
GSK 525762A	BET bromodomain;	HY-13032
GSK126	EZH2; HMTase;	HY-13470
GSK343	EZH2; HMTase;	HY-13500
Homoharringtonine	Others;	HY-14944
Honokiol	Apoptosis inducer;	HY-N0003
Idarubicin hydrochloride	Topoisomerase;	HY-17381
Imatinib mesylate	c-Kit; PDGFR;	HY-50946
INK 128	mTOR;	HY-13328
IPI-145	PI3K;	HY-17044
Irinotecan	Topoisomerase;	HY-16562
Isotretinoin	RAR/RXR;	HY-15127
Itraconazole	Antifungal;	HY-17514
Ixabepilone	Microtubule/Tubulin;	HY-10222
Lapatinib	EGFR;	HY-50898
LDE225	Smo;	HY-16582A
LDK378	ALK;	HY-15656
LEE011	CDK;	HY-15777
Lenvatinib	VEGFR;	HY-10981
LGK974	PORCN	HY-17545
LGX818	Raf;	HY-15605
Linifanib	PDGFR; VEGFR;	HY-50751
Linsitinib	IGF-1R; Insulin Receptor;	HY-10191
Lomustine	DNA alkylator/crosslinker;	HY-13669
Lonafarnib	Farnesyl Transferase;	HY-15136A
Losmapimod	p38 MAPK;	HY-10402
LY2835219	CDK;	HY-16297
LY3009120	Raf;	HY-12558
Marimastat	MMP;	HY-12169
Masitinib	c-Kit; PDGFR;	HY-10209
MEK162	MEK;	HY-B1253
Melphalan	DNA alkylator/crosslinker;	HY-17575
Methotrexate	Antifolate;	HY-14519
Mitomycin C	DNA alkylator/crosslinker;	HY-13316
Mitoxantrone dihydrochloride	Topoisomerase;	HY-13502A
MLN9708	Proteasome;	HY-10452
Motesanib diphosphate	c-Kit; VEGFR;	HY-10229
MRK003	γ-secretase	discontinued
Nelarabine	Nucleoside antimetabolite/analog;	HY-13701
Neratinib	HER; EGFR;	HY-32721
Nilotinib	Bcr-Abl;	HY-10159
Obatoclax	Bcl-2 Family;	HY-10969
Olaparib	PARP;	HY-10162
OTX-015	BET bromodomain;	HY-15743
Oxaliplatin	DNA alkylator/crosslinker;	HY-17371
Paclitaxel	Microtubule/Tubulin;	HY-B0015
Pacritinib	FLT3; JAK;	HY-16379
Palbociclib	CDK;	HY-50767
Palifosfamide	DNA alkylator/crosslinker;	HY-14798
Panobinostat	HDAC;	HY-10224
Pazopanib hydrochloride	PDGFR; VEGFR;	HY-12009
PCI-32765	Btk;	HY-10997
Pemetrexed	Antifolate;	HY-13781
Pentostatin	Adenosine Deaminase;	HY-A0006
Perifosine	Akt;	HY-50909
Pexidartinib	c-Fms; c-Kit;	HY-16749
PF-04691502	mTOR; PI3K;	HY-15177
Pipobroman	Others;	HY-16398
Ponatinib	Bcr-Abl; FGFR; FLT3; VEGFR;	HY-12047
Pralatrexate	Antifolate;	HY-10446
Procarbazine hydrochloride	DNA alkylator/crosslinker;	HY-13733
Quizartinib	FLT3;	HY-13001
R406	Syk;	HY-12067
R788 disodium hexahydrate	Syk;	HY-13038B
Rapamycin	mTOR;	HY-10219
Regorafenib	VEGFR;	HY-10331
Retinoic acid	RAR;	HY-14649
Rigosertib sodium	Polo-like Kinase (PLK);	HY-12037A
Romidepsin	HDAC;	HY-15149
Rucaparib phosphate	PARP;	HY-10617
Ruxolitinib (S enantiomer)	JAK;	HY-50858A
Ruxolitinib phosphate	JAK;	HY-50858
Selumetinib	MEK;	HY-50706
Semagacestat	γ-secretase;	HY-10009
Sorafenib tosylate	Raf;	HY-10201A
Staurosporine	PKC;	HY-15141
Streptozocin	DNA alkylator/crosslinker;	HY-13753
SU 5416	VEGFR;	HY-10374
Sunitinib	VEGFR; PDGFR;	HY-10255
TAK-632	Raf;	HY-15767
TAK-715	p38 MAPK;	HY-10456
Tariquidar	P-glycoprotein;	HY-10550
Tasquinimod	HDAC;	HY-10528
Temozolomide	DNA alkylator/crosslinker;	HY-17364
Temsirolimus	mTOR;	HY-50910
Teniposide	Topoisomerase;	HY-13761
Thioridazine hydrochloride	5-HT Receptor; Dopamine Receptor;	HY-13765
Thio-TEPA	DNA alkylator/crosslinker;	HY-17574
Tipifarnib	Farnesyl Transferase;	HY-10502
Tipiracil hydrochloride	Thymidine synthase;	HY-A0063
Tivantinib	c-Met/HGFR;	HY-50686
Tivozanib	VEGFR;	HY-10977
Tofacitinib citrate	JAK;	HY-40354A
Topotecan hydrochloride	Topoisomerase;	HY-13768A
Trametinib	MEK;	HY-10999
Trifluorothymidine	Nucleoside antimetabolite/analog;	HY-A0061
TSU-68	PDGFR;	HY-10517
Tubastatin A hydrochloride	HDAC;	HY-13271
Uramustine	DNA alkylator/crosslinker;	HY-13544
Valproic acid sodium salt	HDAC;	HY-10585
Valrubicin	Others;	HY-13772
Vandetanib	VEGFR;	HY-10260
Vatalanib dihydrochlorid	VEGFR;	HY-12018
Veliparib dihydrochloride	PARP;	HY-10130
Vemurafenib	Raf;	HY-12057
Verteporfin	YAP	HY-B0146
Vinblastine sulfate	Microtubule/Tubulin;	HY-13780
Vincristine sulfate	Microtubule/Tubulin;	HY-N0488
Vinflunine tartrate	Microtubule/Tubulin;	HY-B0628A
Vismodegib	Hedgehog;	HY-10440
Volasertib	Polo-like Kinase (PLK);	HY-12137
Vorinostat	HDAC;	HY-10221
VRT752271	ERK;	HY-15816
WP1066	JAK; STAT;	HY-15312
Zibotentan	Endothelin Receptor;	HY-10088
Zoledronic acid monohydrate	Others;	HY-13777A
Zosuquidar trihydrochloride	P-glycoprotein;	HY-50671
