# Supplementary material
Source: HighWire-hosted journal article supplement (https://jitc.bmj.com/content/11/1/e005871)
Supplement: inline-supplementary-material-5 [file inline-supplementary-material-5.xlsx]

## Sheet: Supplementary Table 7
Supplementary Table 7. IC50 values [µM] from epigenetic library screen and significances for entity comparisons.
Inhibitor	CHLA-01R-MED	CHLA-01-MED	D283 MED	D341 MED	D425 MED	HD-MB03	MB002	MB3W1	MED8A	DAOY	ONS76	UW-228-2	UW-228-3	CHLA-259	ATRT13808	BT-12	BT-16	CHLA-02-ATRT	CHLA-04-ATRT	CHLA-05-ATRT	CHLA-06-ATRT	CHLA-266	HHU-ATRT-01	JC-ATRT	VU397	AM-38	LN18	LN308	LNT229	SJ-GBM2	T98G	TP365	U138	U251	U87	YH-13	p value GBM vs other	p value ATRT vs other	p value MB vs other	p value MYC-MB vs other
KD 5170	0.714	1.633	6.298	1.344	0.5521	5.322	0.9357	0.5972	3.509	2.401	3.788	25	25	9.129	11.57	25	25	25	25	23.45	20.36	19.25	25	25	25	10.45	8.173	24.5	25	5.02	25	12.24	25	25	14.79	25	0.154858	4.19375e-05	1.70809e-05	2.09393e-11
SNS 314 mesylate	6.316	0.0609	8.908	9.455	7.302	6.779	0.05863	0.6626	6.065	0.3899	8.348	0.2016	25	25	25	12.91	25	25	25	22.91	25	7.07	25	23.16	12.47	25	3.906	25	25	0.9585	16.63	25	25	25	25	25	0.0584585	0.012577	6.89702e-05	3.92039e-07
Scriptaid	0.4803	0.6883	1.818	3.338	0.908	2.996	1.203	1.068	1.221	1.501	1.566	4.08	8	1.815	2.129	9.628	12.47	7.273	5.597	3.653	12.97	4.536	3.18	17	19.19	17.67	2.867	9.374	12.16	3.041	7.268	7.261	25	13.8	4.812	11.74	0.0325965	0.171282	1.43139e-05	3.80855e-06
Vorinostat	0.6024	0.6343	1.531	7.094	1.021	4.365	1.651	0.9725	1.184	1.652	1.782	5.179	6.657	3.934	2.096	19.04	25	9.888	13.86	4.528	16.25	6.942	3.523	22.61	17.15	25	2.882	7.338	13.21	6.381	6.431	5.881	25	12.01	4.798	25	0.116489	0.0505262	1.54691e-05	1.40505e-05
TC-H 106	6.004	6.634	13.12	7.879	2.619	19.16	10.14	7.249	4.941	10.55	11.72	25	25	10.72	13.38	20.03	25	25	25	23.85	25	9.295	12.47	25	25	20.85	10.43	25	25	13.06	25	19.16	25	25	21.27	25	0.0160955	0.0502449	0.000237991	2.56053e-05
LMK 235	0.3076	0.3335	0.6564	1.126	0.5507	0.8524	0.7604	0.4336	0.5038	0.709	0.6744	2.338	3.072	0.5715	1.405	4.226	3.021	6.247	6.803	2.984	10.06	1.464	2.012	14.17	10.78	6.149	1.738	5.924	7.618	0.7899	4.197	2.062	25	6.955	3.597	4.923	0.15294	0.147643	0.000270988	0.000119139
M 344	0.3644	0.3883	0.9119	1.337	0.3192	1.859	0.8469	0.4792	0.5825	0.875	0.8096	2.58	3.702	0.6917	1.212	4.123	4.583	4.505	6.91	2.354	8.313	1.528	1.371	11.63	10.18	6.816	1.775	5.797	6.826	1.592	4.814	4.489	25	6.444	3.43	4.425	0.102117	0.271554	0.000351473	0.000127838
NSC 3852	0.165	0.2832	1.513	0.6907	1.696	3.053	0.6112	0.09749	0.6859	1.401	4.054	1.437	3.475	2.829	0.7552	6.793	6.747	3.299	0.9616	0.9414	6.079	1.692	0.838	4.046	1.321	10.4	1.932	2.324	2.178	1.122	9.439	5.319	8.322	1.705	2.678	9.858	0.0359001	0.961404	0.00348498	0.000168626
5-Azacytidine	1.894	1.496	7.433	25	13.01	2.528	0.4049	0.7989	19.46	25	25	25	25	25	1.442	25	25	9.944	4.544	4.603	13.89	25	5.495	6.237	3.631	25	25	25	25	22.72	25	23.32	25	25	25	25	6.38297e-06	0.0441027	0.283525	0.00624052
CI-994	5.752	5.283	25	5.861	2.569	25	11.21	9.847	4.866	10.82	14.45	25	25	10.09	9.933	23.01	23.46	17.5	25	23.09	25	14.33	9.897	25	25	22.34	14.35	25	25	14.37	25	25	25	25	25	25	0.0028396	0.267021	0.00315647	0.00775214
SBHA	9.273	11.68	19.8	25	5.381	24.29	23.41	13.71	12.28	15.56	17.53	25	25	25	25	25	25	25	25	25	25	25	25	25	25	25	25	25	25	23.89	25	25	25	25	25	25	0.00503733	0.00360585	0.00225227	0.00879655
Decitabine	6.509	1.598	25	25	1.624	25	15.33	3.798	25	25	25	25	25	25	2.222	25	25	25	12.92	25	25	25	25	25	25	25	25	25	25	25	25	25	25	25	25	25	0.00783942	0.80995	0.0880168	0.0335877
Mitoxantrone dihydrochloride	0.1062	0.01294	0.09414	0.006985	0.0189	0.1642	0.1313	0.02136	0.05771	0.01045	0.0529	0.03236	0.1353	0.03077	0.1907	0.04494	0.1276	0.8819	0.0953	0.5889	7.83	0.03375	0.3087	1.865	0.2402	0.6234	0.05256	0.2991	0.2059	0.02933	0.8696	0.1986	1.827	0.1252	0.2307	1.835	0.89629	0.265123	0.0404858	0.0437825
SB 747651A dihydrochloride	25	25	25	25	25	25	19.36	25	25	19.58	9.09	25	25	11.34	25	25	25	25	25	25	25	25	25	25	16.3	25	20.44	13.34	25	23.77	19.18	11.4	25	25	25	25	0.44448	0.0847623	0.629212	0.0516049
I-BET 151 hydrochloride	2.16	3.301	25	8.482	2.311	25	0.4513	1.185	8.665	16.04	1.916	10.5	25	0.9502	3.276	25	25	25	25	13.27	25	13.19	25	25	8.025	25	2.924	25	25	25	17.18	3.006	25	3.969	13.11	9.225	0.561632	0.0358618	0.0157954	0.0551125
H 89 dihydrochloride	11.67	7.345	24.06	10.24	25	19.66	7.94	7.249	9.591	11.71	9.891	25	25	25	10.52	6.441	25	25	10.87	14.43	25	22.17	12.29	17.96	10.31	25	15.93	17.17	25	23.1	25	25	25	17.07	21.15	25	0.00173157	0.394461	0.151004	0.0576401
PF 03814735	1.744	0.5253	3.495	3.432	0.6758	7.435	0.0702	3.788	0.3068	2.837	2.588	0.9315	11.93	14.76	0.2735	3.459	7.153	3.24	0.4521	1.715	7.123	2.392	0.547	6.671	1.821	6.977	1.212	1.903	10.02	0.8064	1.174	1.872	14.84	5.248	7.422	4.949	0.325635	0.295984	0.860816	0.0643813
Tenovin-1	1.488	1.188	25	10.84	6.246	25	6.719	2.972	3.789	25	3.349	21.14	25	16.28	0.6262	17.59	16.65	25	4.564	4.233	25	19.79	12.49	6.113	2.106	25	7.051	10.06	25	18.22	25	25	25	16.52	14.59	25	0.0135654	0.314605	0.290227	0.0672631
MC 1568	17.39	7.91	25	18.95	25	25	2.437	11.23	25	17.05	25	15.5	25	18.47	25	25	25	25	25	25	25	10.16	25	25	25	25	25	25	25	25	25	20.91	25	25	25	24.28	0.0101328	0.187307	0.0150065	0.0782428
SGC-CBP 30	15.75	25	25	25	25	25	3.086	12.16	21.23	25	24.64	25	25	25	25	25	25	25	25	25	25	25	25	25	25	25	23	25	25	25	25	25	25	25	25	25	0.111801	0.0656407	0.0835493	0.0807241
SL 327	25	25	25	25	25	25	25	25	25	25	11.76	25	25	16.18	15.25	25	25	25	25	25	25	25	25	25	25	25	25	25	25	25	25	25	25	25	25	25	0.0882711	0.997118	0.350989	0.0882874
U0126	25	25	25	25	25	25	25	25	25	25	5.363	25	25	25	7.499	17.28	25	25	25	25	25	25	25	25	25	25	25	25	25	25	25	25	25	25	25	25	0.102682	0.427963	0.877399	0.102628
Retinoic acid	0.7299	25	25	2.648	12.66	25	25	25	25	25	25	25	25	25	25	25	25	25	25	25	25	25	25	25	24.95	18.31	25	25	25	25	25	25	25	25	25	25	0.24689	0.0662201	0.120413	0.105162
L002	1.909	2.925	6.069	1.324	4.742	9.305	3.264	2.095	3.57	2.622	2.437	3.297	3.872	3.84	4.759	3.343	10.59	11.58	6.988	3.977	9.508	1.431	4.916	14.96	5.3	5.217	3.643	0.9009	4.534	2.413	25	3.255	25	3.705	1.975	2.555	0.494129	0.299722	0.036135	0.10567
TC-E 5003	0.5232	0.4028	1.929	0.7412	0.0555	3.954	0.4301	0.3787	0.4668	0.831	0.746	0.684	1	2.527	0.5946	2.767	3.276	2.117	0.9782	0.717	22.94	0.8223	1.715	2.462	0.7995	5.082	0.9151	0.9953	1.087	0.8177	2.152	1.071	6.465	0.482	0.5747	3.342	0.952377	0.323162	0.103882	0.108949
PCI-34051	25	13.77	25	25	1.866	25	25	7.619	25	25	25	25	25	25	15.92	23.12	25	25	25	25	25	25	25	25	25	25	25	25	25	25	25	25	25	25	25	25	0.0507125	0.464959	0.150247	0.118
Pyroxamide	3.402	3.602	10.92	25	25	22.2	9.036	2.244	3.302	3.806	4.061	12.34	17.08	7.402	5.538	25	25	25	25	11	25	16.33	8.217	25	25	25	6.782	16.62	25	25	20.51	11.13	25	25	11.13	25	0.084829	0.104508	0.00301059	0.121413
MS 436	15.05	11.6	25	25	25	25	4.295	6.543	25	25	11.98	25	25	25	17.55	25	25	25	25	25	25	23.7	25	25	18.41	25	14.08	25	25	25	25	25	25	17.23	22.35	25	0.33281	0.121188	0.113029	0.123844
AK 7	25	25	20.09	25	3.032	8.48	17.35	25	25	25	25	25	25	25	25	25	25	25	25	25	25	25	24.29	25	25	25	18.33	25	25	25	6.958	25	25	25	25	25	0.931378	0.0291552	0.246005	0.130908
C 646	5.259	4.497	25	9.923	24.49	25	11.1	5.91	25	25	22.45	23.11	25	25	16.08	14.63	25	22.8	3.19	6.423	25	11.63	9.113	23.46	16.42	19.94	25	17.04	24.14	25	25	25	25	22.93	25	25	0.001498	0.0919409	0.631865	0.1434
(+)-JQ1	0.827	0.8448	25	3.039	0.7873	11.1	0.1837	0.1814	3.668	6.218	0.6887	4.375	25	0.2291	0.5455	14.88	12.75	25	9.036	1.488	25	7.815	8.027	6.551	1.981	25	0.5163	25	24.19	4.468	6.734	1.771	25	0.8225	3.257	6.979	0.370286	0.535289	0.123227	0.146163
P 22077	5.127	6.379	25	25	25	25	13.69	3.432	12.6	18.12	25	25	25	25	8.311	11.58	25	20.57	12.13	19.14	25	16.4	15.35	25	14.67	25	25	25	25	25	25	25	25	19.2	8.282	25	0.0317838	0.219552	0.516335	0.149697
JIB 04	0.02072	0.1693	1.046	0.4738	0.09262	0.1276	0.1074	0.1697	0.6183	0.5789	0.1446	0.6074	0.7365	0.01929	0.6173	0.05539	0.3863	0.7481	0.3088	0.1848	3.813	0.03866	0.1208	0.2518	0.07107	4.291	0.6756	0.5936	1.021	0.3368	2.354	0.7063	25	0.5097	0.7102	0.4896	0.220334	0.315431	0.165913	0.151773
Resveratrol	15.21	24.58	25	25	25	25	25	11.34	25	25	25	25	25	25	25	25	25	25	25	25	25	25	25	25	25	25	25	25	25	25	25	25	25	25	25	25	0.159744	0.159744	0.162997	0.16708
Triptolide	0.07696	0.01243	0.03178	0.01571	0.005503	0.08671	0.004577	0.02109	0.004967	0.05062	0.00895	0.01703	0.04307	0.1811	0.004174	0.01518	0.01033	12.47	0.1377	0.01202	0.01465	0.01391	0.08854	0.03612	0.02027	0.0162	0.004473	0.01467	0.008274	0.009891	0.01399	0.02676	25	0.0177	0.02445	0.05102	0.466353	0.928978	0.189281	0.183442
PFI 1	12.02	12.18	25	25	16.5	25	3.415	6.561	25	25	5.702	25	25	0.2545	15.82	22.6	25	25	25	25	25	20	25	25	23.07	25	11.98	25	25	25	25	11.17	25	12.7	24.67	25	0.447606	0.020953	0.0497758	0.18393
UNC 0642	25	25	15.46	3.324	22.49	25	16.18	12.18	2.46	3.898	3.516	4.102	5.554	25	25	5.578	15.36	25	25	17.32	25	13.87	10.77	19.78	18.81	11.03	5.007	3.063	4.155	10.32	7.517	6.059	15.07	5.844	3.568	12.36	0.000547391	0.00804492	0.861275	0.232668
PJ 34 hydrochloride	25	16.14	24.6	17.65	25	25	15.35	25	17.01	25	15.04	25	25	6.391	25	21.13	24.21	25	25	25	25	24.4	25	25	25	25	15.52	25	25	19.35	25	25	25	25	25	25	0.331477	0.0197747	0.0476816	0.263632
UNC 0646	25	25	11.87	3.723	16.08	25	25	25	1.191	5.076	2.288	4.536	3.783	7.176	25	5.446	11.07	25	25	25	25	15.88	25	25	25	25	4.164	7.032	7.93	8.052	5.097	4.793	11.19	3.779	2.233	25	0.032944	0.00195901	0.483825	0.279989
IOX 1	25	25	25	25	25	25	25	24.58	25	25	25	25	25	15.68	23.02	25	25	25	25	25	25	25	25	25	25	25	25	25	25	25	25	25	25	25	25	25	0.226187	0.615837	0.381947	0.301814
RN 1 dihydrochloride	25	25	25	25	25	25	25	25	25	25	25	25	25	25	25	25	25	25	24.92	25	25	25	25	25	25	25	25	25	25	25	25	25	25	25	25	25	0.327287	0.340893	0.328695	0.326527
Sodium 4-Phenylbutyrate	25	25	25	25	25	25	25	25	25	25	25	25	25	10.55	25	25	25	25	25	25	25	25	25	25	25	25	25	25	25	25	25	25	25	25	25	25	0.327287	0.327287	0.335561	0.326527
GSKJ1	25	25	25	25	25	25	25	25	25	25	25	25	25	5.492	25	25	25	25	25	25	25	25	25	25	25	25	25	25	25	25	25	25	25	25	25	25	0.327287	0.327287	0.335561	0.326527
Valproic acid sodium salt	25	25	25	25	25	25	25	25	25	25	25	25	25	25	25	25	25	25	25	25	25	22.98	25	25	25	25	25	25	25	25	25	25	25	25	25	25	0.327287	0.340893	0.328695	0.326527
LY303511	25	25	25	25	25	25	25	25	25	25	25	25	25	22.37	25	25	25	25	25	25	25	25	25	25	25	25	25	25	25	25	25	25	25	25	25	25	0.327287	0.327287	0.335561	0.326527
Temozolomide	25	25	25	25	25	25	25	25	25	25	25	25	25	24.11	25	25	25	25	25	25	25	25	25	25	25	25	25	25	25	25	25	25	25	25	25	25	0.327287	0.327287	0.335561	0.326527
Sirtinol	25	25	25	25	25	25	25	25	25	25	25	25	25	23.18	25	25	25	25	25	25	25	25	25	25	25	25	25	25	25	25	25	25	25	25	25	25	0.327287	0.327287	0.335561	0.326527
EGCG	25	25	25	25	5.375	25	25	25	25	25	25	25	25	25	25	25	25	25	25	25	25	25	25	25	25	25	25	25	25	25	25	25	25	25	25	25	0.327287	0.327287	0.335561	0.346594
KU 55933	25	25	25	25	25	25	13.24	25	25	25	25	25	25	25	25	25	25	25	25	25	25	25	25	25	25	25	25	25	25	25	25	25	25	25	25	25	0.327287	0.327287	0.335561	0.346594
Lomeguatrib	25	25	25	25	25	25	15.93	25	25	25	25	25	25	25	25	25	25	25	25	25	25	25	25	25	25	25	25	25	25	25	25	25	25	25	25	25	0.327287	0.327287	0.335561	0.346594
GSKJ4	3.759	14.51	16.33	10.99	4.2	3.877	2.062	3.502	3.249	10.39	2.051	4.021	9.675	3.123	6.458	2.283	2.978	4.728	3.398	3.156	14.85	2.265	5.829	4.037	2.948	25	7.27	15.51	11.9	4.105	17.06	13.41	25	3.301	13.7	22.5	0.00390872	0.00710396	0.148636	0.397125
BIX 01294	4.012	6.617	3.458	2.014	4.5	6.87	4.644	4.151	1.01	1.51	1.217	1.725	2.364	4.528	5.4	3.097	7.758	8.795	8.668	5.122	25	5.495	3.06	6.183	5.278	6.704	2.593	1.329	1.302	4.492	4.26	2.56	9.281	1.772	1.934	4.549	0.193747	0.0542505	0.0716432	0.422428
SGI 1027	5.124	5.25	5.134	0.8188	4.254	8.132	6.681	1.925	0.2118	3.064	1.05	2.242	2.31	25	5.9	1.81	7.722	7.845	3.104	2.806	16.61	2.323	3.038	9.185	4.083	5.87	1.501	2.837	1.533	6.371	4.145	2.787	9.274	1.101	1.124	6.752	0.281179	0.445924	0.918867	0.435578
Bromosporine	2.185	2.526	25	3.353	2.831	4.67	1.189	1.513	3.132	7.376	1.817	4.287	10.33	1.842	1.928	4.442	9.936	9.307	5.479	1.862	14.82	3.641	2.869	7.224	2.226	25	2.517	13.42	9.229	10.47	7.41	2.664	25	3.946	4.746	5.268	0.112705	0.451844	0.221736	0.44056
UNC 0638	14.74	17.93	9.695	2.439	10.44	14.08	11.87	9.493	1.096	2.861	2.347	3.998	2.665	4.098	13.58	4.22	14.87	22.28	24.12	11.94	25	8.017	9.66	14.85	11.24	7.654	3.926	3.835	3.948	9.779	4.674	3.101	7.314	4.379	2.697	7.152	0.00138856	0.00318007	0.292462	0.505518
KU 60019	25	22.06	22.28	25	25	25	5.842	25	16.37	20.89	24.84	23.3	25	25	15.65	25	25	25	25	25	25	25	25	25	20.67	25	9.742	16.2	25	17.9	16.62	25	25	25	25	25	0.437315	0.175552	0.817731	0.520146
ZM 447439	25	3.207	9.433	9.431	19.11	25	3.154	25	3.393	2.786	7.429	3.838	25	25	16.23	17.16	12.09	25	9.225	15.24	19.5	25	25	17.48	25	25	2.242	15.77	17.13	6.313	5.678	14.57	25	13.1	10.61	22.24	0.630857	0.0491231	0.301034	0.547419
Fisetin	25	25	25	25	25	25	18.32	24.56	25	25	25	25	25	25	22.6	17.24	25	23.61	19.19	22.77	25	25	15.11	25	23.87	25	25	25	25	25	25	25	25	24.84	25	25	0.0146508	0.0409451	0.250069	0.699744
SGC 0946	25	25	24.02	14.9	25	25	20.44	25	9.753	15.63	12.93	15.83	24.53	25	25	25	25	25	25	25	25	23.35	25	25	25	25	17.71	16.95	17.42	25	24.65	15.77	25	17.79	13.82	25	0.219697	0.000222925	0.242961	0.872856
UNC 0224	25	25	25	25	25	25	25	25	15.33	25	13.23	25	22.67	25	25	25	25	25	25	25	25	25	25	25	25	25	25	25	25	25	20.23	25	25	18.47	17.71	25	0.498802	0.0213927	0.464853	0.912309
3-Aminobenzamide	25	25	25	25	25	25	25	25	25	25	25	25	25	25	25	25	25	25	25	25	25	25	25	25	25	25	25	25	25	25	25	25	25	25	25	25	#DIV/0!	#DIV/0!	#DIV/0!	#DIV/0!
A 366	25	25	25	25	25	25	25	25	25	25	25	25	25	25	25	25	25	25	25	25	25	25	25	25	25	25	25	25	25	25	25	25	25	25	25	25	#DIV/0!	#DIV/0!	#DIV/0!	#DIV/0!
Daminozide	25	25	25	25	25	25	25	25	25	25	25	25	25	25	25	25	25	25	25	25	25	25	25	25	25	25	25	25	25	25	25	25	25	25	25	25	#DIV/0!	#DIV/0!	#DIV/0!	#DIV/0!
EX 527	25	25	25	25	25	25	25	25	25	25	25	25	25	25	25	25	25	25	25	25	25	25	25	25	25	25	25	25	25	25	25	25	25	25	25	25	#DIV/0!	#DIV/0!	#DIV/0!	#DIV/0!
Forskolin	25	25	25	25	25	25	25	25	25	25	25	25	25	25	25	25	25	25	25	25	25	25	25	25	25	25	25	25	25	25	25	25	25	25	25	25	#DIV/0!	#DIV/0!	#DIV/0!	#DIV/0!
I-CBP 112	25	25	25	25	25	25	25	25	25	25	25	25	25	25	25	25	25	25	25	25	25	25	25	25	25	25	25	25	25	25	25	25	25	25	25	25	#DIV/0!	#DIV/0!	#DIV/0!	#DIV/0!
IOX 2	25	25	25	25	25	25	25	25	25	25	25	25	25	25	25	25	25	25	25	25	25	25	25	25	25	25	25	25	25	25	25	25	25	25	25	25	#DIV/0!	#DIV/0!	#DIV/0!	#DIV/0!
Kaempferol	25	25	25	25	25	25	25	25	25	25	25	25	25	25	25	25	25	25	25	25	25	25	25	25	25	25	25	25	25	25	25	25	25	25	25	25	#DIV/0!	#DIV/0!	#DIV/0!	#DIV/0!
PFI 3	25	25	25	25	25	25	25	25	25	25	25	25	25	25	25	25	25	25	25	25	25	25	25	25	25	25	25	25	25	25	25	25	25	25	25	25	#DIV/0!	#DIV/0!	#DIV/0!	#DIV/0!
PRT 4165	25	25	25	25	25	25	25	25	25	25	25	25	25	25	25	25	25	25	25	25	25	25	25	25	25	25	25	25	25	25	25	25	25	25	25	25	#DIV/0!	#DIV/0!	#DIV/0!	#DIV/0!
RG 108	25	25	25	25	25	25	25	25	25	25	25	25	25	25	25	25	25	25	25	25	25	25	25	25	25	25	25	25	25	25	25	25	25	25	25	25	#DIV/0!	#DIV/0!	#DIV/0!	#DIV/0!
Salermide	25	25	25	25	25	25	25	25	25	25	25	25	25	25	25	25	25	25	25	25	25	25	25	25	25	25	25	25	25	25	25	25	25	25	25	25	#DIV/0!	#DIV/0!	#DIV/0!	#DIV/0!
Splitomicin	25	25	25	25	25	25	25	25	25	25	25	25	25	25	25	25	25	25	25	25	25	25	25	25	25	25	25	25	25	25	25	25	25	25	25	25	#DIV/0!	#DIV/0!	#DIV/0!	#DIV/0!
TCS HDAC6 20b	25	25	25	25	25	25	25	25	25	25	25	25	25	25	25	25	25	25	25	25	25	25	25	25	25	25	25	25	25	25	25	25	25	25	25	25	#DIV/0!	#DIV/0!	#DIV/0!	#DIV/0!
Tranylcypromine hydrochloride	25	25	25	25	25	25	25	25	25	25	25	25	25	25	25	25	25	25	25	25	25	25	25	25	25	25	25	25	25	25	25	25	25	25	25	25	#DIV/0!	#DIV/0!	#DIV/0!	#DIV/0!
UNC 1215	25	25	25	25	25	25	25	25	25	25	25	25	25	25	25	25	25	25	25	25	25	25	25	25	25	25	25	25	25	25	25	25	25	25	25	25	#DIV/0!	#DIV/0!	#DIV/0!	#DIV/0!
UNC 926 hydrochloride	25	25	25	25	25	25	25	25	25	25	25	25	25	25	25	25	25	25	25	25	25	25	25	25	25	25	25	25	25	25	25	25	25	25	25	25	#DIV/0!	#DIV/0!	#DIV/0!	#DIV/0!
Zebularine	25	25	25	25	25	25	25	25	25	25	25	25	25	25	25	25	25	25	25	25	25	25	25	25	25	25	25	25	25	25	25	25	25	25	25	25	#DIV/0!	#DIV/0!	#DIV/0!	#DIV/0!

## Sheet: Supplementary Table 8
Supplementary Table 8. IC50 values [µM] from HDACi library screen and significance for entity comparisons.
Inhibitor	CHLA-01-Med	CHLA-01R-Med	D283 MED	D341 MED	D425 MED	MED8A	DAOY	ONS76	UW228-2	UW228-3	LN18	LN308	LNT229	T98G	TP365	U138	U251	U87	ATRT13808	BT-12	BT-16	CHLA-02-ATRT	CHLA-04-ATRT	CHLA-05-ATRT	CHLA-06-ATRT	CHLA-266	HHU-ATRT01	JC-ATRT	VU397	p value MYC-MB vs other
CI-994	7.125	6.422	10.83	3.708	3.35	5.185	11.24	25	25	25	20.03	25	25	25	25	25	25	25	9.621	25	25	25	25	14.15	25	25	7.299	25	25	1.34379e-08
KD5170	3.398	0.6309	3.648	0.7843	0.1004	10.03	2.111	6.088	23.93	25	2.858	21.77	13.84	25	7.56	25	13.11	2.932	8.893	25	25	13.15	18.4	21.36	25	25	20.36	25	25	5.63935e-06
TC-H 106	9.385	6.692	12.32	4.804	1.999	5.801	14.74	17.81	25	25	11.93	25	25	25	21.74	25	25	25	9.063	25	25	25	16.67	14.95	25	18.11	8.541	25	25	5.91336e-06
Entinostat	1.28	1.639	1.504	0.6087	0.7977	1.546	2.084	5	7.052	11.68	2.551	8.333	5.781	18.93	4.811	25	7.051	4.089	2.056	12.27	12.64	5.655	6.099	2.648	25	6.329	1.883	8.232	13.18	2.62061e-05
LMK235	0.5529	0.4017	0.645	0.8616	0.2358	0.6864	1.291	1.115	1.95	2.906	1.072	5.213	3.596	4.086	2.641	17.22	3.099	1.948	1.687	6.187	7.731	5.964	2.876	1.963	7.603	3.315	2.035	8.164	8.268	4.52185e-05
Scriptaid	1.355	0.6204	1.623	2.333	0.5944	1.687	1.952	2.614	3.125	6.802	2.025	8.538	5.743	6.798	3.947	16.08	4.609	3.061	2.244	17.71	23.64	7.34	2.826	2.604	11.92	8.891	1.429	12.48	13.3	8.25155e-05
M344	0.5357	0.3481	0.6014	0.8015	0.1295	0.6022	1.021	1.079	1.793	2.842	1.097	4.944	2.941	4.517	1.994	15.06	2.445	1.848	1.212	5.521	6.28	2.767	1.614	1.435	7.513	3.036	0.684	6.643	5.83	0.000114372
Vorinostat	0.758	0.5673	1.326	3.285	0.7309	1.465	2.192	2.042	2.616	4.562	2.022	6.155	5.079	6.984	3.37	16.47	4.15	3.418	1.915	23.26	25	7.12	3.152	2.05	11.65	13.78	1.673	10.67	11.86	0.000342981
Pyroxamide	3.252	3.452	8.672	12.91	1.632	4.074	7.015	5.841	11.81	15.99	5.316	18.21	16.84	25	10.08	25	15.72	6.669	11.25	25	25	25	12.26	9.79	25	25	6.419	25	25	0.000408303
NSC 3852	0.1134	0.3658	1.445	0.4843	0.9618	0.4433	0.7816	7.887	1.073	1.434	0.7463	1.487	0.6542	2.957	1.551	3.376	0.8373	1.131	0.6326	4.108	9.815	1.903	0.7161	0.3787	8.372	2.351	0.4262	5.822	5.166	0.00189181
Belinostat	0.4635	0.257	0.5824	0.4844	0.05221	0.5397	0.5625	0.7417	0.8882	2.041	0.623	3.891	1.986	2.974	1.751	19.64	1.496	1.215	1.336	2.716	4.158	5.5	1.11	0.9502	6.211	1.601	1.584	8.288	8.192	0.00215579
SBHA	15.25	11.56	17.41	17.91	3.3	12.62	23.04	22.86	25	25	25	25	25	25	25	25	25	25	25	25	25	25	25	25	25	25	25	25	25	0.00296659
Panobinostat	0.04719	0.04215	0.01485	0.007737	0.004422	0.008455	0.01333	0.01348	0.02276	0.03531	0.0144	0.1352	0.04373	0.07184	0.03526	0.883	0.03055	0.02209	0.07701	0.0841	0.1863	0.3231	0.1902	0.1213	1.838	0.05646	0.04481	0.3893	0.2239	0.0342321
Romidepsin	0.002766	0.002755	0.002868	0.002781	0.002742	0.00277	0.002964	0.002835	0.002877	0.002874	0.002965	0.02533	0.002843	0.004611	0.004935	0.06649	0.002858	0.002825	0.003239	0.002833	0.01483	0.007465	0.009411	0.002087	0.1695	0.006283	0.005263	0.004329	0.02141	0.0908694
PCI 34051	5.305	25	25	25	1.723	25	20.56	25	25	25	25	25	25	25	25	25	25	25	25	25	25	25	25	25	25	25	25	25	25	0.186558
TCS HDAC6 20b	8.627	25	25	25	25	25	25	25	25	25	25	25	25	25	25	25	25	25	25	25	25	25	25	25	25	25	25	25	25	0.363217
Tubastatin A	25	25	23.73	25	2.293	7.63	10.08	21.96	20.31	25	16.42	19.94	16.21	24.69	25	25	14.97	13.53	25	25	25	25	25	25	25	25	25	25	25	0.395732
MC 1568	25	25	25	25	25	25	25	25	25	25	25	25	25	25	25	25	25	25	25	25	25	25	25	25	25	25	25	25	25	#DIV/0!
Phenylbutyrate	25	25	25	25	25	25	25	25	25	25	25	25	25	25	25	25	25	25	25	25	25	25	25	25	25	25	25	25	25	#DIV/0!
Valproic acid	25	25	25	25	25	25	25	25	25	25	25	25	25	25	25	25	25	25	25	25	25	25	25	25	25	25	25	25	25	#DIV/0!

## Sheet: Supplementary Table 9
Supplementary Table 9. Gene expression analysis following CI-994 treatment.
Chromosome	Start	Stop	Strand	Gene Symbol	p-value	Fold-Change	Significant Genes
19	18572220	18607742	-	CRLF1	0.0495346	104.702	significant
12	56079857	56103506	+	ERBB3	0.0495346	48.5019	significant
20	63488013	63499316	-	EEF1A2	0.0495346	46.603	significant
19	281040	291505	-	PLPP2	0.0495346	42.9927	significant
1	6101793	6180124	-	CHD5	0.0495346	28.866	significant
1	202590596	202710418	-	SYT2	0.0495346	28.4929	significant
11	61515313	61581149	-	SYT7	0.0495346	27.3335	significant
4	83292461	83335154	-	HPSE	0.0495346	27.0242	significant
22	38818452	38843983	-	NPTXR	0.0495346	24.4046	significant
19	1782075	1812277	-	ATP8B3	0.0495346	21.3158	significant
19	2977446	2995185	+	TLE6	0.0495346	20.7086	significant
20	38127387	38166579	-	TGM2	0.0495346	17.482	significant
16	58462846	58513629	+	NDRG4	0.0495346	16.2542	significant
19	7595902	7618305	+	CAMSAP3	0.0495346	16.0957	significant
1	112709994	112715478	-	PPM1J	0.0495346	14.3422	significant
5	178113443	178126088	+	N4BP3	0.0495346	14.3142	significant
11	72189558	72196302	+	FOLR1	0.0495346	14.2287	significant
15	74957219	75021497	+	SCAMP5	0.0495346	13.9327	significant
17	50055968	50090482	+	ITGA3	0.0495346	12.8244	significant
10	61901300	62096945	+	ARID5B	0.0495346	11.7605	significant
1	24502351	24541041	+	RCAN3	0.0495346	11.6028	significant
9	87497228	87708634	+	DAPK1	0.0495346	11.1562	significant
7	74289475	74405944	+	CLIP2	0.0495346	11.135	significant
19	17601328	17688366	-	UNC13A	0.0495346	10.9961	significant
14	104937244	104978358	-	AHNAK2	0.0495346	10.7268	significant
9	136658856	136672679	+	EGFL7	0.0495346	10.719	significant
12	7129698	7158946	+	CLSTN3	0.0495346	10.4334	significant
19	43622368	43639840	-	CADM4	0.0495346	9.1351	significant
2	20200797	20225434	-	SDC1	0.0495346	7.86587	significant
19	10086122	10093253	+	C19orf66	0.0495346	7.78116	significant
19	8413270	8439018	+	MARCH2	0.0495346	7.40776	significant
2	30231531	30323731	+	LBH	0.0495346	7.1001	significant
19	11199295	11262482	-	DOCK6	0.0495346	7.07031	significant
19	55158661	55166723	-	DNAAF3	0.0495346	6.64028	significant
20	63743666	63831245	-	ZBTB46	0.0495346	6.54313	significant
12	57723761	57742158	-	AGAP2	0.0495346	6.46387	significant
1	9651732	9729115	+	PIK3CD	0.0495346	6.20894	significant
12	65278643	65488245	+	MSRB3	0.0495346	6.16619	significant
1	30869467	30908762	-	SDC3	0.0495346	6.02275	significant
5	116443616	116574935	-	SEMA6A	0.0495346	5.81005	significant
1	27666061	27672219	-	IFI6	0.0495346	5.67074	significant
12	55684568	55716044	-	ITGA7	0.0495346	5.62014	significant
6	52361421	52407778	+	PAQR8	0.0495346	5.58587	significant
16	20610243	20797582	+	ACSM3	0.0495346	5.48757	significant
4	2269582	2418664	-	ZFYVE28	0.0495346	5.34069	significant
22	26646428	26676476	+	MIAT	0.0495346	5.25237	significant
2	43637273	43767988	+	PLEKHH2	0.0495346	5.16782	significant
3	58237506	58295694	+	ABHD6	0.0495346	4.96488	significant
6	89926529	90296909	-	BACH2	0.0495346	4.80765	significant
1	20719732	20732838	-	SH2D5	0.0495346	4.76039	significant
12	49332411	49337189	-	C1QL4	0.0495346	4.47635	significant
5	58453982	58460261	-	PLK2	0.0495346	4.45469	significant
19	55132794	55149355	-	TNNT1	0.0495346	4.44453	significant
20	33079644	33111752	+	BPIFB4	0.0495346	4.28579	significant
19	2997638	3047636	-	TLE2	0.0495346	4.12387	significant
4	185445182	185471760	-	CCDC110	0.0495346	4.10675	significant
19	49635292	49640202	-	RRAS	0.0495346	4.09483	significant
6	161129979	161274062	-	AGPAT4	0.0495346	4.0891	significant
9	15163622	15307361	-	TTC39B	0.0495346	4.00741	significant
22	26429273	26445016	+	ASPHD2	0.0495346	3.99659	significant
1	32894594	32901439	-	TMEM54	0.0495346	3.98995	significant
6	117907526	118317677	+	SLC35F1	0.0495346	3.77534	significant
15	43663654	43684340	-	AC011330.5	0.0495346	3.71643	significant
2	27253684	27275818	-	SLC30A3	0.0495346	3.59622	significant
19	676365	683400	+	FSTL3	0.0495346	3.55936	significant
1	33145402	33182060	-	TRIM62	0.0495346	3.54006	significant
9	126914774	127223167	+	RALGPS1	0.0495346	3.52963	significant
14	20684177	20698972	+	ANG	0.0495346	3.47428	significant
9	131096476	131123153	+	AIF1L	0.0495346	3.47367	significant
6	30876421	30900157	+	DDR1	0.0495346	3.43779	significant
1	1020123	1056119	+	AGRN	0.0495346	3.40877	significant
9	98198999	98255722	-	TBC1D2	0.0495346	3.40358	significant
15	78104606	78131545	-	CIB2	0.0495346	3.29859	significant
1	109250019	109275751	+	CELSR2	0.0495346	3.29306	significant
17	7404874	7419861	+	NLGN2	0.0495346	3.28982	significant
5	177086886	177098145	+	FGFR4	0.0495346	3.28408	significant
19	859643	863631	+	CFD	0.0495346	3.16922	significant
6	30489467	30494206	+	HLA-E	0.0495346	3.16773	significant
10	103277163	103290352	+	INA	0.0495346	3.15332	significant
16	67644919	67657570	+	RLTPR	0.0495346	3.11411	significant
16	50645809	50649250	+	RP11-401P9.4	0.0495346	3.02511	significant
16	50548330	50640740	+	NKD1	0.0495346	2.96163	significant
19	18340587	18369951	+	PGPEP1	0.0495346	2.95451	significant
1	155078872	155087539	+	EFNA3	0.0495346	2.95426	significant
12	48813794	48828942	+	CACNB3	0.0495346	2.89825	significant
12	57128493	57213352	+	LRP1	0.0495346	2.88228	significant
1	58780788	58784328	-	JUN	0.0495346	2.87067	significant
22	46150521	46243757	+	PPARA	0.0495346	2.84425	significant
20	36091504	36232800	+	EPB41L1	0.0495346	2.79954	significant
19	13795460	13832231	+	ZSWIM4	0.0495346	2.77875	significant
19	11342776	11346519	-	TMEM205	0.0495346	2.77043	significant
14	105172938	105181324	-	NUDT14	0.0495346	2.76016	significant
X	1403139	1453763	-	ASMTL	0.0495346	2.74238	significant
14	21070270	21090241	+	ARHGEF40	0.0495346	2.72876	significant
19	50505998	50511354	-	JOSD2	0.0495346	2.68218	significant
1	46607715	46616892	-	MOB3C	0.0495346	2.63214	significant
2	201621646	201623431	-	ENO1P4	0.0495346	2.63077	significant
7	76389334	76409696	-	SSC4D	0.0495346	2.57395	significant
13	100530164	100589529	-	GGACT	0.0495346	2.54474	significant
12	109714228	109770508	+	FAM222A	0.0495346	2.54078	significant
11	125445745	125496318	-	FEZ1	0.0495346	2.53334	significant
2	219538947	219543788	-	CHPF	0.0495346	2.5183	significant
19	49157741	49211837	+	TRPM4	0.0495346	2.39956	significant
X	135095028	135098635	-	SMIM10L2B	0.0495346	2.3948	significant
16	11797468	11798276	+	RP11-486I11.2	0.0495346	2.36934	significant
2	28392448	28417313	+	FOSL2	0.0495346	2.31089	significant
19	12763003	12872741	-	HOOK2	0.0495346	2.30785	significant
9	121207794	121332844	+	GSN	0.0495346	2.28729	significant
12	31729117	31731205	+	RP11-467L13.7	0.0495346	2.2837	significant
9	113444731	113597744	+	RGS3	0.0495346	2.28246	significant
5	174724533	174730894	+	MSX2	0.0495346	2.27152	significant
1	70354805	70385340	+	HHLA3	0.0495346	2.26383	significant
15	64151715	64157482	+	SNX22	0.0495346	2.26009	significant
1	160091340	160098944	-	IGSF8	0.0495346	2.19158	significant
20	3162617	3173593	-	RP5-1187M17.10	0.0495346	2.18651	significant
10	102394110	102402530	+	NFKB2	0.0495346	2.17226	significant
5	176595802	176610134	-	GPRIN1	0.0495346	2.14948	significant
3	15254853	15341369	-	SH3BP5	0.0495346	2.14312	significant
8	29067279	29263125	-	KIF13B	0.0495346	2.12942	significant
17	58095672	58101480	+	RP11-159D12.8	0.0495346	2.09568	significant
12	54369133	54391299	-	ZNF385A	0.0495346	2.09067	significant
7	44104361	44114563	+	AEBP1	0.0495346	2.08962	significant
17	40360655	40364694	+	CTD-2267D19.3	0.0495346	2.08829	significant
22	18906028	18914239	+	DGCR6	0.0495346	2.08023	significant
1	21217247	21345505	-	ECE1	0.0495346	2.06341	significant
14	101948347	101949426	+	RP11-1017G21.5	0.0495346	2.06055	significant
12	6199715	6238272	+	CD9	0.0495346	2.0387	significant
14	74903954	74923397	-	RPS6KL1	0.0495346	2.035	significant
7	131309744	131328223	-	MKLN1-AS	0.0495346	2.01236	significant
7	100612102	100615385	+	MOSPD3	0.0495346	2.01066	significant
14	23969874	24006409	+	DHRS4L2	0.0495346	-2.00898	significant
5	60945129	61153038	+	NDUFAF2	0.0495346	-2.00985	significant
6	110958560	110967891	+	GTF3C6	0.0495346	-2.01072	significant
15	75321397	75322694	-	ANP32BP1	0.0495346	-2.02004	significant
4	183639635	183659226	-	RWDD4	0.0495346	-2.02762	significant
17	49939122	49939820	+	RP11-304F15.5	0.0495346	-2.03216	significant
7	97852118	97872543	-	ASNS	0.0495346	-2.0338	significant
1	150960583	150975005	-	CERS2	0.0495346	-2.03859	significant
18	657604	673579	+	TYMS	0.0495346	-2.0573	significant
6	26198851	26199244	-	HIST1H2AD	0.0495346	-2.05777	significant
3	197509783	197573324	-	BDH1	0.0495346	-2.05904	significant
6	27125897	27132751	-	HIST1H2BJ	0.0495346	-2.06308	significant
7	74657667	74760693	+	GTF2I	0.0495346	-2.07873	significant
17	64145970	64146477	+	SNHG25	0.0495346	-2.0855	significant
4	145481194	145558080	+	SMAD1	0.0495346	-2.09703	significant
21	6630182	6670696	-	CH507-154B10.1	0.0495346	-2.09756	significant
2	240560054	240564015	+	DUSP28	0.0495346	-2.1032	significant
3	14112077	14124871	-	CHCHD4	0.0495346	-2.10896	significant
17	36535020	36539311	+	PIGW	0.0495346	-2.11624	significant
12	121429097	121581016	-	KDM2B	0.0495346	-2.1182	significant
21	5553637	5614881	+	RP11-717F1.2	0.0495346	-2.1292	significant
2	10439968	10448505	-	ODC1	0.0495346	-2.13165	significant
1	149887524	149887917	-	HIST2H2AB	0.0495346	-2.16404	significant
6	26199520	26200716	+	HIST1H2BF	0.0495346	-2.1895	significant
4	138164097	138242350	-	SLC7A11	0.0495346	-2.20496	significant
20	6213699	6215382	+	RP4-775C13.1	0.0495346	-2.21776	significant
2	199659551	199660730	+	SEPHS1P6	0.0495346	-2.23802	significant
10	13317424	13348299	-	SEPHS1	0.0495346	-2.25397	significant
9	97983361	98015944	+	ANP32B	0.0495346	-2.26261	significant
21	5499151	5502543	-	CH507-24F1.1	0.0495346	-2.27034	significant
7	150243916	150323726	-	ACTR3C	0.0495346	-2.32711	significant
2	3497361	3519737	-	ADI1	0.0495346	-2.41893	significant
6	107065182	107115270	-	BEND3	0.0495346	-2.44448	significant
1	156742107	156766926	-	HDGF	0.0495346	-2.53014	significant
1	229516582	229558696	-	ABCB10	0.0495346	-2.59679	significant
15	79833585	79897380	-	MTHFS	0.0495346	-2.60848	significant
1	26472450	26475973	+	HMGN2	0.0495346	-2.61503	significant
15	48312353	48331857	-	RP11-154J22.1	0.0495346	-2.70303	significant
X	73769248	73770424	+	SEPHS1P4	0.0495346	-2.70357	significant
8	58583504	58659845	-	NSMAF	0.0495346	-2.75206	significant
21	6721812	6725210	+	CH507-254M2.3	0.0495346	-2.78636	significant
15	29730713	29730986	+	HMGN2P5	0.0495346	-2.85551	significant
5	76242024	76242405	-	HMGN2P4	0.0495346	-3.13801	significant
12	7919230	7936276	-	SLC2A3	0.12663	665.041
1	51907956	51990765	-	RAB3B	0.275234	114.607
22	42692121	42721299	-	A4GALT	0.12663	110.996
2	215360440	215436173	-	FN1	0.12663	81.8426
6	36676460	36687340	+	CDKN1A	0.12663	72.2108
2	148875250	149026760	+	KIF5C	0.275234	69.8482
4	15963076	16084379	-	PROM1	0.275234	69.0936
4	42110938	42152879	-	BEND4	0.275234	55.4932
X	16946691	17153281	+	REPS2	0.275234	53.3716
1	42380795	42422579	+	RIMKLA	0.12663	53.174
2	172427354	172506283	+	ITGA6	0.512691	48.512
6	89364636	89412271	-	RRAGD	0.275234	47.3598
4	108810721	109302658	-	COL25A1	0.275234	38.6048
17	6393693	6435200	-	AIPL1	0.512691	35.34
5	131949973	132012244	-	ACSL6	0.512691	35.0079
20	49363877	49484298	-	KCNB1	0.275234	34.1644
2	17877847	18361617	+	KCNS3	0.275234	33.7588
1	28812142	28871268	+	OPRD1	0.827259	32.8391
1	209938174	210171316	+	SYT14	0.12663	32.1581
X	13771031	13938639	-	GPM6B	0.827259	31.9242
19	47019820	47045776	+	NPAS1	0.12663	31.2436
1	94148988	94275069	-	ARHGAP29	0.275234	31.1936
8	25184723	25418083	+	DOCK5	0.275234	31.1513
14	59595976	59870967	-	RTN1	0.275234	29.5925
2	232406843	232410715	+	ALPPL2	0.275234	28.9009
2	98619106	98731127	-	MGAT4A	0.275234	26.5526
2	85839144	85889015	-	ST3GAL5	0.275234	25.982
14	70641787	70675361	+	TTC9	0.12663	24.8742
1	159171609	159203314	+	CADM3	0.827259	24.4452
1	166895711	166975483	-	ILDR2	0.12663	24.4427
10	49734643	49762380	-	OGDHL	0.12663	23.4725
16	49277917	49281832	-	CBLN1	0.12663	22.9923
10	5035354	5107687	+	AKR1C3	0.512691	22.5318
19	4542593	4559809	-	SEMA6B	0.12663	22.1312
1	204218851	204377666	-	PLEKHA6	0.512691	21.5117
2	206274663	206314429	+	ZDBF2	0.275234	21.2754
X	38149336	38220925	-	SRPX	0.512691	20.8681
9	98120975	98192641	-	CORO2A	0.275234	20.0329
11	69641087	69654475	+	CCND1	0.512691	19.987
11	59171430	59208588	+	DTX4	0.12663	19.9416
15	43593054	43604902	+	CKMT1B	0.12663	19.7254
14	69259277	69357034	+	GALNT16	0.512691	19.7047
19	6530999	6535929	+	TNFSF9	0.12663	18.4357
X	46599252	46759173	-	SLC9A7	0.12663	17.7399
6	31353872	31357189	-	HLA-B	0.12663	16.7758
11	67491768	67506264	-	PITPNM1	0.512691	16.4113
1	204131062	204152004	-	ETNK2	0.275234	15.8767
3	133824239	133895837	-	RAB6B	0.275234	15.5378
17	73334384	73644090	-	SDK2	0.275234	15.5104
10	59176590	59247775	+	PHYHIPL	0.827259	15.3454
21	45593654	45603057	+	AL133493.2	0.512691	14.9853
15	101751032	101794303	+	DNM1P47	0.275234	14.8036
4	88457117	88506164	+	HERC5	0.512691	14.4444
12	125186836	125662378	+	TMEM132B	0.275234	13.9361
X	2903970	2929352	-	ARSD	0.275234	13.9256
4	74933095	75050116	+	PARM1	0.275234	13.9114
3	18345387	18445589	-	SATB1	0.512691	13.6002
7	87627548	87832297	+	RUNDC3B	0.512691	13.4049
1	171841498	172418467	+	DNM3	0.275234	13.2266
11	73646178	73662820	+	PLEKHB1	0.827259	13.0809
11	16778295	17014444	-	PLEKHA7	0.275234	12.9594
2	223975112	224039320	-	SERPINE2	0.275234	12.8512
18	9708165	9862552	+	RAB31	0.275234	12.8473
11	124752583	124762291	-	ESAM	0.275234	12.828
19	6677704	6730563	-	C3	0.12663	12.7483
14	50975262	51096062	-	TRIM9	0.12663	12.6114
17	45894382	46028335	+	MAPT	0.12663	12.3364
19	12825478	12835429	-	RTBDN	0.12663	12.311
18	7566782	8406862	+	PTPRM	0.275234	11.906
6	139028682	139043303	+	ABRACL	0.275234	11.7529
8	24950955	24957111	-	NEFL	0.275234	11.6161
8	26504686	26514093	-	PNMA2	0.275234	11.5159
8	133237171	133302023	-	NDRG1	0.275234	11.4442
4	25655301	25678749	+	SLC34A2	0.275234	11.4089
2	54723499	54972026	+	EML6	0.512691	11.3845
X	136665547	136782089	-	ARHGEF6	0.275234	11.3772
11	75434640	75525904	-	GDPD5	0.275234	11.306
4	7758714	7939927	-	AFAP1	0.275234	11.0286
21	17512382	17593580	+	CXADR	0.275234	10.8964
3	143119331	143124015	+	CHST2	0.275234	10.7901
6	75291859	75493739	-	FILIP1	0.275234	10.461
16	27402162	27452043	+	IL21R	0.12663	10.3358
22	37675608	37679807	+	LGALS1	0.512691	10.1896
2	24049701	24063682	+	FKBP1B	0.12663	10.1282
15	43692886	43699223	+	CKMT1A	0.275234	9.98284
16	15434295	15625029	+	C16orf45	0.275234	9.67468
19	49690898	49713732	+	CPT1C	0.12663	9.62329
17	1569267	1628887	-	SLC43A2	0.12663	9.62174
2	240713764	240820309	-	KIF1A	0.512691	9.56148
17	74950743	74973167	-	HID1	0.275234	9.3361
8	38411138	38468835	-	FGFR1	0.12663	9.04524
10	93306429	93482318	-	MYOF	0.512691	9.02571
1	78303884	78539750	+	PTGFR	0.512691	8.99541
14	91779751	91867537	-	TC2N	0.275234	8.94185
1	155859509	155885200	+	SYT11	0.275234	8.9057
17	49710332	49789181	-	FAM117A	0.275234	8.86619
5	157266079	157395596	+	CYFIP2	0.12663	8.84821
X	100674491	100732124	-	SYTL4	0.275234	8.84033
2	221418027	221574203	-	EPHA4	0.512691	8.80694
2	202073255	202197863	+	KIAA2012	0.275234	8.79851
18	58044367	58401541	+	NEDD4L	0.275234	8.75279
6	139371807	139374621	-	CITED2	0.12663	8.69704
14	23630115	23645640	+	DHRS2	0.275234	8.6751
6	89433170	89633835	+	ANKRD6	0.275234	8.4029
16	81739097	81962694	+	PLCG2	0.275234	8.35815
10	96593312	96720515	-	PIK3AP1	0.275234	8.29976
4	30720415	31146806	+	PCDH7	0.275234	8.26338
2	136765545	137677718	+	THSD7B	0.275234	8.22093
8	141117278	141195809	+	DENND3	0.275234	8.20727
1	40861051	40862367	-	CITED4	0.512691	8.19682
12	53479669	53500064	-	MAP3K12	0.12663	8.09035
X	24465221	24539838	+	PDK3	0.12663	8.04074
1	29236516	29326814	+	PTPRU	0.275234	7.92533
1	40620679	40665658	-	RIMS3	0.12663	7.92285
16	85027751	85094231	+	KIAA0513	0.12663	7.91
4	186587783	186726723	-	FAT1	0.275234	7.91
2	85394748	85418433	-	CAPG	0.512691	7.90475
4	148078762	148444699	-	NR3C2	0.275234	7.86566
7	80742538	80922360	-	SEMA3C	0.12663	7.8594
1	70852353	71047809	-	PTGER3	0.512691	7.7626
4	39045039	39126858	+	KLHL5	0.275234	7.63697
19	45668244	45683725	+	GIPR	0.12663	7.59272
17	78356778	78360078	-	SOCS3	0.12663	7.57045
1	220689845	220699158	+	C1orf115	0.12663	7.56187
17	82359247	82363777	+	TEX19	0.12663	7.53715
17	41754604	41786932	-	JUP	0.275234	7.53608
13	52842889	52848642	-	PCDH8	0.275234	7.5078
10	29457338	29736782	-	SVIL	0.275234	7.50213
1	45343883	45491167	-	TESK2	0.275234	7.47894
6	131808016	131895156	+	ENPP1	0.275234	7.46655
20	35558737	35607563	-	FER1L4	0.12663	7.41003
1	154405193	154469451	+	IL6R	0.827259	7.38328
X	52184823	52192269	+	MAGED4	0.12663	7.25166
12	57549998	57586633	+	KIF5A	0.12663	7.11717
3	50675241	51384199	+	DOCK3	0.275234	7.05735
1	93992835	94121133	-	ABCA4	0.827259	7.02175
18	6729718	6915717	+	ARHGAP28	0.12663	6.99004
1	6466092	6520062	-	PLEKHG5	0.512691	6.95273
11	121452203	121633694	+	SORL1	0.275234	6.92618
X	93670930	93673569	-	NAP1L3	0.275234	6.92214
11	61752642	61788519	+	MYRF	0.12663	6.91156
4	118722823	118838684	-	SEC24D	0.275234	6.83613
15	40278176	40307936	-	PLCB2	0.12663	6.72796
1	151770107	151791417	-	TDRKH	0.512691	6.6467
9	7786105	7786689	-	RP11-77E14.2	0.827259	6.46426
5	69492292	69558105	+	OCLN	0.12663	6.46321
11	11270876	11622006	-	GALNT18	0.512691	6.42989
6	32845209	32853979	-	TAP1	0.512691	6.32646
3	16313574	16514027	-	RFTN1	0.512691	6.22935
3	108380369	108529323	-	MYH15	0.512691	6.21287
19	45306414	45322978	-	CKM	0.512691	6.18537
2	85561562	85582032	+	VAMP8	0.512691	6.1195
X	65408084	65408673	+	TLE1P1	0.12663	6.07549
8	30995802	31033716	-	PURG	0.12663	6.06244
22	37490362	37519543	-	CARD10	0.275234	5.99434
17	32492522	32877178	-	MYO1D	0.275234	5.99309
3	71675416	71754774	-	EIF4E3	0.275234	5.96387
11	61897301	61920270	-	RAB3IL1	0.12663	5.94287
16	75472052	75495385	-	CHST6	0.512691	5.89438
1	26993707	27000899	+	TRNP1	0.275234	5.87993
15	90160604	90229680	+	SEMA4B	0.12663	5.8744
1	180230286	180278983	+	LHX4	0.512691	5.76994
10	30433937	30461834	+	MAP3K8	0.275234	5.73783
2	157318625	157327714	-	ERMN	0.275234	5.73062
13	73054976	73077543	+	KLF5	0.275234	5.72489
16	17101769	17470882	-	XYLT1	0.275234	5.5765
19	17951293	18000081	+	KCNN1	0.12663	5.54265
11	124865386	124881471	+	ROBO3	0.512691	5.53993
1	205504595	205532794	+	CDK18	0.275234	5.51882
6	5997999	6007606	-	NRN1	0.827259	5.48499
3	73382433	73624941	-	PDZRN3	0.275234	5.48143
9	109375466	109498314	-	PTPN3	0.275234	5.48044
1	156668763	156677398	-	NES	0.827259	5.46177
2	189560579	189583759	-	SLC40A1	0.512691	5.42484
12	7080209	7092608	-	C1R	0.12663	5.38924
5	112142441	112419317	-	EPB41L4A	0.512691	5.36255
5	42799880	42887393	-	SEPP1	0.512691	5.34556
21	45405137	45513721	+	COL18A1	0.512691	5.34384
1	23845077	23868295	-	FUCA1	0.12663	5.28494
6	105096822	105137175	-	BVES	0.275234	5.24839
11	119308529	119321522	-	MCAM	0.275234	5.22673
14	67533301	67589613	+	PLEKHH1	0.512691	5.22648
7	38383704	38631568	-	AMPH	0.512691	5.22407
2	29060976	29074262	-	C2orf71	0.275234	5.21479
X	24545516	24550467	+	GS1-358P8.4	0.275234	5.17479
1	31727117	31764894	-	ADGRB2	0.275234	5.16465
4	84582979	84651339	+	CDS1	0.275234	5.15652
2	230864639	230879249	+	ITM2C	0.12663	5.15213
12	51590266	51812865	+	SCN8A	0.512691	5.11473
9	73151757	73170394	+	ANXA1	0.512691	5.10721
11	119623408	119729085	-	PVRL1	0.512691	5.08519
3	52433053	52445086	-	SEMA3G	0.275234	5.04324
1	204073115	204127744	+	SOX13	0.12663	5.00505
18	2847030	2915994	+	EMILIN2	0.827259	4.99533
12	54395261	54419461	-	ITGA5	0.275234	4.98609
13	106489731	106535115	-	EFNB2	0.512691	4.97895
16	2140803	2154166	+	RAB26	0.275234	4.97332
1	178725147	178921842	+	RALGPS2	0.512691	4.89076
19	589893	617160	+	HCN2	0.12663	4.88307
3	170037929	170085404	+	GPR160	0.12663	4.86119
12	14881181	14885927	-	MGP	0.512691	4.835
1	41506365	42035926	-	HIVEP3	0.12663	4.75498
9	122202577	122229627	-	LHX6	0.512691	4.71356
7	23235967	23275109	+	GPNMB	0.512691	4.69388
20	50840615	50840750	-	TMSB4XP6	0.12663	4.68079
19	47403124	47419524	-	MEIS3	0.275234	4.66245
4	168356735	168537787	-	DDX60L	0.512691	4.65762
9	81583683	81689306	-	TLE1	0.275234	4.61247
5	138439017	138446970	+	REEP2	0.12663	4.5953
17	78110458	78132408	-	TMC6	0.12663	4.55122
4	169986597	170033032	-	MFAP3L	0.275234	4.53314
10	114431113	114685004	-	ABLIM1	0.512691	4.52874
10	28050993	28334487	-	MPP7	0.275234	4.5132
12	118981495	119163052	+	SRRM4	0.512691	4.48335
8	38901235	38973910	+	PLEKHA2	0.275234	4.43119
11	8980576	9004050	-	NRIP3	0.275234	4.42955
19	1490747	1497928	+	REEP6	0.12663	4.40994
15	75674322	75712849	-	CSPG4	0.827259	4.40237
7	45574140	45723117	+	ADCY1	0.827259	4.37815
3	124080023	124726326	+	KALRN	0.275234	4.36908
2	64453969	64461382	+	LGALSL	0.275234	4.36775
17	50561068	50627475	+	CACNA1G	0.512691	4.36513
21	31118416	31559978	-	TIAM1	0.512691	4.342
X	51332231	51337526	+	NUDT10	0.275234	4.33733
2	172735274	173052894	+	RAPGEF4	0.12663	4.32874
12	44508275	44921849	-	NELL2	0.512691	4.3235
17	60149936	60170900	+	CA4	0.275234	4.30494
16	692498	705830	-	FBXL16	0.275234	4.28769
5	142770384	143229012	+	ARHGAP26	0.275234	4.28664
2	190408355	190509206	+	MFSD6	0.275234	4.28059
17	50543058	50555853	+	SPATA20	0.275234	4.27555
1	208022242	208244321	-	PLXNA2	0.512691	4.26485
11	12094008	12263790	+	MICAL2	0.512691	4.25363
2	32946972	33399510	+	LTBP1	0.512691	4.2535
22	50263713	50270768	-	MAPK11	0.512691	4.22712
6	37630679	37699307	-	MDGA1	0.512691	4.1187
X	12975108	12977228	+	TMSB4X	0.275234	4.1079
9	133459965	133470849	+	CACFD1	0.12663	4.08326
9	33441154	33447612	-	AQP3	0.12663	4.05995
5	141636950	141641078	+	RELL2	0.275234	4.05142
13	20403667	20525858	-	CRYL1	0.275234	4.04974
12	113298759	113359494	-	SLC8B1	0.275234	4.02043
3	113828182	113947175	+	GRAMD1C	0.12663	4.01024
5	135534282	135535950	-	NEUROG1	0.827259	4.00297
12	117038923	117099480	-	TESC	0.275234	3.99183
16	28605196	28623626	-	SULT1A1	0.275234	3.98904
14	56817570	56893711	-	RP11-1085N6.5	0.275234	3.98281
13	52377167	52406495	-	THSD1	0.275234	3.96703
19	11377205	11384343	-	EPOR	0.275234	3.94302
2	6917392	7068287	+	RNF144A	0.275234	3.94259
2	159768630	159798256	-	CD302	0.512691	3.93848
4	78057570	78544270	+	FRAS1	0.275234	3.93532
6	111660332	111873453	-	FYN	0.275234	3.88056
4	100185870	100190783	-	DDIT4L	0.275234	3.87711
12	112938352	112973250	+	OAS3	0.275234	3.87447
12	70366276	70434293	+	KCNMB4	0.275234	3.87015
19	7830233	7864977	+	EVI5L	0.12663	3.86996
2	25042130	25159138	+	EFR3B	0.12663	3.86535
21	33485530	33491721	-	DNAJC28	0.12663	3.85633
8	24294040	24359019	+	ADAM28	0.512691	3.85521
1	1434861	1442883	+	VWA1	0.275234	3.8485
9	77716087	78031459	-	GNAQ	0.512691	3.84828
9	75088543	75147266	+	OSTF1	0.512691	3.82619
20	14322988	14337617	-	FLRT3	0.275234	3.81746
1	228208130	228378877	+	OBSCN	0.512691	3.81658
2	119429901	119438521	+	TMEM37	0.275234	3.81582
9	8314246	10612724	-	PTPRD	0.275234	3.80694
8	27596917	27615032	-	CLU	0.275234	3.75452
8	103500748	104256095	+	RIMS2	0.275234	3.75384
X	153642492	153651327	+	DUSP9	0.275234	3.73244
19	44846175	44889229	+	PVRL2	0.275234	3.7288
5	31639410	32110932	+	PDZD2	0.12663	3.72033
1	153543613	153550137	-	S100A4	0.512691	3.71463
22	42364400	42369237	-	LINC01315	0.512691	3.68545
X	68647666	68725843	+	STARD8	0.827259	3.66088
1	201023949	201028793	+	RP11-168O16.1	0.275234	3.63945
1	240014348	240475190	+	FMN2	0.512691	3.63212
14	74498170	74612379	-	LTBP2	0.512691	3.62482
14	51489100	51730728	+	FRMD6	0.275234	3.59831
18	36297714	36780056	+	FHOD3	0.512691	3.59261
6	148747328	149076991	+	UST	0.512691	3.57147
1	182789293	182830385	+	NPL	0.512691	3.57066
15	45167214	45201176	-	SHF	0.512691	3.56747
22	31104772	31120070	-	SELM	0.275234	3.56279
11	65576038	65592651	+	EHBP1L1	0.275234	3.53968
4	133149315	133208607	+	PCDH10	0.512691	3.52673
19	8848844	8981343	-	MUC16	0.512691	3.51272
9	110365251	110579881	-	SVEP1	0.512691	3.50385
22	37051736	37063391	+	KCTD17	0.12663	3.49858
1	151364302	151372734	-	SELENBP1	0.275234	3.49458
10	13099449	13138309	+	OPTN	0.275234	3.49032
20	57168748	57266630	-	BMP7	0.512691	3.47738
1	151510510	151538693	+	CGN	0.275234	3.47475
12	49293252	49298687	+	PRPH	0.827259	3.4743
8	85463852	85481494	+	CA2	0.512691	3.46863
9	76611376	76906088	-	PRUNE2	0.12663	3.45812
3	187721377	187745728	-	BCL6	0.512691	3.44124
11	67506497	67508650	-	CDK2AP2	0.12663	3.43571
10	101007683	101031158	-	PDZD7	0.12663	3.4325
21	8393419	8394342	-	CH507-513H4.4	0.827259	3.41693
8	119557086	119673454	-	ENPP2	0.512691	3.40905
7	27193503	27200107	-	HOXA13	0.275234	3.40461
X	17375420	17735995	+	NHS	0.275234	3.4015
11	65455258	65466721	+	CMB9-22P13.1	0.275234	3.39915
X	65588377	65741932	+	MSN	0.512691	3.39749
9	109171975	109320965	-	EPB41L4B	0.12663	3.38987
7	106656765	106660997	-	CCDC71L	0.275234	3.37984
22	24270898	24442357	+	SPECC1L-ADORA2A	0.275234	3.37658
X	18675909	18827922	+	PPEF1	0.827259	3.35009
5	14581775	14615008	+	FAM105A	0.275234	3.34203
X	106802680	106876146	+	TBC1D8B	0.275234	3.33704
2	237574322	237601615	-	RAB17	0.827259	3.3317
19	10512742	10517932	-	S1PR5	0.275234	3.32933
17	44345086	44353103	+	GRN	0.12663	3.3254
1	95117338	95197608	+	TMEM56	0.512691	3.31296
4	186191520	186213457	+	CYP4V2	0.827259	3.30841
5	88717117	88904258	-	MEF2C	0.827259	3.30734
12	49346917	49357547	+	DNAJC22	0.512691	3.29589
11	45885651	45906466	+	MAPK8IP1	0.12663	3.28349
11	75586918	75669121	-	MAP6	0.512691	3.28215
1	22710839	22921501	+	EPHB2	0.512691	3.27149
8	144466043	144474203	+	KIFC2	0.12663	3.26993
2	196194370	196593693	-	HECW2	0.275234	3.2564
3	52245793	52250598	+	PPM1M	0.275234	3.23952
19	32675407	32678301	+	RGS9BP	0.512691	3.23751
6	82363206	82370829	+	TPBG	0.512691	3.23557
1	27934993	27959158	+	SMPDL3B	0.275234	3.23397
5	147234963	147387853	+	STK32A	0.12663	3.21923
20	35172073	35216241	+	PROCR	0.275234	3.21286
6	143060496	143340305	+	AIG1	0.275234	3.20207
10	102402617	102421540	-	PSD	0.275234	3.20167
11	115169218	115504958	-	CADM1	0.275234	3.19875
12	123410683	123436718	-	RILPL2	0.12663	3.18901
16	29820394	29848040	+	MVP	0.275234	3.18747
14	24052000	24069729	+	LRRC16B	0.275234	3.18716
1	10636604	10796651	-	CASZ1	0.12663	3.17814
22	30606838	30627279	+	TCN2	0.827259	3.16023
12	12890782	12917938	+	GPRC5A	0.512691	3.15529
2	170813213	170861152	+	GAD1	0.275234	3.15065
2	113157325	113209397	+	PSD4	0.275234	3.14252
8	133454848	133571941	-	ST3GAL1	0.275234	3.14002
19	13834516	13836290	-	CTD-3252C9.4	0.275234	3.13562
13	28300344	28495129	-	FLT1	0.512691	3.12815
X	23783173	23786227	+	SAT1	0.275234	3.12445
19	45606994	45645630	-	EML2	0.12663	3.12163
3	33150042	33219216	-	SUSD5	0.512691	3.11268
6	167826922	167972024	+	MLLT4	0.275234	3.10967
4	47914142	48040174	+	NIPAL1	0.275234	3.1042
X	106611930	106679443	+	CXorf57	0.275234	3.09146
6	46129993	46146700	+	ENPP4	0.12663	3.08342
17	39904595	39919855	-	GSDMB	0.275234	3.079
1	46394265	46413849	+	FAAH	0.512691	3.07813
5	180601506	180649625	-	FLT4	0.275234	3.06539
1	203026498	203078741	+	PPFIA4	0.275234	3.06184
17	15229777	15265327	-	PMP22	0.275234	3.06091
9	19409059	19452021	+	ACER2	0.512691	3.04928
1	117605934	117628373	+	FAM46C	0.12663	3.03795
4	119212587	119295518	+	USP53	0.275234	3.03354
5	149430286	149432835	+	RP11-394O4.5	0.275234	3.03291
16	29871159	29899548	-	SEZ6L2	0.12663	3.03066
11	95165513	95232542	-	SESN3	0.12663	3.03
8	8317736	8386499	-	SGK223	0.275234	3.02708
2	42048020	42058529	+	PKDCC	0.512691	3.0191
6	31268749	31272131	-	HLA-C	0.275234	3.00364
5	55424854	55535051	-	PLPP1	0.512691	3.0033
19	17402939	17405649	-	BST2	0.512691	2.99598
20	32762385	32809357	+	DNMT3B	0.512691	2.99549
1	46506996	46514227	+	DMBX1	0.827259	2.9931
5	142310427	142326456	-	SPRY4	0.827259	2.98836
12	13000420	13004831	+	HTR7P1	0.275234	2.98819
16	57092537	57148368	+	CPNE2	0.12663	2.98287
1	15152532	15220481	+	TMEM51	0.275234	2.97649
2	26970612	27027197	+	MAPRE3	0.12663	2.97348
19	40447789	40465841	-	BLVRB	0.275234	2.97164
15	43772600	43777544	-	ELL3	0.512691	2.96884
12	57460135	57472263	+	GLI1	0.512691	2.96322
3	139935185	140577398	+	CLSTN2	0.275234	2.95422
17	31391624	31538218	+	RAB11FIP4	0.512691	2.95287
11	82973133	83071924	-	RAB30	0.512691	2.94258
1	93561786	93847151	-	BCAR3	0.827259	2.93321
11	78171249	78188823	-	KCTD21	0.12663	2.92635
X	129981107	130058084	+	BCORL1	0.275234	2.92343
8	97868840	98036717	+	MATN2	0.512691	2.91828
1	56494747	56645302	-	PLPP3	0.12663	2.90788
15	63276018	63309127	+	APH1B	0.275234	2.8974
7	64971776	65006685	-	ZNF117	0.275234	2.89231
4	76435100	76783254	+	SHROOM3	0.512691	2.8905
20	35226654	35277001	+	MMP24	0.512691	2.88596
16	3018445	3022384	+	TNFRSF12A	0.512691	2.88398
16	4796968	4802951	-	ROGDI	0.12663	2.88344
2	232606057	232682782	+	EFHD1	0.512691	2.88335
2	130073535	130129223	-	POTEF	0.512691	2.88305
2	151832776	152099080	-	CACNB4	0.827259	2.88276
19	10602457	10644560	+	SLC44A2	0.275234	2.87687
16	77788530	77980108	+	VAT1L	0.512691	2.87685
16	58231157	58283837	+	CCDC113	0.512691	2.87536
6	3268962	3457023	-	SLC22A23	0.827259	2.87465
15	88898683	88913412	-	MFGE8	0.512691	2.85765
4	125316399	125492933	+	FAT4	0.275234	2.85389
17	4948092	4957132	+	ENO3	0.275234	2.8513
1	65248219	65415870	+	DNAJC6	0.512691	2.82941
5	141181399	141186400	+	PCDHB16	0.512691	2.82659
X	53232876	53321325	-	IQSEC2	0.275234	2.81155
1	205568885	205602919	+	MFSD4	0.275234	2.80552
10	100969518	100985872	+	SEMA4G	0.827259	2.79343
22	50622754	50628174	-	ARSA	0.12663	2.79218
7	122303658	122310078	+	FEZF1-AS1	0.827259	2.76288
14	33924231	34462775	-	EGLN3	0.12663	2.75945
15	26543546	26939540	-	GABRB3	0.512691	2.75515
17	44759031	44781847	+	ADAM11	0.12663	2.75148
1	41361922	41383591	+	FOXO6	0.275234	2.74943
12	104455295	104762015	+	CHST11	0.12663	2.74733
11	62433542	62556236	-	AHNAK	0.275234	2.73875
14	32329273	32837682	+	AKAP6	0.275234	2.73568
12	57623410	57633356	-	B4GALNT1	0.512691	2.7297
1	107571160	107965145	-	VAV3	0.512691	2.70962
21	8254592	8255515	-	CH507-513H4.5	0.827259	2.70787
10	87659613	87747706	+	PAPSS2	0.827259	2.70779
5	179806398	179838079	+	SQSTM1	0.827259	2.70557
3	38007496	38029763	-	PLCD1	0.12663	2.70071
15	48134631	48178518	-	MYEF2	0.512691	2.69606
12	76025447	76033933	-	PHLDA1	0.512691	2.68719
4	82629539	82798858	-	SCD5	0.275234	2.68182
19	18173162	18178118	+	IFI30	0.275234	2.67819
14	57999735	58298140	-	C14orf37	0.512691	2.67669
1	20633455	20651512	+	PINK1	0.275234	2.67054
2	73254682	73284432	-	FBXO41	0.512691	2.6693
7	102912991	102944950	+	LRRC17	0.827259	2.6665
16	89921392	89938762	+	TUBB3	0.12663	2.65277
3	61561569	62297614	+	PTPRG	0.512691	2.63973
19	19063999	19112889	+	SLC25A42	0.275234	2.6387
18	49822813	50195094	-	MYO5B	0.827259	2.63541
1	231626815	232041273	+	DISC1	0.12663	2.62917
3	100492619	100577445	+	TMEM45A	0.512691	2.62526
9	75060573	75088218	-	NMRK1	0.275234	2.62473
8	103156990	103298773	-	BAALC-AS1	0.275234	2.62114
11	20669551	21575682	+	NELL1	0.512691	2.62044
7	134527592	134541409	+	AKR1B10	0.12663	2.61762
5	140332843	140346632	-	HBEGF	0.12663	2.61332
19	7888505	7902022	+	LRRC8E	0.275234	2.6113
17	45132600	45144182	+	ACBD4	0.275234	2.60808
9	35104112	35116342	-	FAM214B	0.12663	2.59937
9	129483451	129513684	+	LINC00963	0.827259	2.58946
12	107318413	107659643	+	BTBD11	0.512691	2.58041
19	40778216	40796939	+	RAB4B	0.275234	2.5784
7	90154375	90164830	+	STEAP1	0.827259	2.57541
1	43991359	43996529	+	CCDC24	0.827259	2.55183
X	133300103	133415491	-	GPC4	0.827259	2.54547
2	9951693	10002278	+	GRHL1	0.12663	2.54387
3	113964137	114056614	-	CCDC191	0.512691	2.53859
8	22987417	23020200	+	RHOBTB2	0.12663	2.53856
3	57089982	57170307	-	IL17RD	0.275234	2.53759
16	30104810	30113857	-	GDPD3	0.512691	2.53598
6	41780349	41790142	+	PRICKLE4	0.12663	2.53144
14	74941834	74955785	-	PGF	0.827259	2.52927
16	57471922	57487328	-	DOK4	0.275234	2.52648
3	4979116	4985324	+	BHLHE40	0.827259	2.51737
7	73699206	73719673	-	STX1A	0.275234	2.51005
10	12349482	12835546	+	CAMK1D	0.512691	2.50221
1	5991466	6101194	+	KCNAB2	0.275234	2.49603
1	101236888	101241519	+	S1PR1	0.827259	2.49396
7	75769533	75789897	-	CCL26	0.12663	2.49104
8	69667047	69835065	-	SLCO5A1	0.275234	2.49021
11	64784914	64803242	-	MAP4K2	0.12663	2.48756
17	80219699	80253501	+	SLC26A11	0.275234	2.4742
20	50794894	50882677	+	BCAS4	0.12663	2.47046
X	148500619	149000664	+	AFF2	0.512691	2.46769
8	102648779	102655903	-	KLF10	0.512691	2.46695
6	81491439	81752775	-	FAM46A	0.275234	2.45569
17	1711493	1717175	-	MIR22HG	0.827259	2.45348
19	4838341	4867769	-	PLIN3	0.512691	2.44844
7	150944961	150978316	-	KCNH2	0.827259	2.4476
1	156082573	156140090	+	LMNA	0.275234	2.44689
15	43533462	43590254	-	PPIP5K1	0.12663	2.44052
19	45485289	45497062	-	RTN2	0.12663	2.43782
2	205681990	205798134	+	NRP2	0.827259	2.43745
21	45070952	45074166	-	SSR4P1	0.12663	2.4349
9	136327476	136359606	+	GPSM1	0.512691	2.4264
2	20447074	20449446	+	RHOB	0.12663	2.42491
20	53567065	53609908	-	ZNF217	0.275234	2.42387
1	162366908	162386819	+	C1orf226	0.512691	2.41996
9	19453209	19455174	+	RP11-363E7.4	0.275234	2.41739
16	29811382	29815893	+	PRRT2	0.275234	2.41307
12	70515866	70637441	-	PTPRB	0.827259	2.41124
3	132558142	132722460	-	NPHP3-ACAD11	0.12663	2.41123
17	8173237	8176400	-	TMEM107	0.512691	2.41081
3	38548057	38649674	-	SCN5A	0.512691	2.40612
17	43875357	43909712	-	MPP2	0.12663	2.40442
1	220786759	220819658	+	MARC1	0.827259	2.40358
10	69220303	69267560	+	HKDC1	0.512691	2.40344
2	96536743	96552639	+	ARID5A	0.827259	2.39593
1	2586491	2591470	+	FAM213B	0.512691	2.39073
10	88935074	88991391	-	ACTA2	0.827259	2.38722
19	925781	975935	+	ARID3A	0.275234	2.38406
16	11668414	11679160	+	SNN	0.12663	2.38209
19	47819779	47843331	+	CRX	0.275234	2.37678
X	71096197	71103536	+	FOXO4	0.12663	2.37403
8	119873717	120050914	+	DEPTOR	0.512691	2.37002
19	40348456	40380440	+	PLD3	0.275234	2.36964
14	54567097	54793316	+	SAMD4A	0.275234	2.3693
3	143265222	143848532	-	SLC9A9	0.827259	2.36668
12	105235290	105396098	+	C12orf75	0.512691	2.36074
20	64049836	64072348	+	TCEA2	0.275234	2.35655
9	76385517	76394518	-	RFK	0.512691	2.35447
4	128292751	128519395	+	RP11-420A23.1	0.12663	2.35194
11	66520637	66546239	-	ZDHHC24	0.275234	2.35088
20	50731544	50756796	+	PARD6B	0.275234	2.3431
12	56521929	56596197	+	RBMS2	0.275234	2.3423
1	116574399	116667756	-	IGSF3	0.275234	2.34125
19	1040101	1065573	+	ABCA7	0.12663	2.34072
11	95089810	95132646	+	ENDOD1	0.827259	2.329
9	131258076	131276548	-	FAM78A	0.512691	2.32834
20	44302838	44311170	-	FITM2	0.12663	2.32442
9	127611760	127692937	+	STXBP1	0.12663	2.31962
15	43628503	43668119	-	CATSPER2	0.275234	2.31104
1	202724491	202809471	-	KDM5B	0.275234	2.3094
16	77722492	77742261	+	NUDT7	0.512691	2.30817
15	82659281	82709915	-	AP3B2	0.275234	2.30672
12	63844293	64162222	+	SRGAP1	0.827259	2.30239
4	47485288	47593487	+	ATP10D	0.827259	2.30232
7	100177563	100221489	+	STAG3	0.275234	2.30101
17	68420948	68457514	-	WIPI1	0.512691	2.29832
7	5592823	5606656	+	FSCN1	0.275234	2.29598
5	181193924	181205294	-	TRIM7	0.512691	2.29479
8	144148016	144261941	+	MROH1	0.275234	2.28668
19	40592883	40629819	+	LTBP4	0.275234	2.28484
17	7402975	7404138	-	TMEM256	0.275234	2.28306
1	94927566	94963271	+	RP4-639F20.1	0.512691	2.28298
1	111431046	111433069	-	RP11-552M11.8	0.12663	2.28083
17	17810399	17837003	-	SREBF1	0.275234	2.27857
4	104468312	104494902	-	CXXC4	0.275234	2.27848
6	41934933	42050358	-	CCND3	0.827259	2.2771
3	196706277	196712294	-	CEP19	0.12663	2.27551
12	101877351	102012131	+	DRAM1	0.275234	2.27381
15	70829130	70854160	-	LARP6	0.12663	2.27264
6	111556454	111606279	-	TRAF3IP2	0.827259	2.27185
8	94925972	94949412	-	TP53INP1	0.275234	2.27053
1	44635238	44674556	-	TMEM53	0.12663	2.26858
19	11322046	11346271	-	RAB3D	0.275234	2.2669
X	152638183	152657535	+	GABRQ	0.12663	2.26568
9	79571773	79726883	+	TLE4	0.512691	2.26533
10	92046692	92291088	-	CPEB3	0.512691	2.26331
X	119291529	119335611	+	RP5-1139I1.1	0.512691	2.26305
19	11797667	11809623	+	ZNF491	0.275234	2.26141
19	45379634	45406350	-	PPP1R13L	0.12663	2.26071
5	172325181	172454524	-	SH3PXD2B	0.275234	2.26047
4	151102751	151325633	-	SH3D19	0.275234	2.25187
17	29073517	29180413	-	MYO18A	0.275234	2.25108
11	62337448	62393413	+	ASRGL1	0.512691	2.24846
10	119207589	119459743	+	GRK5	0.12663	2.24754
10	73253759	73358860	-	CFAP70	0.12663	2.24747
1	16197854	16212610	-	ARHGEF19	0.275234	2.2435
12	111405948	111451624	+	SH2B3	0.827259	2.24006
17	5499427	5619425	-	NLRP1	0.275234	2.23932
7	93099513	93118024	-	SAMD9	0.512691	2.23842
1	203626561	203744082	+	ATP2B4	0.512691	2.23289
19	708939	748330	+	PALM	0.275234	2.23064
19	5680604	5688524	+	HSD11B1L	0.275234	2.22937
2	48529383	48598514	+	STON1	0.512691	2.22584
12	121712752	121783002	+	TMEM120B	0.275234	2.22248
11	128458761	128587559	-	ETS1	0.512691	2.22009
19	48321509	48330554	+	EMP3	0.512691	2.21027
12	57095408	57132140	-	STAT6	0.275234	2.20941
8	80967810	81112069	-	PAG1	0.275234	2.20835
4	79901149	80125455	-	ANTXR2	0.275234	2.20632
7	137381037	137847093	-	DGKI	0.512691	2.20596
19	45488777	45502511	+	PPM1N	0.275234	2.20554
20	50118254	50153735	-	TMEM189	0.12663	2.20551
17	38419280	38512393	+	ARHGAP23	0.512691	2.20282
1	112701106	112707435	-	RHOC	0.275234	2.1994
1	153618787	153631361	-	S100A13	0.512691	2.19852
11	100687653	100991938	+	ARHGAP42	0.275234	2.19721
6	41683978	41736260	-	TFEB	0.275234	2.19489
19	39943239	39943681	-	PRR13P5	0.275234	2.19472
2	218607765	218637185	+	PLCD4	0.512691	2.19416
X	49187804	49200260	-	SYP	0.275234	2.19357
20	50081124	50153638	-	TMEM189-UBE2V1	0.512691	2.19233
14	22871613	22881581	+	LRP10	0.275234	2.1915
7	129144892	129169698	+	TSPAN33	0.275234	2.19137
X	124375903	124963818	-	TENM1	0.512691	2.18578
17	7380534	7389775	+	TNK1	0.512691	2.18383
22	25564849	25729295	+	ADRBK2	0.275234	2.1815
19	8206736	8262422	+	CERS4	0.12663	2.17892
15	64911902	64958701	+	ANKDD1A	0.512691	2.17656
1	109910242	109930993	+	CSF1	0.827259	2.1754
1	92167052	92184724	+	KIAA1107	0.275234	2.17526
19	40466241	40576465	+	SPTBN4	0.275234	2.17388
21	45981737	46005051	+	COL6A1	0.827259	2.1713
14	104865280	104896771	+	CEP170B	0.512691	2.17129
16	67438014	67481238	-	ATP6V0D1	0.512691	2.16993
5	149406689	149428679	+	CARMN	0.275234	2.16957
19	44662278	44684360	+	CEACAM19	0.275234	2.16792
19	5904858	5910854	+	VMAC	0.512691	2.16753
1	34981533	35031742	-	RP11-244H3.4	0.12663	2.16623
5	17065598	17276844	+	BASP1	0.512691	2.1655
1	155063731	155069554	+	EFNA4	0.12663	2.16404
19	41350911	41384084	+	TMEM91	0.827259	2.16172
9	137007227	137028923	-	ABCA2	0.275234	2.15689
12	6873569	6914244	+	LRRC23	0.512691	2.15502
22	31064105	31104758	+	SMTN	0.512691	2.15481
9	137077501	137084540	+	UAP1L1	0.512691	2.15367
1	109656081	109674837	+	GSTM4	0.512691	2.15283
5	172768090	172771196	-	DUSP1	0.12663	2.15191
7	5274369	5306871	+	SLC29A4	0.12663	2.15079
19	35935358	35945768	+	LRFN3	0.275234	2.14848
19	11344684	11354945	+	CCDC159	0.512691	2.14217
19	21932958	22010950	-	ZNF208	0.512691	2.14087
7	149102784	149126347	-	ZNF425	0.275234	2.13984
12	47753916	47782754	+	SLC48A1	0.12663	2.13681
22	38778508	38794199	-	DNAL4	0.827259	2.1368
2	14632686	14650815	+	FAM84A	0.275234	2.13544
19	11355386	11365699	+	PLPPR2	0.275234	2.13406
1	18904281	18956687	-	IFFO2	0.275234	2.13323
7	43582758	43626787	+	STK17A	0.827259	2.13237
12	109116595	109268227	+	ACACB	0.12663	2.13017
1	97077743	97921050	-	DPYD	0.275234	2.13008
4	101347780	101348884	+	FLJ20021	0.275234	2.12881
2	62196113	62224732	+	B3GNT2	0.275234	2.128
1	183636085	183928532	+	RGL1	0.275234	2.12755
16	67154180	67160299	-	TRADD	0.275234	2.12323
12	51391317	51515764	+	SLC4A8	0.512691	2.12167
1	9100305	9129171	-	GPR157	0.12663	2.11957
2	98997261	99154965	-	TSGA10	0.827259	2.11555
9	71683366	71816691	-	TMEM2	0.275234	2.11303
19	2714567	2721419	-	DIRAS1	0.275234	2.10943
1	201622885	201826970	+	NAV1	0.275234	2.10529
4	102631488	102760995	-	MANBA	0.512691	2.10523
15	40872214	40874290	-	RHOV	0.275234	2.09715
2	189031896	189179880	-	COL5A2	0.512691	2.09548
X	49879948	49882566	+	USP27X	0.275234	2.09308
11	66590176	66593084	-	CCDC87	0.12663	2.093
2	174559572	174682917	-	WIPF1	0.12663	2.08908
1	85580761	85583963	+	CYR61	0.275234	2.08756
16	67148105	67151215	-	B3GNT9	0.827259	2.08684
16	29459889	29464977	+	SULT1A4	0.512691	2.08642
17	12789539	12991644	+	ARHGAP44	0.512691	2.0861
19	13906201	13930880	+	CC2D1A	0.512691	2.08538
8	123497889	123541207	-	FBXO32	0.512691	2.08415
4	123396795	123403761	+	SPRY1	0.275234	2.08215
16	67943474	67969602	-	SLC12A4	0.275234	2.07719
1	158175850	158177756	-	ELL2P1	0.12663	2.07366
9	76419850	76507417	+	GCNT1	0.275234	2.07237
19	35855861	35867110	+	KIRREL2	0.512691	2.07056
20	20389552	20712489	-	RALGAPA2	0.12663	2.07049
17	72121020	72126421	+	SOX9	0.275234	2.07024
6	37170203	37175427	+	PIM1	0.827259	2.06641
9	123109494	123115478	-	MIR600HG	0.12663	2.06606
11	65314818	65322430	+	CDC42EP2	0.12663	2.06318
11	112961247	113278437	+	NCAM1	0.512691	2.06018
10	87357668	87370696	+	NUTM2D	0.275234	2.05853
1	111680630	111755825	-	FAM212B	0.827259	2.0548
2	40097270	40611054	-	SLC8A1	0.827259	2.05453
3	123610049	123884332	-	MYLK	0.827259	2.05423
2	202034587	202038446	+	FZD7	0.12663	2.05164
12	53708517	53727746	-	CALCOCO1	0.275234	2.05066
19	1392170	1396468	-	AC005329.7	0.275234	2.04807
2	111898479	112029562	+	MERTK	0.512691	2.04656
5	473236	480885	+	CTD-2228K2.7	0.512691	2.04549
11	9664077	9752992	+	SWAP70	0.12663	2.04541
12	123762188	123936207	+	DNAH10	0.827259	2.04447
2	204545793	205620163	+	PARD3B	0.512691	2.04405
10	101031234	101041245	+	SFXN3	0.12663	2.04355
9	34638133	34651036	+	GALT	0.12663	2.04296
21	44932814	44939914	-	LINC01547	0.275234	2.04253
6	112087599	112102791	+	FAM229B	0.12663	2.04235
6	26172059	26184656	+	HIST1H2BE	0.12663	2.04144
12	6913745	6923699	+	ENO2	0.275234	2.04037
19	38211006	38229715	-	DPF1	0.512691	2.03783
3	192796815	192918162	-	MB21D2	0.512691	2.0338
14	96039324	96094081	+	C14orf132	0.512691	2.03168
6	34246380	34249471	-	C6orf1	0.275234	2.03069
7	4797055	4883720	-	RADIL	0.275234	2.03066
X	49269843	49301462	+	PPP1R3F	0.275234	2.02653
9	111525159	111577845	+	ZNF483	0.275234	2.02622
6	148272304	148552051	+	SASH1	0.512691	2.02595
4	140388455	140427969	-	CLGN	0.275234	2.02389
15	90083045	90102505	-	IDH2	0.275234	2.0231
20	3927309	4015583	-	RNF24	0.275234	2.02183
15	32593456	32607311	+	GOLGA8N	0.512691	2.01872
X	10445310	10833655	-	MID1	0.512691	2.01594
11	65497762	65506517	+	MALAT1	0.512691	2.01447
4	151409216	151663633	+	FAM160A1	0.512691	2.01093
19	10566462	10569060	-	CDKN2D	0.275234	2.01084
20	35954564	36030701	+	CNBD2	0.275234	2.00893
8	66712418	66862023	+	SGK3	0.275234	2.0085
11	3087116	3166740	-	OSBPL5	0.12663	2.00626
12	53441605	53446646	+	PRR13	0.275234	2.00532
19	5911707	5916209	+	CAPS	0.12663	2.00482
11	6395124	6419415	-	APBB1	0.512691	2.00369
3	13479724	13506425	+	HDAC11	0.275234	2.00277
14	75427716	75474112	+	JDP2	0.512691	2.00206
X	18425583	18653630	+	CDKL5	0.275234	2.0019
2	46293667	46386704	+	EPAS1	0.275234	2.00098
4	77157151	77433389	+	CCNG2	0.512691	1.99981
14	90396502	90408262	+	CALM1	0.12663	1.99795
3	129555175	129606819	-	PLXND1	0.275234	1.99728
X	55452105	55453567	+	MAGEH1	0.275234	1.99688
5	151020438	151028994	+	GPX3	0.275234	1.99668
19	48872392	48876058	+	PPP1R15A	0.12663	1.99571
13	39342892	39603529	-	LHFP	0.827259	1.99561
11	64917553	64934474	+	PPP2R5B	0.0495346	1.99558
7	99013165	99048241	+	AC004893.11	0.827259	1.9955
11	66592821	66606020	+	CCS	0.12663	1.99437
14	20365667	20413430	-	TEP1	0.512691	1.99298
17	8287763	8295344	-	SLC25A35	0.512691	1.99224
5	136028895	136063819	+	TGFBI	0.275234	1.99223
2	196967017	197311174	-	ANKRD44	0.275234	1.9917
7	105876796	106033774	+	CDHR3	0.512691	1.99148
2	219249711	219278171	-	TUBA4A	0.512691	1.98828
8	85220587	85284074	+	CA13	0.512691	1.98655
11	123454398	123627775	+	GRAMD1B	0.512691	1.98572
10	100373615	100383369	+	OLMALINC	0.275234	1.98535
8	131904088	132013643	+	EFR3A	0.0495346	1.984
2	11155198	11178875	+	PQLC3	0.275234	1.98374
19	35867899	35879792	+	APLP1	0.12663	1.98313
12	53014596	53054439	-	RP11-983P16.4	0.275234	1.98305
17	7839904	7854797	+	KDM6B	0.0495346	1.98187
19	12461184	12513855	-	ZNF709	0.275234	1.98172
1	23428563	23484569	-	ASAP3	0.12663	1.98081
3	142949164	142963683	-	PAQR9	0.827259	1.98052
1	99708703	99766632	-	FRRS1	0.827259	1.98033
16	11547722	11636382	-	LITAF	0.275234	1.97986
19	10221435	10231273	-	S1PR2	0.275234	1.97867
7	100539211	100568220	+	AGFG2	0.827259	1.97723
17	56593699	56595591	+	NOG	0.512691	1.97535
11	405716	417456	-	SIGIRR	0.12663	1.97486
7	105565120	105600876	-	EFCAB10	0.827259	1.97457
17	10628526	10657310	-	MYH3	0.512691	1.97407
X	49071156	49074072	-	PRAF2	0.12663	1.97327
1	154944076	154956124	-	PBXIP1	0.12663	1.97201
9	97029679	97039644	-	CTSV	0.512691	1.97013
15	85759323	85795031	-	KLHL25	0.512691	1.9701
19	7395113	7472478	+	ARHGEF18	0.512691	1.9693
2	20560448	20651090	-	HS1BP3	0.12663	1.969
17	40309192	40357644	+	RARA	0.275234	1.96812
5	69186359	69189453	-	CTC-351M12.1	0.12663	1.96741
X	54192823	54358643	-	WNK3	0.275234	1.96598
18	8705661	8832779	+	MTCL1	0.275234	1.96585
17	73165012	73176634	+	SSTR2	0.512691	1.96412
11	36296288	36465205	+	PRR5L	0.512691	1.96208
17	8368637	8376712	-	KRBA2	0.827259	1.96099
11	120511759	120988905	+	GRIK4	0.275234	1.96048
6	159969099	160113508	+	IGF2R	0.512691	1.96027
16	56682424	56684197	+	MT1X	0.0495346	1.95788
3	33277025	33403663	+	FBXL2	0.0495346	1.95554
14	75278774	75282231	+	FOS	0.275234	1.95538
12	69738681	69823205	+	RAB3IP	0.512691	1.95311
6	31857659	31862907	-	NEU1	0.275234	1.95205
17	7351889	7354945	+	KCTD11	0.275234	1.95134
6	68635367	69389512	+	ADGRB3	0.827259	1.94933
19	17468769	17506169	+	SLC27A1	0.12663	1.94617
22	43039644	43089429	-	TTLL1	0.275234	1.94518
3	194584011	194590261	+	TMEM44-AS1	0.12663	1.94379
12	55716036	55724704	+	RP11-644F5.10	0.512691	1.94377
17	20009344	20319027	+	SPECC1	0.275234	1.94372
14	23047062	23057539	-	CDH24	0.827259	1.94282
15	74202705	74221558	+	RP11-60L3.1	0.512691	1.94199
6	42224931	42452052	-	TRERF1	0.275234	1.94002
15	91099950	91301310	+	SV2B	0.827259	1.9373
22	30368811	30421772	-	RNF215	0.0495346	1.93648
9	129094810	129111190	-	CRAT	0.275234	1.93591
7	76461676	76505996	+	DTX2	0.275234	1.93492
11	78188812	78214712	+	USP35	0.12663	1.93453
1	11654375	11663328	+	FBXO44	0.12663	1.93383
1	102876467	103108497	-	COL11A1	0.512691	1.93262
12	96194382	96269836	+	ELK3	0.275234	1.93123
16	58025566	58046902	+	MMP15	0.275234	1.93
2	39436637	39665344	+	AC007246.3	0.275234	1.92832
20	33407955	33443893	-	SNTA1	0.275234	1.9283
7	76302544	76304296	+	HSPB1	0.512691	1.92702
19	11848726	11883751	+	ZNF439	0.0495346	1.92663
8	108606850	108787616	-	TMEM74	0.275234	1.9259
6	29941260	29945885	+	HLA-A	0.827259	1.9258
1	11806096	11843145	+	CLCN6	0.827259	1.92508
2	71182739	71227084	-	PAIP2B	0.275234	1.92503
1	154962298	154974396	-	SHC1	0.275234	1.92377
7	66075798	66093559	+	ASL	0.275234	1.92031
3	50299889	50312382	-	HYAL1	0.512691	1.91792
11	560404	564022	+	RASSF7	0.512691	1.91788
2	37641882	37738469	-	CDC42EP3	0.275234	1.91786
6	152121684	152637802	-	SYNE1	0.512691	1.91764
5	1050376	1112036	-	SLC12A7	0.827259	1.91713
9	113150942	113164138	+	SLC31A2	0.12663	1.91692
17	45393902	45434422	-	ARHGAP27	0.512691	1.91662
16	70252295	70289544	-	AARS	0.827259	1.91627
15	34494420	34495901	+	FSCN1P1	0.275234	1.91563
12	49568218	49644667	+	PRPF40B	0.275234	1.91517
17	62627401	62693598	+	MRC2	0.827259	1.91498
13	35474182	35477210	-	MAB21L1	0.827259	1.91432
17	4143168	4187311	+	CYB5D2	0.275234	1.91395
6	75749192	75919538	+	MYO6	0.0495346	1.91346
1	164356767	164357365	+	HMGB3P6	0.827259	1.9129
10	116881482	117126587	-	SHTN1	0.512691	1.90902
12	31671137	31729175	-	AMN1	0.512691	1.90756
19	49506816	49526334	+	FCGRT	0.275234	1.9065
7	101154397	101161597	+	AP1S1	0.275234	1.90648
X	46573784	46598409	+	CHST7	0.827259	1.90643
11	100991989	100993942	+	TMEM133	0.275234	1.90513
17	81029130	81034882	-	BAIAP2-AS1	0.512691	1.90393
8	26379259	26382954	-	SDAD1P1	0.275234	1.90283
1	108560089	108644901	+	FAM102B	0.275234	1.90123
6	31815464	31817947	+	HSPA1A	0.827259	1.90026
5	10564330	10657817	+	ANKRD33B	0.512691	1.89772
7	74882163	74890611	-	STAG3L2	0.275234	1.89651
5	141094578	141098704	+	PCDHB2	0.512691	1.89641
7	71132169	71713601	+	WBSCR17	0.275234	1.89638
12	47972965	48004487	-	COL2A1	0.512691	1.89562
12	92140278	92145898	-	BTG1	0.512691	1.8947
1	156815640	156881851	+	NTRK1	0.512691	1.89464
X	49028726	49043487	-	TFE3	0.512691	1.89418
16	58059	76356	-	RHBDF1	0.275234	1.89399
7	102573807	102616758	-	RASA4	0.275234	1.89376
11	1752752	1763993	-	CTSD	0.275234	1.89295
3	48517684	48562016	-	PFKFB4	0.275234	1.89198
1	148808181	149048287	+	PDE4DIP	0.275234	1.89104
20	63558086	63574240	-	HELZ2	0.512691	1.89102
7	27170591	27180262	-	HOXA10	0.827259	1.89051
5	78342365	78360508	-	SCAMP1-AS1	0.512691	1.88943
14	75578617	75663215	+	FLVCR2	0.827259	1.88881
1	26279176	26281523	+	SH3BGRL3	0.0495346	1.88837
1	151131685	151146665	-	SEMA6C	0.275234	1.88832
4	6269849	6303266	+	WFS1	0.275234	1.88777
18	27950966	28177447	-	CDH2	0.827259	1.88705
2	127048027	127107356	-	BIN1	0.275234	1.88682
1	26529761	26575031	+	RPS6KA1	0.275234	1.88614
2	201233443	201287712	+	CASP8	0.512691	1.88456
11	128965060	129279325	-	ARHGAP32	0.512691	1.88358
12	27332854	27425290	+	ARNTL2	0.827259	1.88327
20	50190734	50192690	+	CEBPB	0.512691	1.88223
12	111360651	111369122	-	FAM109A	0.12663	1.88114
12	31647160	31673115	+	METTL20	0.0495346	1.881
12	19129752	19376401	+	PLEKHA5	0.275234	1.88048
20	21499261	21502935	-	RP5-984P4.6	0.827259	1.87993
1	23557918	23559795	-	ID3	0.12663	1.87876
17	42458844	42522612	+	ATP6V0A1	0.275234	1.87842
16	28284885	28292065	-	RP11-57A19.2	0.275234	1.87817
19	55785397	55836801	-	NLRP11	0.827259	1.87704
21	8210384	8211307	-	CH507-513H4.6	0.512691	1.87685
19	9853718	9936553	-	OLFM2	0.512691	1.87577
1	76074719	76634602	+	ST6GALNAC3	0.275234	1.87397
8	22114415	22133385	-	HR	0.275234	1.87382
1	25543580	25568887	+	LDLRAP1	0.0495346	1.87318
6	73593379	73654156	-	SLC17A5	0.0495346	1.87078
10	22316388	22329543	+	COMMD3-BMI1	0.0495346	1.8684
X	43654907	43746825	+	MAOA	0.512691	1.86837
2	31234337	31269448	+	EHD3	0.512691	1.86768
6	46220736	46491973	-	RCAN2	0.0495346	1.8671
6	33572547	33580294	-	BAK1	0.512691	1.86697
19	4174109	4182605	-	SIRT6	0.275234	1.86657
5	76403249	76708133	+	IQGAP2	0.512691	1.86585
4	173363780	173370447	-	RP11-798M19.6	0.0495346	1.86511
17	59618553	59619715	-	RP11-758H9.2	0.0495346	1.86424
1	11785723	11806921	-	MTHFR	0.0495346	1.86232
4	112285509	112442621	+	ALPK1	0.275234	1.86207
7	101313367	101321824	-	IFT22	0.512691	1.86113
11	83455012	85627923	-	DLG2	0.275234	1.86005
19	6729914	6737604	-	GPR108	0.275234	1.85891
3	185190624	185281991	-	EHHADH	0.827259	1.85877
7	43758680	43807343	+	BLVRA	0.275234	1.85768
7	75842602	75888927	+	RHBDD2	0.827259	1.85537
19	49527618	49546963	+	RCN3	0.0495346	1.85428
19	46466491	46471564	-	PNMAL1	0.512691	1.85265
6	18155329	18223854	+	KDM1B	0.12663	1.85223
4	13540830	13545051	-	NKX3-2	0.512691	1.85133
19	4815932	4831705	-	TICAM1	0.827259	1.85003
1	225810092	225845564	+	EPHX1	0.512691	1.84931
3	32105689	32168714	+	GPD1L	0.275234	1.84774
12	25939329	25959766	-	RASSF8-AS1	0.275234	1.84711
22	40410281	40636703	-	MKL1	0.275234	1.84491
9	113313222	113340299	-	WDR31	0.275234	1.84477
11	67303448	67312608	+	SSH3	0.275234	1.84472
8	38728186	38853029	+	TACC1	0.275234	1.8447
19	10333436	10336249	+	AC114271.2	0.512691	1.84316
14	22598237	22613216	+	ABHD4	0.0495346	1.8428
4	38867677	38945740	+	FAM114A1	0.12663	1.84253
1	43699765	43708139	-	KDM4A-AS1	0.12663	1.84252
19	38305104	38317274	-	YIF1B	0.275234	1.84152
9	128724445	128733195	+	RP11-545E17.3	0.275234	1.83925
9	34989641	34998901	+	DNAJB5	0.275234	1.83893
11	65585395	65650931	+	SIPA1	0.827259	1.83817
3	101324205	101513242	-	SENP7	0.12663	1.8363
4	46248427	46475231	-	GABRA2	0.275234	1.83593
19	14147743	14206188	-	ADGRL1	0.0495346	1.83556
19	45710629	45730905	-	FBXO46	0.512691	1.83475
12	55681546	55684612	+	METTL7B	0.512691	1.83449
11	61873519	61892052	-	FADS3	0.0495346	1.83279
10	89414586	89421002	+	IFIT5	0.827259	1.83239
14	76781733	76786725	-	RP11-488C13.5	0.512691	1.83147
15	45361124	45402328	-	GATM	0.275234	1.83111
20	34844720	34872861	-	GGT7	0.12663	1.82978
X	53082367	53088541	+	TSPYL2	0.275234	1.8285
12	106301929	106347016	+	TCP11L2	0.275234	1.82827
6	132445867	132513199	-	STX7	0.512691	1.82769
17	44353215	44363876	-	FAM171A2	0.827259	1.82766
8	23841915	23854808	-	STC1	0.512691	1.82652
6	109444062	109465969	-	MICAL1	0.512691	1.82642
8	141391993	141432455	+	PTP4A3	0.512691	1.82629
3	49121114	49133119	-	LAMB2	0.512691	1.82599
22	30635652	30669017	+	SLC35E4	0.827259	1.8256
17	1858039	1858447	-	AC016292.3	0.827259	1.82554
17	64749663	64781708	-	RP13-104F24.2	0.0495346	1.82338
1	169394870	169460670	-	CCDC181	0.275234	1.82304
19	41966582	41997498	-	ATP1A3	0.275234	1.82289
3	196988621	197029817	-	MFI2	0.275234	1.82288
X	155276211	155334658	-	CLIC2	0.827259	1.82219
10	114120862	114174221	-	CCDC186	0.12663	1.82173
19	17226204	17229220	+	OCEL1	0.12663	1.82095
19	40393768	40413367	-	PRX	0.0495346	1.81899
16	30114105	30123507	-	MAPK3	0.275234	1.81815
1	236215555	236281986	-	ERO1B	0.275234	1.81563
6	39899578	39934552	-	MOCS1	0.275234	1.8151
5	95885098	95962072	-	ELL2	0.0495346	1.81445
1	109309568	109397952	-	SORT1	0.512691	1.81382
12	113221050	113298586	+	TPCN1	0.512691	1.81108
14	23561097	23568074	+	RP11-66N24.3	0.512691	1.80466
10	73995193	74121364	+	VCL	0.12663	1.80433
16	30092314	30096916	-	YPEL3	0.275234	1.8043
9	116425225	117415071	-	ASTN2	0.512691	1.80141
10	22534849	22714556	-	PIP4K2A	0.512691	1.80109
12	55829745	55836247	+	TMEM198B	0.275234	1.80081
14	104800596	104804713	+	ZBTB42	0.12663	1.80049
20	62307955	62367313	-	LAMA5	0.0495346	1.79648
20	17613678	17682296	-	RRBP1	0.275234	1.79646
1	165768929	165775177	+	RP11-466F5.8	0.275234	1.79537
3	197671393	197749728	-	RUBCN	0.275234	1.79477
12	101745497	101830939	-	GNPTAB	0.512691	1.79463
17	44175973	44186718	-	ASB16-AS1	0.12663	1.79417
14	29576479	30191899	-	PRKD1	0.512691	1.79338
17	75751594	75765712	-	GALK1	0.275234	1.79333
1	32200386	32205388	+	CCDC28B	0.275234	1.79106
11	124800450	124834488	+	RP11-677M14.7	0.12663	1.7909
14	24311450	24318037	+	LTB4R	0.512691	1.79079
19	47778572	47784687	+	SEPW1	0.275234	1.79029
14	63684214	63728040	-	SGPP1	0.512691	1.78903
12	119178642	119221132	+	HSPB8	0.512691	1.7888
X	153724868	153744763	+	ABCD1	0.512691	1.7873
8	139730343	140458580	-	TRAPPC9	0.512691	1.78657
16	30193887	30197562	+	SLX1A	0.512691	1.78599
2	229922302	230013110	+	FBXO36	0.827259	1.78599
12	56341597	56360156	-	STAT2	0.12663	1.78568
19	55282072	55312534	+	BRSK1	0.512691	1.78534
17	21524790	21574459	-	C17orf51	0.512691	1.78507
5	16661914	16936277	-	MYO10	0.275234	1.78464
7	103471784	103989517	-	RELN	0.512691	1.78351
15	85380571	85749359	+	AKAP13	0.275234	1.78312
15	90352245	90369147	+	ZNF774	0.275234	1.78299
16	715115	719656	+	METRN	0.12663	1.78267
6	35342558	35428192	+	PPARD	0.12663	1.78147
17	7189890	7219703	-	DLG4	0.275234	1.78089
4	140620765	140756121	-	TBC1D9	0.275234	1.78061
3	58008400	58172252	+	FLNB	0.12663	1.77971
4	958887	986896	-	DGKQ	0.512691	1.7788
4	52712404	52720352	+	DANCR	0.512691	1.77852
8	29333064	29350669	-	DUSP4	0.275234	1.77791
17	80415165	80438087	+	ENDOV	0.275234	1.77733
17	38702452	38704748	+	CTB-58E17.1	0.275234	1.77718
1	232983435	233295714	-	PCNXL2	0.275234	1.77642
11	123430737	123435711	+	AP000783.1	0.827259	1.77442
16	70807378	71230723	-	HYDIN	0.827259	1.77403
5	113022099	113488831	-	MCC	0.275234	1.77391
1	85318481	85578364	-	DDAH1	0.275234	1.77294
8	19901717	19967259	+	LPL	0.827259	1.77239
11	65111845	65116385	+	TM7SF2	0.0495346	1.77057
15	101175723	101251933	-	CHSY1	0.827259	1.76951
9	96639577	96655304	-	AAED1	0.512691	1.76898
7	44004046	44007867	-	AC004951.6	0.275234	1.76862
17	7012417	7014533	+	RNASEK	0.512691	1.7686
17	74862497	74873032	-	FDXR	0.0495346	1.76833
19	17747718	17788569	+	FCHO1	0.0495346	1.76759
17	27456714	27626439	+	KSR1	0.275234	1.76688
11	118994824	118998005	-	RP11-110I1.12	0.275234	1.76549
2	120240064	120294714	+	RALB	0.512691	1.76371
19	9363020	9382618	+	ZNF177	0.512691	1.76325
3	122680618	122730841	+	PARP14	0.827259	1.76189
1	205657851	205680460	-	SLC45A3	0.12663	1.76167
1	185734551	186190950	+	HMCN1	0.275234	1.76088
3	194136145	194138733	+	HES1	0.512691	1.76083
6	33620365	33696575	+	ITPR3	0.275234	1.75905
4	107931369	107953458	+	CYP2U1	0.275234	1.75876
1	149903318	149917883	-	SV2A	0.275234	1.75868
15	90868592	90883459	+	FURIN	0.275234	1.75825
11	105995623	106022404	-	MSANTD4	0.275234	1.75664
2	197453423	197475309	+	COQ10B	0.512691	1.75545
X	49175264	49186529	-	PRICKLE3	0.827259	1.75539
5	151437046	151492382	+	SLC36A1	0.12663	1.75505
13	57631810	57729312	+	PCDH17	0.827259	1.75472
2	74532414	74555691	-	LOXL3	0.512691	1.75397
19	43506719	43527245	-	ETHE1	0.512691	1.751
17	59331689	59401730	+	YPEL2	0.275234	1.75054
7	39833571	39834719	+	AC004987.9	0.12663	1.75048
17	75525080	75575209	+	LLGL2	0.827259	1.74912
11	66466327	66477338	+	PELI3	0.12663	1.74853
19	12875211	12881469	-	DNASE2	0.512691	1.74822
2	30146941	30160534	+	YPEL5	0.275234	1.74759
10	119029716	119033733	+	NANOS1	0.275234	1.74718
2	191678068	191696660	+	NABP1	0.512691	1.74669
9	113373419	113377000	-	HDHD3	0.0495346	1.74554
X	38561370	38688921	+	TSPAN7	0.275234	1.74503
19	8580242	8610736	-	ADAMTS10	0.275234	1.74471
7	149872968	149880699	+	ATP6V0E2	0.0495346	1.74433
6	5972412	5974013	+	PKMP5	0.12663	1.74323
10	102918293	103090222	+	CNNM2	0.0495346	1.74265
17	80036632	80100614	+	CCDC40	0.275234	1.74163
19	4639518	4655569	+	TNFAIP8L1	0.275234	1.74053
3	142157527	142225608	-	GK5	0.827259	1.74022
4	168497066	168928458	+	PALLD	0.275234	1.73905
19	45769717	45782553	-	DMPK	0.512691	1.73726
6	32821833	32838781	-	TAP2	0.512691	1.73703
11	118606440	118658039	+	PHLDB1	0.512691	1.7363
13	78598362	78603561	-	POU4F1	0.12663	1.73616
22	20017014	20065927	+	TANGO2	0.827259	1.73614
19	43474954	43504936	-	PHLDB3	0.275234	1.73572
3	132558138	132660724	-	ACAD11	0.275234	1.73568
6	110609978	110815959	-	CDK19	0.512691	1.73559
9	105244622	105439172	+	SLC44A1	0.0495346	1.73503
3	64515654	64688001	-	ADAMTS9	0.512691	1.73464
1	3625002	3630128	+	TPRG1L	0.275234	1.73428
6	39188973	39229451	-	KCNK5	0.827259	1.73382
19	40440844	40444706	-	SERTAD3	0.512691	1.73245
X	54920462	54931432	+	TRO	0.275234	1.73134
1	89993593	89994322	-	GEMIN8P4	0.275234	1.72937
8	76681219	76867286	+	ZFHX4	0.512691	1.72912
17	7913324	7915954	-	AC025335.1	0.512691	1.72693
17	68267026	68291268	-	SLC16A6	0.827259	1.72663
4	112818109	113383741	+	ANK2	0.827259	1.72585
4	140859807	141212878	-	RNF150	0.275234	1.7253
14	24161053	24166566	+	IRF9	0.827259	1.72484
20	44694892	44746022	-	KCNK15-AS1	0.512691	1.7244
4	185500660	185535613	-	PDLIM3	0.512691	1.7237
11	86791059	86952911	+	PRSS23	0.512691	1.7229
11	15966449	16739592	-	SOX6	0.275234	1.72177
9	97411950	97496126	+	TDRD7	0.275234	1.72143
13	34942287	35673023	+	NBEA	0.12663	1.71929
14	54842008	54902853	-	GCH1	0.275234	1.71877
5	52787896	52959211	+	ITGA1	0.512691	1.71689
10	21756537	22003770	-	DNAJC1	0.275234	1.71505
5	149358007	149369654	+	PCYOX1L	0.275234	1.71334
17	43014605	43025124	-	VAT1	0.0495346	1.71034
8	17027238	17122645	+	MICU3	0.275234	1.71029
11	65027408	65040573	+	SNX15	0.827259	1.71009
8	106697427	106698014	-	TAGLN2P1	0.827259	1.70977
10	71319258	71363386	+	SLC29A3	0.0495346	1.70963
8	79764010	79767864	-	HEY1	0.0495346	1.70915
X	72127110	72131902	-	RGAG4	0.275234	1.70831
1	28369582	28500370	+	PHACTR4	0.827259	1.70751
5	138946720	139293558	-	SIL1	0.0495346	1.70707
3	49412206	49416476	+	TCTA	0.12663	1.70652
19	17405722	17433725	+	MVB12A	0.0495346	1.70607
5	139647299	139683883	+	CXXC5	0.827259	1.70585
1	120489625	120579191	-	CH17-472G23.4	0.275234	1.70542
5	151661096	151687166	-	SPARC	0.512691	1.70408
1	23801885	23838621	-	HMGCL	0.0495346	1.70364
3	53156009	53192718	+	PRKCD	0.827259	1.70364
1	9292880	9369533	+	SPSB1	0.12663	1.70363
17	39728496	39730788	-	MIEN1	0.12663	1.70294
5	132191838	132295316	-	P4HA2	0.275234	1.70275
10	28677342	28682940	+	BAMBI	0.512691	1.70141
22	21001886	21010343	+	THAP7-AS1	0.0495346	1.70078
7	1530714	1543044	+	MAFK	0.827259	1.70052
7	98291651	98401069	-	BAIAP2L1	0.275234	1.7004
9	39807361	39810064	-	GLIDR	0.827259	1.7004
3	93873033	93974067	-	PROS1	0.512691	1.69895
11	106051098	106077766	-	KBTBD3	0.12663	1.69767
22	44668547	44737682	+	PRR5	0.512691	1.6962
2	129992889	129994041	+	AC018865.5	0.275234	1.69535
6	41546426	41602385	+	FOXP4	0.275234	1.69323
7	66205199	66420544	+	TPST1	0.275234	1.693
17	4807096	4823435	+	PLD2	0.0495346	1.69276
3	56727418	57079330	-	ARHGEF3	0.512691	1.69228
11	118531041	118547281	+	TMEM25	0.275234	1.69214
10	79069035	79316529	+	ZMIZ1	0.512691	1.69166
2	8678845	8684454	+	ID2	0.827259	1.6907
1	109494052	109502933	+	CYB561D1	0.275234	1.69051
17	63695902	63701173	-	LIMD2	0.827259	1.68888
11	8612037	8671867	-	TRIM66	0.275234	1.68854
19	17719242	17734517	+	MAP1S	0.12663	1.68844
19	40355842	40360607	+	CTC-425O23.5	0.275234	1.68819
1	10456522	10472527	-	DFFA	0.12663	1.68761
6	71288803	71308951	+	OGFRL1	0.827259	1.68718
19	39412585	39428416	+	PLEKHG2	0.827259	1.68706
2	219498867	219506990	+	GMPPA	0.512691	1.68695
1	64833229	64966505	-	JAK1	0.827259	1.68695
16	75245994	75250078	-	RP11-331F4.5	0.275234	1.68592
4	1793307	1808873	+	FGFR3	0.512691	1.68567
9	87725519	87731394	+	CTSL	0.275234	1.68518
3	123067062	123225228	+	PDIA5	0.12663	1.68311
17	44076746	44123703	-	HDAC5	0.275234	1.68278
1	43525187	43623667	+	PTPRF	0.275234	1.682
3	45224466	45226279	-	TMEM158	0.275234	1.68158
15	51751561	51816369	+	TMOD2	0.12663	1.68144
19	2100988	2164466	-	AP3D1	0.275234	1.68078
6	28124560	28130083	+	ZSCAN16	0.275234	1.6805
15	40894430	40903976	+	VPS18	0.827259	1.68045
20	63639705	63657683	-	STMN3	0.512691	1.68022
11	126340889	126355588	-	ST3GAL4-AS1	0.275234	1.6787
19	18434388	18438302	-	ISYNA1	0.512691	1.67673
22	36226203	36239955	-	APOL2	0.512691	1.67667
19	48637942	48646313	-	CA11	0.275234	1.67661
4	2247432	2262295	-	MXD4	0.275234	1.67614
16	4245825	4253790	-	LINC01569	0.12663	1.67592
20	37344685	37406051	+	SRC	0.0495346	1.67574
15	41774434	41827856	+	MAPKBP1	0.512691	1.67527
4	625584	670783	+	PDE6B	0.512691	1.6752
19	3777970	3802130	-	MATK	0.827259	1.6742
19	3958453	3971124	-	DAPK3	0.12663	1.67384
9	136006537	136095286	-	NACC2	0.512691	1.67362
6	43182175	43224588	+	CUL9	0.12663	1.67355
2	26847747	26950352	+	DPYSL5	0.512691	1.67243
3	98657802	98660571	+	WWP1P1	0.512691	1.6724
20	49982999	49988887	+	SNAI1	0.275234	1.67216
22	25742144	26031042	+	MYO18B	0.275234	1.6717
1	83865028	83999151	-	TTLL7	0.12663	1.67167
1	114582848	114670423	-	DENND2C	0.275234	1.67113
10	92118664	92119165	+	SDHCP2	0.827259	1.67028
1	145992435	145996601	-	TXNIP	0.827259	1.67028
12	112125501	112153610	+	TRAFD1	0.512691	1.67006
17	8188333	8190908	-	BORCS6	0.827259	1.66835
6	69675802	69797112	-	LMBRD1	0.512691	1.66778
7	149838367	149867480	+	ZNF862	0.275234	1.66754
X	115561174	115650862	+	PLS3	0.275234	1.6675
15	69298947	69407781	+	PAQR5	0.0495346	1.66685
16	29679008	29698700	+	QPRT	0.0495346	1.66635
17	81509971	81523848	-	ACTG1	0.275234	1.66616
11	75260129	75262467	-	CTD-2562J17.6	0.275234	1.66496
19	3630183	3700480	-	PIP5K1C	0.275234	1.66405
X	48903180	48911959	-	SLC35A2	0.827259	1.66373
20	23626706	23638474	-	CST3	0.827259	1.66335
19	40740856	40751554	-	C19orf54	0.275234	1.6627
8	143990058	143993416	+	GRINA	0.275234	1.66221
X	48539457	48562610	+	TBC1D25	0.827259	1.6621
21	36069941	36073167	+	CBR1	0.512691	1.66106
4	83535914	83605876	+	GPAT3	0.512691	1.66028
1	156806243	156816863	-	SH2D2A	0.512691	1.66027
20	45890144	45898821	+	CTSA	0.512691	1.65847
1	9943428	9985502	+	NMNAT1	0.275234	1.65656
9	20658309	20995956	+	FOCAD	0.275234	1.6564
4	39546330	39639091	-	SMIM14	0.12663	1.65633
7	4775622	4794313	+	AP5Z1	0.512691	1.65608
19	7522626	7534010	+	MCOLN1	0.512691	1.65462
6	29555629	29633977	-	GABBR1	0.512691	1.65425
4	75913657	75941052	-	NAAA	0.827259	1.6542
14	64704102	64750248	+	PLEKHG3	0.827259	1.65381
2	128236716	128318578	-	HS6ST1	0.512691	1.65327
7	130506238	130668749	-	COPG2	0.12663	1.65315
1	224896262	225399293	+	DNAH14	0.827259	1.65205
X	81201943	81298548	+	SH3BGRL	0.827259	1.65111
6	134169246	134318113	-	SGK1	0.12663	1.65029
10	72273920	72276037	+	DDIT4	0.512691	1.65013
11	78215297	78418349	-	GAB2	0.512691	1.6498
19	2476122	2478260	+	GADD45B	0.0495346	1.64923
15	34102073	34108685	+	PGBD4	0.512691	1.64912
19	2819874	2835774	+	ZNF554	0.512691	1.64841
15	84655129	84658564	-	NMB	0.827259	1.64824
1	27325329	27325797	+	ACTG1P20	0.275234	1.64689
6	30676389	30687896	-	PPP1R18	0.275234	1.64617
4	122888697	122922969	-	NUDT6	0.275234	1.64614
7	108470422	108569667	-	PNPLA8	0.12663	1.6456
19	36034985	36054763	-	THAP8	0.275234	1.64558
5	154190730	154420985	+	GALNT10	0.0495346	1.64505
2	74654228	74683854	+	SEMA4F	0.12663	1.64391
8	143915147	143976735	-	PLEC	0.512691	1.6439
19	39863323	39934627	-	FCGBP	0.512691	1.64182
5	73626158	73941994	+	ARHGEF28	0.512691	1.64151
16	28974221	28984549	+	SPNS1	0.827259	1.64101
12	48766194	48789038	-	ADCY6	0.275234	1.64082
9	34650702	34661893	+	IL11RA	0.275234	1.64065
3	114338094	115147272	-	ZBTB20	0.512691	1.64059
22	24585620	24593209	-	LRRC75B	0.827259	1.64
16	69762306	69941742	+	WWP2	0.827259	1.63994
19	49766968	49807114	+	AP2A1	0.275234	1.63966
1	146298170	146298716	+	NUDT4P2	0.0495346	1.6395
1	39895426	39902257	-	MYCL	0.275234	1.6385
16	30199228	30204311	+	SULT1A3	0.512691	1.6385
18	49481681	49492480	-	RPL17-C18orf32	0.512691	1.63847
5	140174642	140282053	+	CYSTM1	0.512691	1.6372
X	108091668	108154672	+	ATG4A	0.275234	1.63675
19	56507843	56530222	+	ZNF471	0.275234	1.6362
1	16985958	17011929	-	ATP13A2	0.827259	1.63609
19	14119509	14136957	-	ASF1B	0.512691	1.63587
16	88651935	88663162	-	MVD	0.512691	1.63567
12	123470054	123533719	-	RILPL1	0.12663	1.63535
9	34366670	34376854	-	KIAA1161	0.275234	1.63514
3	170357678	170396836	+	SKIL	0.512691	1.63446
17	76735865	76781450	+	MFSD11	0.827259	1.63369
19	40691529	40718208	-	ADCK4	0.275234	1.63367
22	23070361	23125038	+	GNAZ	0.0495346	1.63324
12	55743280	55757279	+	GDF11	0.275234	1.63304
11	108505431	108593739	-	EXPH5	0.827259	1.63243
9	93096218	93113284	+	CARD19	0.12663	1.63223
1	38991223	39006060	+	AKIRIN1	0.275234	1.63191
10	23095506	23122014	+	MSRB2	0.0495346	1.63108
4	96902801	96903051	+	COX7A2P2	0.512691	1.63056
19	17292131	17310237	-	ABHD8	0.275234	1.63027
16	67518418	67546789	+	FAM65A	0.512691	1.63027
16	70454421	70480275	+	FUK	0.512691	1.62923
15	40331452	40340968	-	C15orf52	0.512691	1.62907
4	150581922	150584694	+	MAB21L2	0.827259	1.62894
11	4384897	4393697	-	TRIM21	0.512691	1.62853
8	144051266	144063833	-	OPLAH	0.827259	1.62834
7	33129244	33606069	+	BBS9	0.0495346	1.62698
11	44095549	44245430	+	EXT2	0.275234	1.62604
6	15246296	15522041	+	JARID2	0.275234	1.62578
9	134317098	134440586	+	RXRA	0.512691	1.62532
13	45393316	45418456	-	SLC25A30	0.275234	1.6249
1	42746335	42767085	-	P3H1	0.12663	1.62432
3	183178043	183428779	-	MCF2L2	0.827259	1.62418
9	127451486	127503502	+	LRSAM1	0.0495346	1.62362
21	17788967	17819387	-	C21orf91	0.512691	1.62348
7	152463786	152465550	+	LINC01003	0.275234	1.62301
2	207711540	207761840	+	CCNYL1	0.275234	1.62223
9	128720869	128724128	-	ZDHHC12	0.275234	1.62222
1	110211343	110283101	+	KCNC4	0.827259	1.62209
1	109062486	109076003	-	TAF13	0.512691	1.62202
X	54445454	54496167	-	FGD1	0.827259	1.62198
18	48539046	48863218	+	CTIF	0.12663	1.62184
12	51244558	51270891	-	SMAGP	0.512691	1.62163
9	96490241	96619831	-	CDC14B	0.12663	1.62102
2	27377231	27380791	-	ZNF513	0.512691	1.61894
18	61808063	61894248	-	RNF152	0.275234	1.61864
10	23439458	23442391	+	OTUD1	0.12663	1.61795
11	74330318	74398474	-	PGM2L1	0.12663	1.6172
6	79484991	79537459	-	LCA5	0.512691	1.61703
1	26787472	26798399	+	PIGV	0.0495346	1.61678
8	18056425	18084986	-	ASAH1	0.275234	1.61655
2	177612992	177618967	-	TTC30A	0.827259	1.61642
1	154697455	154870281	-	KCNN3	0.275234	1.61442
16	67175602	67184041	-	KIAA0895L	0.12663	1.6142
21	32393130	32393961	+	URB1-AS1	0.0495346	1.6139
4	1391552	1395990	+	CRIPAK	0.512691	1.61385
X	104099214	104157028	-	SLC25A53	0.512691	1.61348
6	160093082	160096213	+	RP11-288H12.3	0.275234	1.61334
20	45325288	45348425	-	SDC4	0.827259	1.61267
8	143246821	143262706	+	ZFP41	0.512691	1.61258
X	51803007	51902358	+	MAGED1	0.275234	1.61214
3	14489111	14542082	-	GRIP2	0.512691	1.61161
20	32690180	32690816	-	BAK1P1	0.275234	1.61106
11	9280654	9314781	-	TMEM41B	0.512691	1.61104
6	33420070	33457542	+	SYNGAP1	0.0495346	1.6105
X	150980509	150990776	+	HMGB3	0.827259	1.61045
19	4090321	4124130	-	MAP2K2	0.275234	1.60952
14	65410592	65744122	+	FUT8	0.275234	1.60923
19	39125770	39182817	+	PAK4	0.512691	1.60922
3	49857988	49870223	-	CAMKV	0.512691	1.60901
3	39107704	39138904	+	TTC21A	0.0495346	1.60896
4	165327623	165343161	+	MSMO1	0.827259	1.60809
11	34150988	34358009	-	ABTB2	0.275234	1.608
16	28477279	28495576	-	CLN3	0.827259	1.60746
19	40421592	40426026	-	SERTAD1	0.275234	1.60667
8	13083361	13604611	-	DLC1	0.512691	1.60662
22	50568861	50578466	-	CPT1B	0.512691	1.60521
8	38386207	38409528	+	LETM2	0.275234	1.6049
10	50624951	50641452	+	SGMS1-AS1	0.512691	1.60469
1	180154834	180204031	+	QSOX1	0.512691	1.60398
21	36156782	36294275	+	DOPEY2	0.275234	1.60381
6	79436908	79437168	-	DBIP1	0.827259	1.60367
13	113324164	113364149	-	GRTP1	0.275234	1.60325
10	19816239	20289857	+	PLXDC2	0.827259	1.60304
16	28974804	28990784	+	RP11-264B17.3	0.512691	1.60266
11	130069837	130144812	+	APLP2	0.512691	1.60257
19	18097793	18151693	+	MAST3	0.12663	1.60253
2	24825610	24826718	+	RP11-443B20.1	0.827259	1.60239
17	47891255	47895813	-	RP11-6N17.4	0.512691	1.60233
19	4343527	4360087	+	MPND	0.12663	1.60185
11	119206276	119308150	+	CBL	0.512691	1.60147
19	58404238	58408485	-	CTD-2619J13.14	0.512691	1.59907
17	75266228	75271228	-	MIF4GD	0.512691	1.59836
22	21697544	21735835	-	YPEL1	0.512691	1.59801
12	120302316	120313250	+	SIRT4	0.275234	1.59794
2	177548998	177553015	-	TTC30B	0.512691	1.59781
1	11736084	11754803	+	AGTRAP	0.512691	1.59778
16	1444934	1475581	-	CLCN7	0.512691	1.59758
14	68874143	68979441	-	ACTN1	0.275234	1.59686
6	26383096	26394875	+	BTN2A2	0.0495346	1.59599
7	64990809	65006744	-	ERV3-1	0.512691	1.59493
19	19561707	19618917	-	PBX4	0.512691	1.59464
9	72351425	72365236	-	ZFAND5	0.12663	1.59417
15	76258986	76261691	-	TYRO3P	0.0495346	1.59415
1	1324756	1328898	+	CPTP	0.275234	1.59334
X	154531391	154547573	-	G6PD	0.827259	1.59243
17	2303383	2325261	+	SRR	0.12663	1.59224
14	34541044	34541715	+	RP11-671J11.5	0.0495346	1.59194
19	18279760	18281623	-	JUND	0.275234	1.59141
19	52369917	52385796	+	ZNF880	0.275234	1.59065
6	25023247	25024484	-	ASS1P1	0.827259	1.58946
19	14477760	14496150	-	GIPC1	0.275234	1.589
10	100486642	100519865	-	SEC31B	0.0495346	1.58893
9	62897449	62900105	+	RP11-262H14.4	0.827259	1.58853
1	54225432	54413480	-	SSBP3	0.275234	1.58786
17	76470891	76501791	-	RHBDF2	0.0495346	1.5876
2	119223831	119265653	+	STEAP3	0.827259	1.58746
3	50155045	50189076	+	SEMA3F	0.12663	1.58736
19	58310449	58326934	-	LLNLR-245B6.1	0.512691	1.58703
17	42844600	42850708	+	AOC2	0.512691	1.58558
5	79236189	79327216	+	JMY	0.512691	1.58467
17	76376584	76387861	+	SPHK1	0.827259	1.58444
20	46557823	46684468	-	SLC13A3	0.827259	1.58427
7	151556111	151877126	-	PRKAG2	0.827259	1.58351
15	69160584	69272218	+	GLCE	0.512691	1.58348
X	153972327	153983196	+	TMEM187	0.512691	1.58342
9	125234853	125241331	-	HSPA5	0.827259	1.5827
X	154436913	154443468	+	GDI1	0.12663	1.58243
1	74705482	74733409	-	CRYZ	0.827259	1.58243
1	38708931	38710891	+	RP11-334L9.1	0.512691	1.58145
X	69616067	70039470	+	EDA	0.512691	1.58141
22	21642261	21644299	+	SDF2L1	0.275234	1.58138
16	68245304	68261063	+	PLA2G15	0.275234	1.58123
7	75899200	75986856	+	POR	0.275234	1.58093
16	3022620	3024287	-	HCFC1R1	0.12663	1.58054
17	81245000	81295548	-	SLC38A10	0.0495346	1.58028
3	51968510	51983410	-	ABHD14B	0.275234	1.58023
1	89633072	89769904	+	LRRC8C	0.512691	1.58016
10	110497838	110511545	+	DUSP5	0.275234	1.57962
14	23306835	23325370	+	BCL2L2-PABPN1	0.827259	1.57948
1	1917590	1919274	-	TMEM52	0.12663	1.57925
7	91264364	91271327	+	FZD1	0.275234	1.5786
19	1457670	1458581	-	CTB-25B13.12	0.0495346	1.57824
17	28335602	28347010	+	TNFAIP1	0.275234	1.57661
15	63121800	63142062	+	LACTB	0.12663	1.57652
20	32443059	32585075	-	NOL4L	0.512691	1.57635
2	88627539	88631822	+	AC062029.1	0.275234	1.57555
19	42485076	42485715	-	CTB-50E14.5	0.0495346	1.57474
5	122774996	122830109	+	SNX2	0.275234	1.57369
7	129225023	129430212	+	AHCYL2	0.512691	1.57354
9	135479079	135488894	+	PPP1R26	0.512691	1.57313
19	12833951	12874952	+	MAST1	0.0495346	1.57283
16	2911937	2951209	+	FLYWCH1	0.275234	1.57228
15	76336724	76342477	+	ISL2	0.512691	1.57162
19	18001132	18014103	+	ARRDC2	0.512691	1.57146
3	105366909	105576901	+	ALCAM	0.512691	1.57138
17	45620328	45655157	+	CRHR1-IT1	0.275234	1.57071
19	7680843	7687704	+	TRAPPC5	0.0495346	1.57053
20	33702754	33720320	-	PXMP4	0.512691	1.57029
16	83948282	83966333	+	OSGIN1	0.512691	1.57016
1	153804725	153922976	-	GATAD2B	0.827259	1.56966
X	136840931	136847798	-	RP11-1114A5.4	0.512691	1.56947
11	67350777	67356973	-	POLD4	0.12663	1.56874
15	45479611	45522808	-	SLC30A4	0.275234	1.56843
1	103525691	103555240	+	RNPC3	0.512691	1.56766
2	219279267	219286901	+	DNAJB2	0.512691	1.56741
9	137300482	137302252	-	NRARP	0.512691	1.56709
11	33076149	33079455	+	LINC00294	0.512691	1.56591
18	32124877	32470485	-	GAREM1	0.512691	1.56514
17	1934677	2025346	-	RTN4RL1	0.512691	1.56335
14	60144120	60169857	-	DHRS7	0.827259	1.56296
16	30650717	30656441	+	PRR14	0.275234	1.56293
6	35473597	35497077	-	TEAD3	0.512691	1.56263
15	48408306	48645850	-	FBN1	0.827259	1.56164
3	129087575	129161037	-	ISY1-RAB43	0.275234	1.56159
19	42268537	42295798	+	CIC	0.512691	1.56029
X	20149911	20267101	-	RPS6KA3	0.827259	1.56003
1	32365103	32394732	-	BSDC1	0.275234	1.56
16	2520357	2531423	+	AMDHD2	0.827259	1.55913
16	53991012	53994455	+	RP11-357N13.6	0.827259	1.5584
22	32801701	32863044	+	TIMP3	0.512691	1.55821
9	12972843	12973439	-	PRDX1P1	0.512691	1.55731
1	159918107	159925733	-	TAGLN2	0.827259	1.55626
6	31666102	31673547	+	XXbac-BPG32J3.22	0.512691	1.55621
15	84507885	84516815	-	GOLGA6L5P	0.275234	1.55535
10	87342736	87357883	+	LINC00863	0.12663	1.55507
16	84565594	84618078	-	COTL1	0.827259	1.55487
19	41956681	41959391	-	RABAC1	0.275234	1.55483
4	1347266	1388050	+	UVSSA	0.275234	1.55323
1	45002540	45011330	-	HECTD3	0.275234	1.55267
12	48337180	48351415	-	ZNF641	0.827259	1.55238
X	56729259	56818381	+	LINC01420	0.512691	1.55061
5	132481609	132490799	-	IRF1	0.827259	1.55049
1	155002630	155018523	+	ZBTB7B	0.827259	1.54997
16	84648525	84667687	+	KLHL36	0.275234	1.54988
2	231732425	231786273	-	PDE6D	0.12663	1.54974
12	121626550	121642678	+	ORAI1	0.275234	1.54926
X	154778684	154821008	-	MPP1	0.275234	1.5491
3	194686544	194689038	+	FAM43A	0.275234	1.54896
17	80260866	80398787	+	RNF213	0.0495346	1.54844
2	84905625	84906676	+	TMSB10	0.275234	1.54844
19	7534004	7561765	+	PNPLA6	0.275234	1.54777
11	61680433	61747002	+	DAGLA	0.512691	1.5477
17	65528563	65561648	-	AXIN2	0.827259	1.54759
5	70094659	70128435	-	RP11-1319K7.1	0.275234	1.54688
22	29073078	29168334	+	KREMEN1	0.512691	1.54664
16	29900375	29919865	+	ASPHD1	0.0495346	1.5464
13	99606669	99897135	+	CLYBL	0.512691	1.54635
16	56466836	56520284	-	BBS2	0.12663	1.54615
2	74120680	74123219	+	FNBP1P1	0.512691	1.54576
9	37438114	37465400	-	ZBTB5	0.275234	1.5448
22	19969896	20016809	-	ARVCF	0.0495346	1.54429
18	68715209	69055190	+	CCDC102B	0.512691	1.54355
2	74421678	74425756	+	WDR54	0.275234	1.54301
14	74476192	74494178	-	NPC2	0.275234	1.54276
7	86876906	87059700	-	KIAA1324L	0.12663	1.54194
13	95648733	95676926	-	DNAJC3-AS1	0.827259	1.5417
8	144314584	144326911	-	DGAT1	0.12663	1.5414
19	896503	913246	-	R3HDM4	0.12663	1.54107
9	127907886	127917039	-	ST6GALNAC4	0.512691	1.54088
14	73931501	73950415	-	FAM161B	0.12663	1.54085
17	4967992	4987653	-	CAMTA2	0.275234	1.54026
9	124517275	124771311	-	NR6A1	0.275234	1.54022
7	5823160	5854436	+	ZNF815P	0.12663	1.53976
6	53794497	53924122	+	LRRC1	0.275234	1.53905
11	66744451	66843329	+	C11orf80	0.275234	1.53868
1	114535995	114537841	+	PKMP1	0.0495346	1.53853
2	219209768	219218991	-	ABCB6	0.512691	1.53791
4	70704204	70807316	+	RUFY3	0.512691	1.53772
19	44664131	44666159	+	AC092066.1	0.275234	1.5373
3	128479427	128493186	-	GATA2	0.827259	1.53729
20	45833810	45843276	+	SNX21	0.512691	1.53624
19	11164267	11197792	-	KANK2	0.827259	1.53596
14	100291111	100306548	-	SLC25A29	0.275234	1.5353
2	25926596	25982750	-	KIF3C	0.512691	1.53524
6	2987987	3028870	+	NQO2	0.512691	1.53445
22	19783224	19854940	-	GNB1L	0.0495346	1.53444
12	93377883	93408147	+	NUDT4	0.0495346	1.53326
10	121478334	121598459	-	FGFR2	0.512691	1.53316
5	43289395	43313513	-	HMGCS1	0.827259	1.53261
10	68827541	68895433	+	STOX1	0.512691	1.53246
6	56955126	57027343	+	BEND6	0.275234	1.53234
8	75376709	75377015	+	PKMP4	0.0495346	1.53226
9	137605654	137615361	+	ARRDC1	0.827259	1.53224
17	80101556	80119880	+	GAA	0.275234	1.53223
1	232804892	232808408	+	MAP10	0.512691	1.53189
1	45511036	45523048	-	PRDX1	0.512691	1.53183
2	85342088	85354621	-	RETSAT	0.275234	1.53179
1	156193932	156212797	+	SLC25A44	0.12663	1.53167
12	27037100	27038961	+	RP11-582E3.6	0.512691	1.53135
17	60126535	60135645	-	CTD-2319I12.4	0.512691	1.52983
1	205767986	205775461	-	RAB29	0.0495346	1.52845
20	31944342	31952093	-	PDRG1	0.275234	1.52789
1	32741885	32774971	+	KIAA1522	0.0495346	1.52762
11	47407132	47416502	+	SLC39A13	0.12663	1.52725
22	42058354	42070843	-	NAGA	0.512691	1.5271
12	123575891	123585116	-	RP11-486O12.2	0.275234	1.52689
8	17643795	17800918	-	MTUS1	0.512691	1.5263
13	66302834	67230446	-	PCDH9	0.275234	1.52606
6	31740020	31764852	+	MSH5-SAPCD1	0.827259	1.52588
X	68828997	68842148	+	EFNB1	0.275234	1.52574
3	50226292	50259356	+	GNAI2	0.275234	1.52566
14	76762189	76783016	+	VASH1	0.0495346	1.52557
12	57755098	57760408	+	MARCH9	0.275234	1.5255
20	35626031	35664957	-	CPNE1	0.275234	1.52486
19	40191744	40215576	+	MAP3K10	0.0495346	1.52455
7	66739829	66740386	-	RP11-792A8.4	0.0495346	1.52426
11	60924463	60937160	+	TMEM132A	0.275234	1.52328
11	113797874	113875571	-	USP28	0.827259	1.52298
12	25959029	26079893	+	RASSF8	0.275234	1.52295
12	95076749	95217483	-	FGD6	0.275234	1.52248
2	186590065	186680902	+	ITGAV	0.275234	1.52236
10	69269984	69401883	+	HK1	0.0495346	1.52156
X	109624244	109733404	-	ACSL4	0.512691	1.52092
17	75032575	75065890	+	KCTD2	0.512691	1.51959
8	102239394	102253334	+	UBR5-AS1	0.512691	1.51864
22	24583750	24629006	+	GGT1	0.827259	1.5184
3	9808086	9855139	+	TTLL3	0.827259	1.51832
17	42188799	42194533	-	GHDC	0.275234	1.51771
15	74541177	74598132	+	ARID3B	0.512691	1.51687
13	113297241	113323673	+	LAMP1	0.512691	1.51681
16	84476421	84554034	-	TLDC1	0.275234	1.51679
17	45263121	45317041	-	MAP3K14	0.512691	1.51653
1	93262186	93346026	-	CCDC18-AS1	0.12663	1.51616
16	2513870	2520219	+	ATP6V0C	0.827259	1.51581
1	153606886	153613146	-	S100A16	0.275234	1.5155
22	30291990	30327047	-	TBC1D10A	0.275234	1.51523
9	62374128	62376837	-	RP11-111F5.4	0.827259	1.51318
19	11089362	11133817	+	LDLR	0.827259	1.51317
3	135965673	136147892	+	PPP2R3A	0.512691	1.51246
10	102245532	102382900	+	GBF1	0.275234	1.51199
12	49791146	49828751	-	NCKAP5L	0.275234	1.51184
11	74493366	74498534	+	AP001372.2	0.275234	1.51098
X	149482543	149533936	-	AF011889.5	0.275234	1.51021
1	87328468	87348924	+	LMO4	0.0495346	1.50961
8	23385783	23457696	-	ENTPD4	0.512691	1.50942
X	150766337	150898817	-	CD99L2	0.275234	1.50934
1	46557408	46616844	-	MKNK1	0.0495346	1.50933
14	103519659	103523112	-	CKB	0.275234	1.50924
5	106415576	106417242	-	CTC-278L1.1	0.827259	1.50902
10	28522652	28532744	-	WAC-AS1	0.0495346	1.50889
17	56978105	57006769	+	SCPEP1	0.0495346	1.5079
20	49237946	49278427	-	ZNFX1	0.0495346	1.50776
5	107724961	107727118	+	RP11-252I13.1	0.512691	1.50697
17	78378640	78425115	+	PGS1	0.512691	1.50635
16	74447427	74607145	-	GLG1	0.512691	1.50491
18	62325287	62391293	+	TNFRSF11A	0.827259	1.50409
7	26152240	26187126	+	NFE2L3	0.512691	1.50384
18	67506582	67516981	-	DSEL	0.275234	1.50345
19	11374685	11376952	+	SWSAP1	0.827259	1.50213
11	5663557	5938620	-	TRIM5	0.512691	1.50193
9	2621834	2660054	+	VLDLR	0.275234	1.50073
15	40039311	40067291	+	SRP14-AS1	0.275234	1.50035
6	79914812	79947581	-	ELOVL4	0.512691	1.49962
9	127731524	127735318	-	TOR2A	0.275234	1.49942
12	56237807	56258392	-	ANKRD52	0.827259	1.49909
15	55340032	55408511	-	CCPG1	0.275234	1.4989
6	30727709	30742734	-	FLOT1	0.275234	1.49879
3	149129584	149173733	+	HPS3	0.512691	1.4986
19	18153158	18178118	+	AC007192.4	0.512691	1.49826
11	67991104	68004983	-	UNC93B1	0.512691	1.49791
9	129007036	129028304	-	SH3GLB2	0.512691	1.4976
22	38111495	38205691	-	PLA2G6	0.0495346	1.49707
22	46576012	46679791	+	GRAMD4	0.512691	1.4959
2	226731317	226799760	-	IRS1	0.12663	1.4958
X	118495898	118686164	+	DOCK11	0.827259	1.49576
7	44999475	45076470	+	CCM2	0.827259	1.49549
12	6976186	7018511	-	LPCAT3	0.827259	1.49493
21	8437629	8438552	-	CH507-513H4.3	0.827259	1.49492
7	74082933	74122526	+	LIMK1	0.275234	1.49486
12	57762334	57768987	-	CYP27B1	0.275234	1.49412
X	48973720	49002265	-	GRIPAP1	0.275234	1.49409
1	179293714	179358681	+	SOAT1	0.827259	1.49249
9	7796490	7888381	-	TMEM261	0.512691	1.49227
1	185157080	185291766	+	SWT1	0.275234	1.49222
16	71447597	71463096	-	ZNF23	0.512691	1.49203
7	116672390	116798387	+	MET	0.512691	1.49062
17	50722074	50724225	+	RP11-294J22.7	0.827259	1.4902
22	37608475	37633565	+	GGA1	0.275234	1.49017
15	52307283	52529051	-	MYO5A	0.12663	1.48941
5	177592158	177596125	+	TMED9	0.827259	1.48929
1	54849633	54887219	-	DHCR24	0.512691	1.48905
1	203305491	203309603	+	BTG2	0.512691	1.489
17	8224821	8248045	-	CTC1	0.512691	1.48861
7	78017057	79453575	-	MAGI2	0.0495346	1.48836
12	14803572	14906587	+	C12orf60	0.512691	1.48789
19	18588685	18592337	+	C19orf60	0.512691	1.4877
17	64039142	64130820	-	ERN1	0.512691	1.48769
X	23075758	23076768	+	FAM3C2	0.512691	1.48706
1	911435	914949	+	RP11-54O7.1	0.512691	1.48675
16	85690084	85751130	-	C16orf74	0.275234	1.4865
9	35490127	35561899	+	RUSC2	0.827259	1.48605
15	60347134	60402884	-	ANXA2	0.512691	1.48601
9	34610486	34612105	-	RPP25L	0.827259	1.48559
1	109668022	109709552	+	GSTM2	0.0495346	1.48529
1	169105697	169132723	+	ATP1B1	0.512691	1.48523
2	105357712	105438514	-	FHL2	0.512691	1.48509
18	76358190	76495191	-	ZNF516	0.512691	1.48503
17	47450568	47492493	-	CTD-2026D20.3	0.827259	1.48486
11	117314557	117413269	+	CEP164	0.512691	1.48484
1	32361270	32364279	-	FAM229A	0.512691	1.48466
7	18086949	19002417	+	HDAC9	0.512691	1.48443
12	53046969	53064373	+	TNS2	0.512691	1.48414
19	1461143	1479557	-	C19orf25	0.512691	1.48402
5	74640023	74722648	+	HEXB	0.275234	1.48392
9	33624274	33625294	+	ANXA2P2	0.512691	1.48389
4	2462220	2625321	+	RNF4	0.512691	1.48377
7	100673531	100679175	+	GNB2	0.827259	1.48344
14	34706769	34714824	-	CFL2	0.12663	1.48328
20	2840703	2866733	+	VPS16	0.275234	1.48314
4	849276	932374	-	GAK	0.827259	1.48243
15	73683966	73714519	+	CD276	0.275234	1.48242
6	27357825	27360222	-	ZNF204P	0.12663	1.48187
1	247895587	247896532	+	OR2W3	0.512691	1.48089
2	201700554	201781190	-	ALS2	0.12663	1.48028
9	132878027	132890202	+	C9orf9	0.275234	1.47986
19	37106734	37172742	-	ZNF585A	0.827259	1.47898
4	86935002	87141055	+	AFF1	0.275234	1.47892
22	17084954	17115695	+	IL17RA	0.512691	1.47881
6	84033756	84090882	+	MRAP2	0.827259	1.47869
6	36871870	36928965	+	C6orf89	0.12663	1.47836
3	48241100	48299254	+	ZNF589	0.827259	1.47799
1	27234516	27308634	+	WDTC1	0.275234	1.4775
1	108875350	108934546	+	GPSM2	0.827259	1.47683
7	2631951	2664803	+	TTYH3	0.512691	1.47664
13	45341345	45393414	+	TPT1-AS1	0.275234	1.47662
7	129055223	129057240	+	TPI1P2	0.12663	1.47611
14	50329404	50416462	-	CDKL1	0.827259	1.47589
1	85018082	85048500	-	MCOLN3	0.0495346	1.47582
12	13044284	13142522	+	FAM234B	0.827259	1.47581
17	63009556	63427700	+	TANC2	0.275234	1.47568
10	20779973	21174188	-	NEBL	0.512691	1.47541
17	58083415	58095537	+	DYNLL2	0.275234	1.47512
17	50346092	50363139	+	XYLT2	0.512691	1.4749
10	97498868	97571210	+	UBTD1	0.12663	1.47482
10	3066333	3137713	+	PFKP	0.275234	1.47451
11	118998142	119015792	+	CCDC84	0.275234	1.47398
2	85544723	85561548	-	GGCX	0.12663	1.47394
7	127652180	128092610	+	SND1	0.12663	1.4735
1	11934205	11975539	+	PLOD1	0.275234	1.47321
3	195863364	195911946	-	TNK2	0.275234	1.47311
17	7705202	7711379	+	EFNB3	0.275234	1.4727
12	51951667	51997079	+	ACVR1B	0.827259	1.47243
X	41085635	41236580	+	USP9X	0.275234	1.47225
19	17323223	17334830	-	ANO8	0.827259	1.47176
17	39252644	39402524	-	FBXL20	0.827259	1.47158
17	78971238	78980110	-	LGALS3BP	0.827259	1.47152
17	7281667	7288258	+	SLC2A4	0.275234	1.4715
17	28755978	28855233	-	FAM222B	0.512691	1.47042
12	122834453	122862961	+	HIP1R	0.0495346	1.46946
19	3094410	3124005	+	GNA11	0.827259	1.46909
17	17843511	17972423	-	TOM1L2	0.12663	1.46821
10	49455368	49539539	-	ERCC6	0.12663	1.4682
17	799313	979771	-	NXN	0.827259	1.46806
6	16129125	16148249	+	MYLIP	0.512691	1.46778
12	57088894	57095477	+	NAB2	0.12663	1.467
19	2037465	2051245	-	MKNK2	0.512691	1.46643
9	96450201	96491337	+	HABP4	0.0495346	1.4664
19	34956354	34964050	-	ZNF792	0.275234	1.46565
5	441498	443161	-	EXOC3-AS1	0.512691	1.46517
5	61332273	61546171	+	ZSWIM6	0.275234	1.46497
2	26034107	26137455	+	RAB10	0.12663	1.46462
5	95751319	95823006	-	GLRX	0.512691	1.46454
1	211743457	211830773	-	LPGAT1	0.827259	1.46424
16	89818179	89871320	+	SPIRE2	0.827259	1.46419
2	69897688	69942946	+	MXD1	0.512691	1.4639
16	30757423	30762711	-	CCDC189	0.827259	1.4633
1	204828651	205022823	+	NFASC	0.512691	1.46291
2	72175984	72826042	-	EXOC6B	0.0495346	1.46215
1	235661041	235883641	-	LYST	0.0495346	1.46208
11	6390431	6394999	+	SMPD1	0.0495346	1.4615
6	17759183	17987624	-	KIF13A	0.512691	1.46125
15	63042632	63071916	+	TPM1	0.512691	1.46066
3	8980591	9363054	-	SRGAP3	0.275234	1.46004
3	72371825	72446919	-	RYBP	0.275234	1.46
11	96389989	96507575	+	JRKL	0.512691	1.45946
1	9729026	9824527	-	CLSTN1	0.275234	1.45919
2	219434846	219498288	+	SPEG	0.512691	1.45903
22	20129456	20148008	+	ZDHHC8	0.275234	1.45894
12	122920951	122981650	-	ABCB9	0.512691	1.45848
16	4314761	4339598	+	GLIS2	0.0495346	1.45843
17	79833156	79839430	-	CBX4	0.512691	1.45842
4	109709989	109730078	-	PLA2G12A	0.275234	1.45839
7	66526088	66542625	-	GS1-124K5.11	0.12663	1.4583
10	73785582	73801798	+	ZSWIM8	0.827259	1.45779
17	19215615	19336716	+	EPN2	0.275234	1.45745
16	71464555	71565090	-	ZNF19	0.512691	1.45731
12	113358566	113391626	+	PLBD2	0.512691	1.45726
X	106813871	107000245	-	MORC4	0.827259	1.45719
X	149476990	149521097	-	IDS	0.512691	1.45716
7	100352176	100367734	+	PILRB	0.827259	1.45687
3	179794958	180037054	-	PEX5L	0.512691	1.45683
7	44748581	44769882	+	ZMIZ2	0.512691	1.45645
9	133351755	133356677	-	SURF1	0.275234	1.45637
5	70219918	70258931	-	RP11-1415C14.3	0.827259	1.45624
1	45550543	45570050	+	AKR1A1	0.275234	1.45599
19	10289981	10296779	+	ICAM5	0.275234	1.45489
5	132875379	132963635	-	AFF4	0.512691	1.45379
5	172042073	172188387	-	STK10	0.512691	1.4536
3	186046308	186110319	-	ETV5	0.275234	1.45357
1	155234452	155244700	-	GBA	0.512691	1.45336
14	88465778	88554734	-	PTPN21	0.512691	1.45266
2	74458329	74460892	+	WBP1	0.12663	1.45259
1	155897808	155911405	-	RIT1	0.512691	1.45228
12	64713445	64759448	-	GNS	0.512691	1.45219
14	73275107	73463643	-	NUMB	0.512691	1.45168
1	54756898	54764515	-	PARS2	0.12663	1.45152
5	176392455	176416570	-	CLTB	0.827259	1.45138
14	52775194	52791669	-	GNPNAT1	0.827259	1.45108
17	64854312	64919481	-	LRRC37A3	0.827259	1.45101
16	28904421	28936527	-	RABEP2	0.512691	1.45056
9	89360787	89498131	-	SEMA4D	0.512691	1.45031
7	129126518	129130794	+	RP11-286H14.4	0.512691	1.44991
14	95181940	95319907	-	CLMN	0.275234	1.44963
7	72969696	73005923	-	STAG3L3	0.275234	1.44888
11	842808	867117	+	TSPAN4	0.512691	1.44888
22	42796502	42858107	-	ARFGAP3	0.275234	1.44864
16	30444381	30446182	-	SEPHS2	0.512691	1.44821
4	55346109	55373097	+	SRD5A3	0.827259	1.44814
10	71816298	71851376	-	PSAP	0.0495346	1.44734
15	80152490	80186947	+	FAH	0.512691	1.44721
3	52228610	52239261	-	TWF2	0.275234	1.44654
12	116738178	116853632	+	RNFT2	0.275234	1.44618
9	123109500	123268577	-	STRBP	0.12663	1.44614
6	44258166	44265789	-	NFKBIE	0.512691	1.44614
13	93226842	94407402	+	GPC6	0.275234	1.446
1	202961869	202967281	-	CYB5R1	0.0495346	1.44576
2	88027205	88055730	-	KRCC1	0.827259	1.44559
1	12019466	12032046	+	MIIP	0.827259	1.44486
3	119294373	119420715	+	ARHGAP31	0.512691	1.44475
19	45714387	45717382	-	AC007191.4	0.827259	1.44449
14	32074946	32076794	-	ARHGAP5-AS1	0.827259	1.44444
17	28394756	28407198	-	SLC46A1	0.827259	1.44316
18	57639455	57738045	+	RP11-35G9.5	0.827259	1.44268
5	56815574	56896153	+	MAP3K1	0.275234	1.44184
13	20699307	20703719	-	RP11-172H24.4	0.827259	1.44184
19	53235381	53254899	-	ZNF677	0.512691	1.44172
11	94706431	94876754	+	AMOTL1	0.827259	1.44099
3	9649433	9702395	+	MTMR14	0.275234	1.44067
8	144373101	144393243	+	ADCK5	0.512691	1.44067
4	122732702	122744944	+	BBS12	0.275234	1.44044
6	31959080	31969756	+	SKIV2L	0.827259	1.4396
22	37010859	37020184	-	TST	0.275234	1.43953
22	45190338	45240770	-	KIAA0930	0.827259	1.43934
5	178130996	178150566	+	RMND5B	0.275234	1.43915
5	179797597	179806953	-	MGAT4B	0.827259	1.43892
X	48922028	48958387	-	OTUD5	0.512691	1.43854
1	182573634	182589257	-	RNASEL	0.275234	1.438
15	78507564	78537373	+	HYKK	0.275234	1.43798
5	78000525	78294756	-	AP3B1	0.512691	1.43766
16	2737076	2752601	-	SRRM2-AS1	0.827259	1.43704
19	647526	663278	-	RNF126	0.512691	1.43699
5	73552335	73565687	-	ANKRA2	0.275234	1.43669
19	52764195	52818005	-	ZNF600	0.827259	1.43617
7	100107070	100119842	-	TAF6	0.827259	1.43487
2	178463664	178478601	-	FKBP7	0.512691	1.43478
5	142108505	142154444	+	NDFIP1	0.512691	1.43359
1	53946077	53968169	+	LRRC42	0.12663	1.43353
19	9751993	9793181	-	ZNF846	0.0495346	1.43352
12	55980432	55981036	-	RP11-603J24.7	0.275234	1.43352
22	42617840	42649569	-	CYB5R3	0.12663	1.43216
1	245749342	246507313	-	SMYD3	0.275234	1.43193
12	54121277	54189009	-	SMUG1	0.0495346	1.43082
8	74321130	74488873	+	GDAP1	0.275234	1.43074
11	64894546	64917249	-	ATG2A	0.512691	1.42986
2	85751344	85788067	+	ATOH8	0.512691	1.42985
1	211658657	211675631	-	NEK2	0.512691	1.42969
4	38664196	38701043	+	KLF3	0.275234	1.42962
3	49171611	49176487	+	KLHDC8B	0.0495346	1.42936
1	10210805	10381604	+	KIF1B	0.827259	1.42873
17	439978	445940	-	FAM101B	0.512691	1.42859
1	222872271	223005996	+	DISP1	0.275234	1.42808
11	130866254	130870248	-	RP11-890B15.3	0.512691	1.42784
17	32266176	32324662	+	RHBDL3	0.512691	1.42697
5	176647387	176659055	+	TSPAN17	0.827259	1.42695
4	182143987	182803025	+	TENM3	0.827259	1.42603
20	63736283	63739104	+	LIME1	0.512691	1.42595
7	121440834	121441262	-	RP11-3L10.3	0.512691	1.42565
1	183023460	183145593	+	LAMC1	0.512691	1.42563
12	110719680	110742940	-	PPP1CC	0.512691	1.42549
12	25204789	25250937	-	KRAS	0.512691	1.42536
14	67294371	67360266	-	ATP6V1D	0.827259	1.42523
15	40439721	40468243	+	BAHD1	0.827259	1.42516
6	41770176	41786543	-	FRS3	0.12663	1.42507
12	53064316	53079421	-	SPRYD3	0.827259	1.42458
1	156728442	156736961	+	RRNAD1	0.0495346	1.42407
9	127785679	127790788	+	CDK9	0.12663	1.42395
2	234951973	235055715	+	SH3BP4	0.512691	1.42377
11	59713456	59805883	+	STX3	0.275234	1.42328
1	112396181	112463457	+	CTTNBP2NL	0.275234	1.42303
19	16661127	16690030	+	TMEM38A	0.275234	1.42275
17	18511221	18551706	-	CTD-2303H24.2	0.512691	1.42259
8	143833594	143840975	-	NRBP2	0.512691	1.42245
1	153981617	153986359	-	RAB13	0.275234	1.42175
19	3506273	3538331	+	FZR1	0.827259	1.42141
5	102753981	103031106	+	PAM	0.275234	1.42082
14	71320449	71741230	+	SIPA1L1	0.512691	1.42031
17	29255836	29294119	-	NUFIP2	0.512691	1.41997
3	69739435	69968338	+	MITF	0.827259	1.41947
10	60026298	60733491	-	ANK3	0.827259	1.41941
17	45148502	45152102	+	HEXIM1	0.0495346	1.41878
14	49577392	49577795	-	RPL32P29	0.275234	1.41837
11	6612763	6619462	-	TPP1	0.512691	1.41831
9	136791355	136793258	+	TMEM141	0.512691	1.4183
19	39498895	39508482	+	DLL3	0.0495346	1.41806
10	116671192	116742575	-	HSPA12A	0.512691	1.41793
18	12438890	12448206	+	RP11-861E21.2	0.827259	1.41778
20	48624252	48827884	-	PREX1	0.275234	1.41733
14	67619798	67651721	+	ARG2	0.827259	1.41733
15	82355142	82420076	+	UBE2Q2P2	0.827259	1.41721
8	11842524	11869449	-	CTSB	0.512691	1.41662
17	16786489	16804456	+	USP32P1	0.512691	1.41636
15	74179466	74212268	-	STRA6	0.512691	1.41585
10	97319267	97321916	+	FRAT1	0.12663	1.41545
11	64269830	64284705	-	BAD	0.512691	1.41476
10	84328586	84518522	+	CCSER2	0.275234	1.41466
1	182381704	182392207	-	GLUL	0.512691	1.41459
6	70667776	70862016	+	SMAP1	0.512691	1.41454
11	61959718	61967661	-	FTH1	0.827259	1.41437
11	6497260	6593759	+	DNHD1	0.275234	1.41421
16	70687439	70801162	-	VAC14	0.827259	1.41384
2	117833937	117841659	+	AC009404.2	0.827259	1.41343
11	67791648	67805337	-	FAM86C2P	0.275234	1.41338
6	36493892	36547471	-	STK38	0.0495346	1.41301
3	190514051	190659751	+	IL1RAP	0.275234	1.41225
11	17208153	17349975	+	NUCB2	0.275234	1.4121
X	70133449	70166325	+	IGBP1	0.275234	1.41192
8	100157906	100259279	+	SPAG1	0.512691	1.41175
16	74999030	75110995	+	ZNRF1	0.827259	1.4117
7	100336079	100351901	+	STAG3L5P	0.827259	1.41094
22	41688939	41698137	+	C22orf46	0.12663	1.41083
5	93267429	93268426	+	POLD2P1	0.827259	1.41065
14	20457719	20461613	-	TMEM55B	0.512691	1.41036
17	43398959	43401138	+	ARL4D	0.512691	1.41014
17	6853861	6954108	+	ALOX12P2	0.827259	1.40941
1	207034366	207081025	+	PFKFB2	0.827259	1.40922
1	236686454	236764632	+	ACTN2	0.512691	1.40871
12	56118159	56127515	+	ZC3H10	0.275234	1.40837
12	54455950	54473603	-	GTSF1	0.827259	1.40831
1	119619422	119647774	-	ZNF697	0.512691	1.40816
12	68746106	68793965	+	SLC35E3	0.512691	1.40811
5	132692628	132737639	-	KIF3A	0.275234	1.40701
22	19179473	19291717	-	CLTCL1	0.512691	1.40663
7	129830732	129952950	-	UBE2H	0.12663	1.40654
1	221701424	221742177	-	DUSP10	0.275234	1.40651
22	50502949	50507692	-	LMF2	0.827259	1.40643
1	24356999	24416935	-	STPG1	0.827259	1.40604
14	59429022	59465343	-	GPR135	0.827259	1.40603
12	40692442	41072419	+	CNTN1	0.827259	1.40576
6	14117256	14136919	+	CD83	0.275234	1.40515
3	160256986	160399881	-	IFT80	0.0495346	1.40495
12	120725735	120740009	+	ACADS	0.512691	1.40456
22	39349925	39385589	+	SYNGR1	0.275234	1.40444
4	145618263	145660036	+	MMAA	0.827259	1.40433
15	70853239	71053658	+	LRRC49	0.0495346	1.40427
9	114334156	114394406	-	AKNA	0.275234	1.40413
5	137937960	138051962	-	FAM13B	0.512691	1.40411
11	72685069	72793600	-	ARAP1	0.512691	1.40405
4	41256413	41268456	+	UCHL1	0.827259	1.40383
11	8391868	8594290	-	STK33	0.512691	1.40356
5	141350102	141512980	+	PCDHGB1	0.512691	1.40321
17	57861243	57955324	-	CUEDC1	0.512691	1.40268
6	13924446	13980303	+	RNF182	0.275234	1.40263
8	37784191	37844897	+	ADGRA2	0.275234	1.4024
4	42408373	42657106	-	ATP8A1	0.827259	1.40236
1	21822245	21937298	-	HSPG2	0.827259	1.4022
10	109996368	110135566	+	ADD3	0.275234	1.40217
19	45349837	45370919	-	ERCC2	0.275234	1.40189
8	144291591	144314723	+	HSF1	0.827259	1.40189
X	100855288	100856380	-	HNRNPA1P26	0.275234	1.40183
11	1274371	1309655	-	TOLLIP	0.512691	1.40177
4	121667955	121697114	-	ANXA5	0.275234	1.40093
22	49918167	49927541	+	CRELD2	0.827259	1.40087
21	45073853	45226561	+	ADARB1	0.512691	1.4006
20	36045622	36050961	-	LINC00657	0.275234	1.40056
7	102433106	102456822	+	ORAI2	0.512691	1.40039
14	77024543	77028700	-	IRF2BPL	0.827259	1.40037
7	100169606	100177373	-	GPC2	0.275234	1.39966
7	2728112	2844325	-	GNA12	0.512691	1.39928
5	151212150	151270441	+	GM2A	0.275234	1.39921
2	48440598	48515392	+	PPP1R21	0.275234	1.39911
7	150368790	150410598	+	ZNF775	0.0495346	1.39904
8	23528805	23575464	+	SLC25A37	0.512691	1.39833
4	98470367	98658630	-	TSPAN5	0.512691	1.39807
10	93667883	93702573	-	FRA10AC1	0.827259	1.39793
7	152134922	152436006	-	KMT2C	0.0495346	1.39773
9	120600813	120714471	-	MEGF9	0.275234	1.39758
17	6643315	6651635	-	MED31	0.827259	1.39758
7	23597379	23644709	+	CCDC126	0.12663	1.39719
13	52600119	52637447	+	MRPS31P4	0.512691	1.39706
15	43330674	43354556	+	ADAL	0.512691	1.3968
6	30066709	30070334	+	PPP1R11	0.827259	1.39657
[truncated: 10,902 more rows]

## Sheet: Supplementary Table 10
Supplementary Table 10. Ingenuity pathway analysis of differentially expressed genes.
Ingenuity Canonical Pathways	p value	z-score	Downregulated	No change	Upregulated	No overlap with dataset	Molecules
Rac Signaling	0.000154882	2.449	0/117 (0%)	0/117 (0%)	6/117 (5%)	111/117 (95%)	ITGA3,JUN,RRAS,FGFR4,PIK3CD,NFKB2
Agrin Interactions at Neuromuscular Junction	0.000109648	2.236	0/69 (0%)	0/69 (0%)	5/69 (7%)	64/69 (93%)	ITGA3,JUN,RRAS,ERBB3,AGRN
Estrogen-Dependent Breast Cancer Signaling	0.000186209	2.236	0/77 (0%)	0/77 (0%)	5/77 (6%)	72/77 (94%)	JUN,RRAS,FGFR4,PIK3CD,NFKB2
JAK/Stat Signaling	0.000263027	2.236	0/83 (0%)	0/83 (0%)	5/83 (6%)	78/83 (94%)	JUN,RRAS,FGFR4,PIK3CD,NFKB2
LPS-stimulated MAPK Signaling	0.000331131	2.236	0/87 (0%)	0/87 (0%)	5/87 (6%)	82/87 (94%)	JUN,RRAS,FGFR4,PIK3CD,NFKB2
NF-κB Activation by Viruses	0.000331131	2.236	0/87 (0%)	0/87 (0%)	5/87 (6%)	82/87 (94%)	ITGA3,RRAS,FGFR4,PIK3CD,NFKB2
RANK Signaling in Osteoclasts	0.000676083	2.236	0/102 (0%)	0/102 (0%)	5/102 (5%)	97/102 (95%)	JUN,FGFR4,PIK3CD,NFKB2,GSN
HGF Signaling	0.0011749	2.236	0/115 (0%)	0/115 (0%)	5/115 (4%)	110/115 (96%)	ITGA3,JUN,RRAS,FGFR4,PIK3CD
Renin-Angiotensin Signaling	0.00151356	2.236	0/122 (0%)	0/122 (0%)	5/122 (4%)	117/122 (96%)	JUN,RRAS,FGFR4,PIK3CD,NFKB2
IL-6 Signaling	0.00186209	2.236	0/128 (0%)	0/128 (0%)	5/128 (4%)	123/128 (96%)	JUN,RRAS,FGFR4,PIK3CD,NFKB2
Gα12/13 Signaling	0.0020893	2.236	0/131 (0%)	0/131 (0%)	5/131 (4%)	126/131 (96%)	JUN,RRAS,FGFR4,PIK3CD,NFKB2
HMGB1 Signaling	0.00223872	2.236	0/133 (0%)	0/133 (0%)	5/133 (4%)	128/133 (96%)	JUN,RRAS,FGFR4,PIK3CD,NFKB2
PKCθ Signaling in T Lymphocytes	0.00223872	2.236	0/133 (0%)	0/133 (0%)	5/133 (4%)	128/133 (96%)	JUN,RRAS,FGFR4,PIK3CD,NFKB2
P2Y Purigenic Receptor Signaling Pathway	0.00223872	2.236	0/133 (0%)	0/133 (0%)	5/133 (4%)	128/133 (96%)	JUN,RRAS,FGFR4,PIK3CD,NFKB2
Integrin Signaling	0.00398107	2.236	0/219 (0%)	0/219 (0%)	6/219 (3%)	213/219 (97%)	ITGA3,RRAS,FGFR4,PIK3CD,GSN,ITGA7
Colorectal Cancer Metastasis Signaling	0.00724436	2.236	0/248 (0%)	0/248 (0%)	6/248 (2%)	242/248 (98%)	JUN,RRAS,FGFR4,PIK3CD,NFKB2,LRP1
NF-κB Signaling	0.00812831	2.236	0/181 (0%)	0/181 (0%)	5/181 (3%)	176/181 (97%)	RRAS,FGFR4,PIK3CD,NFKB2,DDR1
B Cell Receptor Signaling	0.01	2.236	0/190 (0%)	0/190 (0%)	5/190 (3%)	185/190 (97%)	JUN,RRAS,FGFR4,PIK3CD,NFKB2
Signaling by Rho Family GTPases	0.0281838	2.236	0/248 (0%)	0/248 (0%)	5/248 (2%)	243/248 (98%)	ITGA3,JUN,FGFR4,PIK3CD,NFKB2
ErbB2-ErbB3 Signaling	0.000109648	2	0/69 (0%)	0/69 (0%)	5/69 (7%)	64/69 (93%)	JUN,RRAS,FGFR4,ERBB3,PIK3CD
Thrombopoietin Signaling	0.00102329	2	0/65 (0%)	0/65 (0%)	4/65 (6%)	61/65 (94%)	JUN,RRAS,FGFR4,PIK3CD
Paxillin Signaling	0.00107152	2	0/113 (0%)	0/113 (0%)	5/113 (4%)	108/113 (96%)	ITGA3,RRAS,FGFR4,PIK3CD,ITGA7
GDNF Family Ligand-Receptor Interactions	0.0018197	2	0/76 (0%)	0/76 (0%)	4/76 (5%)	72/76 (95%)	JUN,RRAS,FGFR4,PIK3CD
Neurotrophin/TRK Signaling	0.0018197	2	0/76 (0%)	0/76 (0%)	4/76 (5%)	72/76 (95%)	JUN,RRAS,FGFR4,PIK3CD
CD40 Signaling	0.00213796	2	0/79 (0%)	0/79 (0%)	4/79 (5%)	75/79 (95%)	JUN,FGFR4,PIK3CD,NFKB2
IL-3 Signaling	0.00251189	2	0/83 (0%)	0/83 (0%)	4/83 (5%)	79/83 (95%)	JUN,RRAS,FGFR4,PIK3CD
Prolactin Signaling	0.00251189	2	0/83 (0%)	0/83 (0%)	4/83 (5%)	79/83 (95%)	JUN,RRAS,FGFR4,PIK3CD
Renal Cell Carcinoma Signaling	0.00251189	2	0/83 (0%)	0/83 (0%)	4/83 (5%)	79/83 (95%)	JUN,RRAS,FGFR4,PIK3CD
PEDF Signaling	0.00301995	2	0/87 (0%)	0/87 (0%)	4/87 (5%)	83/87 (95%)	RRAS,FGFR4,PIK3CD,NFKB2
PDGF Signaling	0.00338844	2	0/90 (0%)	0/90 (0%)	4/90 (4%)	86/90 (96%)	JUN,RRAS,FGFR4,PIK3CD
Acute Myeloid Leukemia Signaling	0.00380189	2	0/93 (0%)	0/93 (0%)	4/93 (4%)	89/93 (96%)	RRAS,FGFR4,PIK3CD,NFKB2
PAK Signaling	0.00512861	2	0/101 (0%)	0/101 (0%)	4/101 (4%)	97/101 (96%)	ITGA3,RRAS,FGFR4,PIK3CD
SAPK/JNK Signaling	0.00562341	2	0/104 (0%)	0/104 (0%)	4/104 (4%)	100/104 (96%)	JUN,RRAS,FGFR4,PIK3CD
IGF-1 Signaling	0.0060256	2	0/106 (0%)	0/106 (0%)	4/106 (4%)	102/106 (96%)	JUN,RRAS,FGFR4,PIK3CD
NGF Signaling	0.00933254	2	0/120 (0%)	0/120 (0%)	4/120 (3%)	116/120 (97%)	RRAS,FGFR4,PIK3CD,NFKB2
Endothelin-1 Signaling	0.01	2	0/190 (0%)	0/190 (0%)	5/190 (3%)	185/190 (97%)	JUN,RRAS,FGFR4,ECE1,PIK3CD
fMLP Signaling in Neutrophils	0.0102329	2	0/123 (0%)	0/123 (0%)	4/123 (3%)	119/123 (97%)	RRAS,FGFR4,PIK3CD,NFKB2
PI3K Signaling in B Lymphocytes	0.0123027	2	0/130 (0%)	0/130 (0%)	4/130 (3%)	126/130 (97%)	JUN,RRAS,PIK3CD,NFKB2
14-3-3-mediated Signaling	0.0125893	2	0/131 (0%)	0/131 (0%)	4/131 (3%)	127/131 (97%)	JUN,RRAS,FGFR4,PIK3CD
CD28 Signaling in T Helper Cells	0.0128825	2	0/132 (0%)	0/132 (0%)	4/132 (3%)	128/132 (97%)	JUN,FGFR4,PIK3CD,NFKB2
Relaxin Signaling	0.0213796	2	0/154 (0%)	0/154 (0%)	4/154 (3%)	150/154 (97%)	JUN,FGFR4,PIK3CD,NFKB2
CXCR4 Signaling	0.0269153	2	0/165 (0%)	0/165 (0%)	4/165 (2%)	161/165 (98%)	JUN,RRAS,FGFR4,PIK3CD
Acute Phase Response Signaling	0.0295121	2	0/170 (0%)	0/170 (0%)	4/170 (2%)	166/170 (98%)	JUN,RRAS,PIK3CD,NFKB2
IL-8 Signaling	0.0467735	2	0/197 (0%)	0/197 (0%)	4/197 (2%)	193/197 (98%)	JUN,RRAS,FGFR4,PIK3CD
PTEN Signaling	0.000169824	-2.449	0/119 (0%)	0/119 (0%)	6/119 (5%)	113/119 (95%)	ITGA3,RRAS,FGFR4,PIK3CD,NFKB2,DDR1

## Sheet: Supplementary Table 11
Supplementary Table 11. List of upstream regulators significantly dysregulated upon CI-994 treatment.
Upstream Regulator	Molecule Type	Activation z-score	p-value of overlap	Target molecules in dataset
TLR4	transmembrane receptor	2.2	0.0137	CERS2,HPSE,NFKB2,NSMAF,PLK2,SH3BP5,SLC7A11
SMARCA4	transcription regulator	2.2	0.0263	ASNS,FOLR1,FOSL2,HLA-E,ITGA3,ITGA7,JUN,NFKB2,TYMS
F2	peptidase	2.176	0.0345	ECE1,FOSL2,JUN,LBH,RGS3
IFNA2	cytokine	2.172	0.00599	C19orf66,HLA-E,IFI6,NLGN2,SDC1,TGM2
NFkB (complex)	complex	2.155	0.0109	CLIP2,HDGF,JUN,MSX2,NFKB2,ODC1,PLK2,PPARA,RRAS,TGM2
MET	kinase	1.982	0.00544	ITGA3,JUN,PLK2,SH3BP5
CTNNB1	transcription regulator	1.981	0.0289	AGRN,CFD,ERBB3,FSTL3,HDGF,JUN,LBH,MSX2,NKD1,TGM2
CXCL12	cytokine	1.951	0.0467	CD9,JUN,MSX2,RRAS
TGFB1	growth factor	1.834	0.000339	ACSM3,ADI1,AIF1L,ARID5B,ASNS,BDH1,CELSR2,CFD,DAPK1,ECE1,FOSL2,FSTL3,GSN,HDGF,HMGN2,ITGA3,ITGA7,JUN,NDRG4,NPTXR,PIK3CD,PLK2,SDC1,TGM2,TYMS
IFNG	cytokine	1.811	0.0019	AGRN,AIF1L,ASNS,CELSR2,CLIP2,CRLF1,DAPK1,ECE1,HLA-E,IFI6,JUN,NDRG4,NFKB2,ODC1,PPARA,SDC1,SLC7A11,SMAD1,SYT7
NGF	growth factor	1.761	0.0405	AGRN,FOSL2,JUN,LRP1
MYCN	transcription regulator	-1.698	0.0133	ABCB10,ITGA3,MSRB3,MSX2,ODC1,TGM2
POU5F1	transcription regulator	-1.954	0.18	DAPK1,KDM2B,PPARA,SMAD1
